# Supplementary material
Source: PubMed Central journal article supplement (PMC5749537)
Supplement: jci-128-93597-s001.pdf [file jci-128-93597-s001.pdf]

# Stromal Lkb1 deficiency leads to gastrointestinal tumorigenesis involving the IL-11–JAK/STAT3 pathway

Saara Ollila, Eva Domènech-Moreno, Kaisa Laajanen, Iris P L Wong, Sushil Tripathi, Nalle Pentinmikko, Yajing Gao, Yan Yan, Elina H Niemelä, Timothy C Wang, Benoit Viollet, Gustavo Leone, Pekka Katajisto, Kari Vaahtomeri, Tomi P Mäkelä.

## Supplemental Figures

**Supplemental Figure 1. Recombination driven by Twist2-Cre and Fsp1-Cre alleles in gastric mucosa.** (A) Twist2-Cre driven Cre activity as depicted by green fluorescence in *Twist2-Cre;R26R-mTmG* mouse antral stomach. Dashed line depicts one epithelial gland. Representative image is shown. Scale bar, 50  $\mu$ m. (B) Fsp1-Cre driven Cre activity as depicted by blue X-gal staining in *Fsp1-Cre;R26R-LacZ* mouse antral stomach. Representative image is shown. Scale bar, 50  $\mu$ m. (C) Left panel. Representative macroscopic image of X-gal stained *Fsp1-Cre;R26R-LacZ* control mouse antrum. Black arrows depict X-gal stained glands representing sparse activity of Fsp1-Cre transgene in epithelium. Scale bar, 2 mm. Right panel. Representative section of X-gal stained *Fsp1-Cre;R26R-LacZ* mouse antrum depicting recombination in an epithelial gland (black arrow). Scale bar, 50  $\mu$ m. (D) Representative macroscopic image of X-gal stained *Lkb1<sup>FspKO/FspKO</sup>;R26R-LacZ* mouse antrum with polyps. Black arrows depict X-gal stained glands representing sparse activity of Fsp1-Cre transgene in a low number of epithelial glands in gastric polyps. Scale bar, 2 mm. Right panel. X-gal stained section of two adjacent polyps in *Lkb1<sup>FspKO/FspKO</sup>;R26R-LacZ* mouse antrum. X-gal stained, Lkb1 deficient stroma is dramatically expanded in all polyps, whereas epithelial recombination is rare and only occurs in a subset of polyps (black arrow). Scale bar, 50  $\mu$ m.

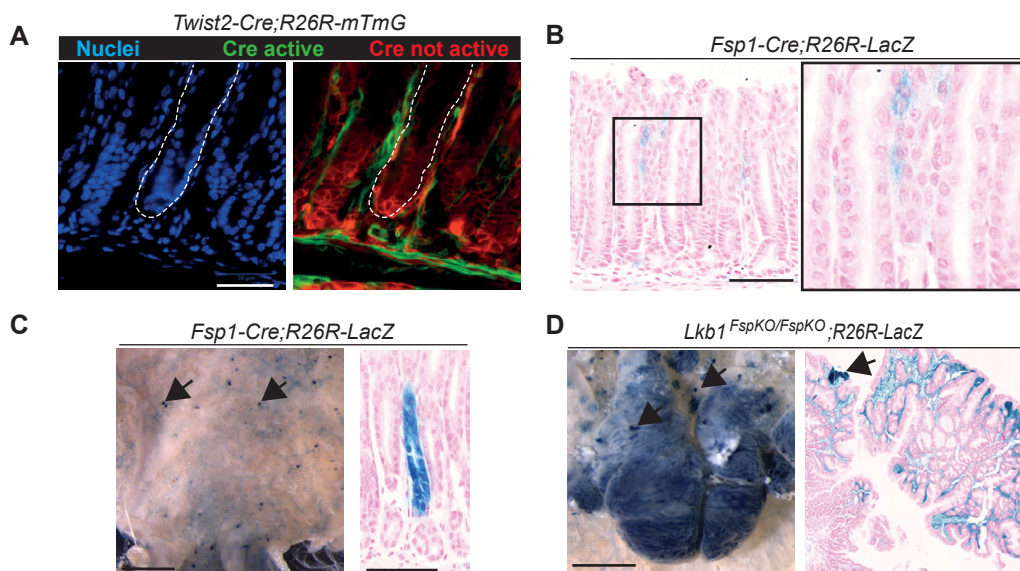

**Supplemental Figure 2. Rare targeting of immune cells by Twist2-Cre and Fsp1-Cre alleles.**  
 (A) Immune cells in the submucosa (examples noted by arrows) and mucosa (cells inside the dashed line) were visualized by Cd45 staining in *Lkb1<sup>TwKO/+</sup>;R26R-mTmG* polyp sections. Cd45+ cells from two different polyps were counted and targeting by Twist2-Cre assessed by expression of red (mTomato) or green (EGFP) fluorescence. The vast majority (754/785 counted cells; 96.1%) of the Cd45+ cells expressed Tomato and therefore were not recombined (yellow arrows). 31/785 cells (3.9%) expressed EGFP denoting recombination (example: pink arrow). (B) X-gal staining of *Lkb1<sup>FspKO/FspKO</sup>;R26R-LacZ* polyp section reveals no recombination in the immune cells infiltrating to submucosa (examples noted with black arrows) and polyp lamina propria (cells inside the dashed line). Immune cells were identified by morphology. NFR, nuclear fast red; E, epithelial gland; M, muscularis mucosa; S, submucosa. Scale bars, 50  $\mu$ m.

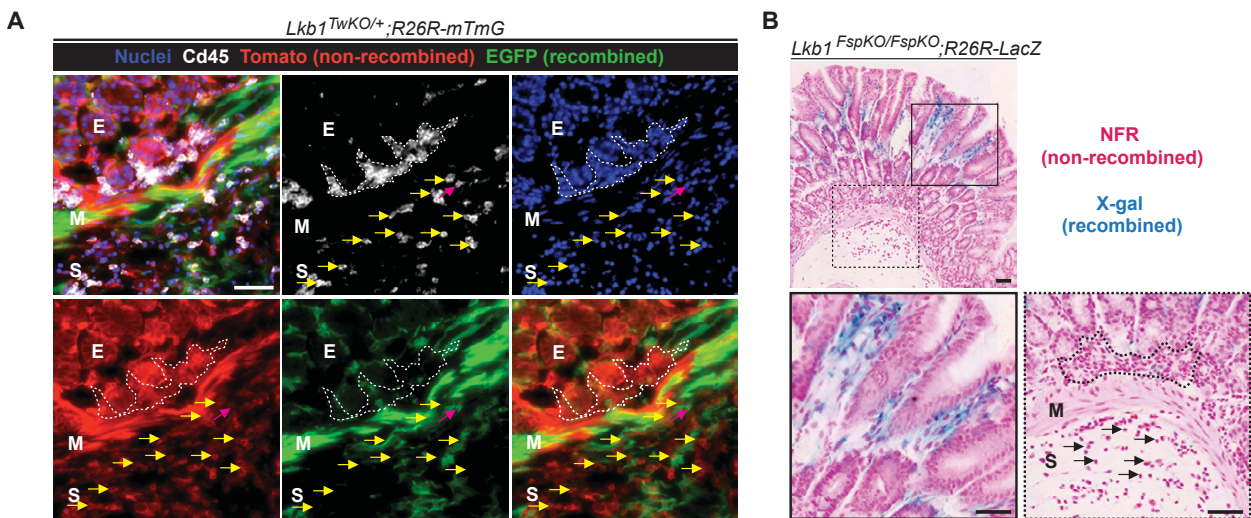

**Supplemental Figure 3. Non-clonal epithelium and typical PJS polyp histology in PJS mouse models.** (A) *Lkb1*<sup>+/-</sup> mice carrying the *Lgr5-EGFP-IRES-ERT2* allele and *R26R-tdTomato* reporter were injected with tamoxifen to induce clonal lineage tracing. The tissues were analyzed 10 months after injection and gastric stem cells (*Lgr5-EGFP*) and lineage tracing events (*tdTomato*) were analyzed in polyps and adjacent gastric mucosa. Four polyps from two mice were analyzed, representative image is shown. Scale bar, 500  $\mu$ m. (B) Representative hematoxylin-eosin (HE) staining of antral polyps of mice with indicated genotypes and ages. Zoom-ins illustrate the branching stroma typical for PJS polyps. Scale bar, 200  $\mu$ m.

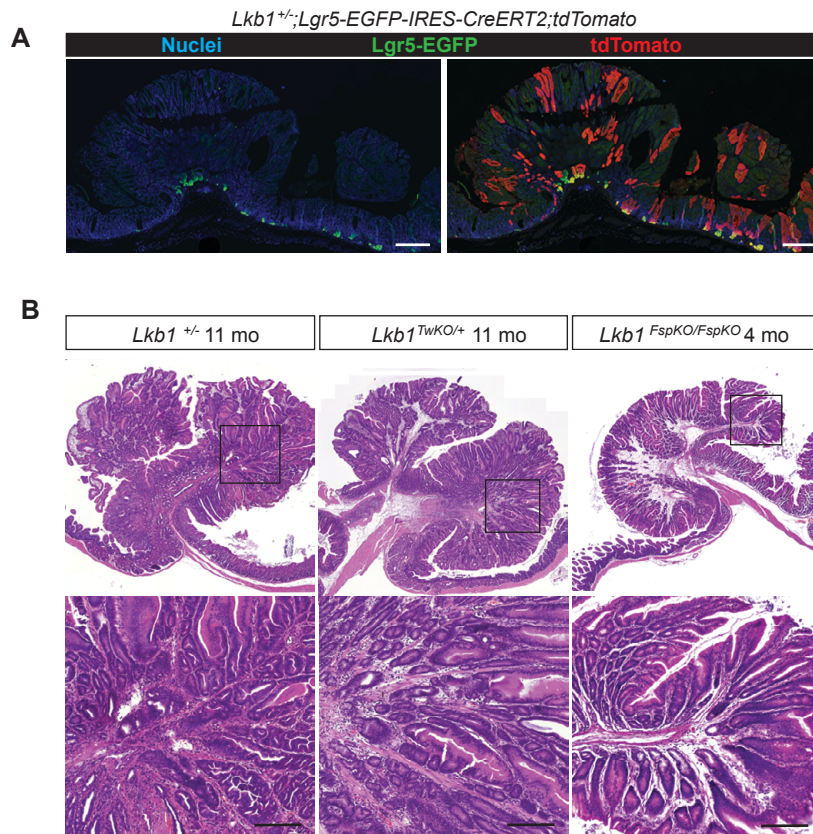

**Supplemental Figure 4. Stromal cells in polyps express myofibroblast markers.** (A) Antral polyps derived from mice of indicated genotypes were stained with stroma-specific marker vimentin, myofibroblast marker  $\alpha$ -smooth muscle actin ( $\alpha$ SMA), and fibroblast-specific protein (Fsp1). Wild-type control is shown in the lowest panel (control stomach). (B) *Lkb1*<sup>FspKO/FspKO</sup> mouse polyp double-stained for Fsp1 and  $\alpha$ SMA. Arrow denotes a rare double-positive cell representing 2.4% of all Fsp1 expressing cells (n=3 polyps, >130 cells counted from each polyp, SD +/-0.6%). Scale bar, 100  $\mu$ m.

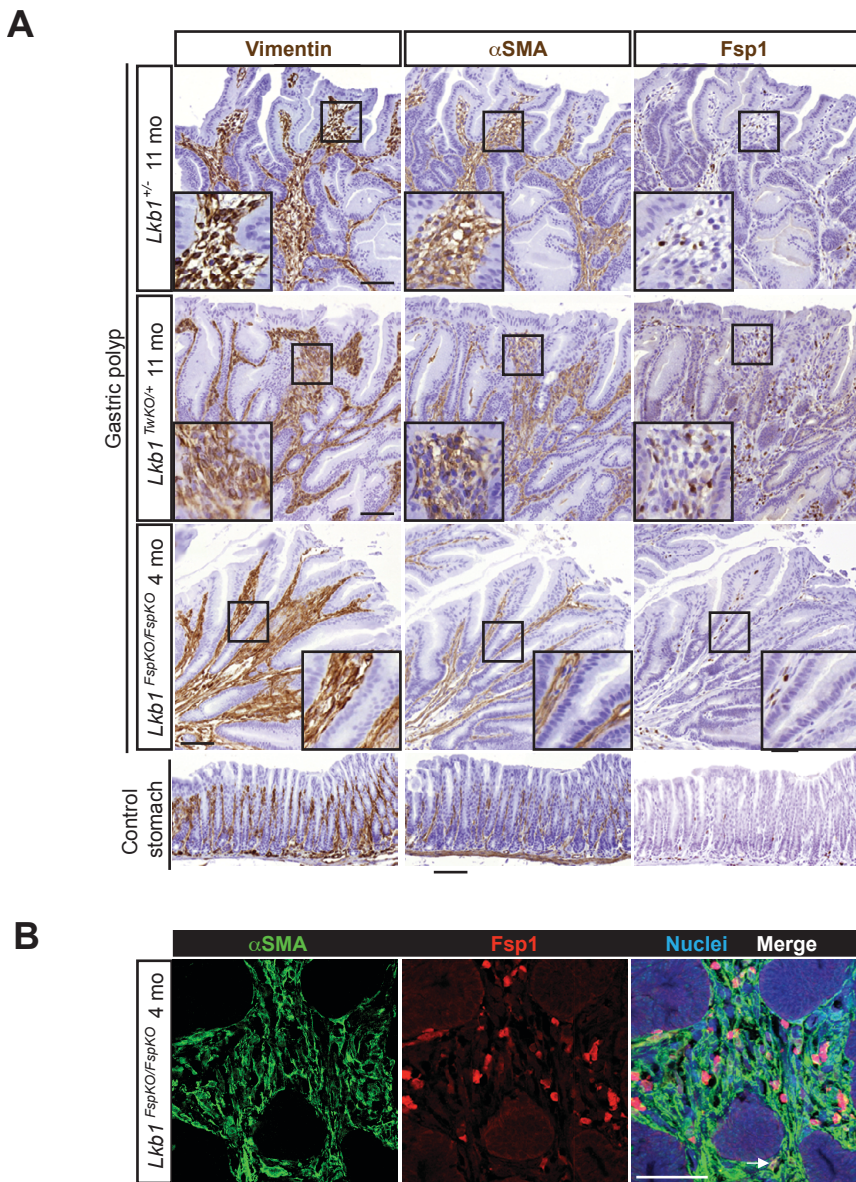

**Supplemental Figure 5. Both stromal and epithelial cells are actively proliferating in polyps.** Ki67 staining depicting proliferating cells in stroma (arrowheads) and epithelium in polyps and normal gastric mucosa. Zoom-ins allow comparison to wild-type control antrum (bottom panel) revealing increased epithelial proliferation in polyps of both *Lkb1*<sup>+/-</sup> mice and *Lkb1*<sup>FspKO/FspKO</sup> mice, where *Lkb1* loss is restricted to stromal cells. Scale bars, 100  $\mu$ m.

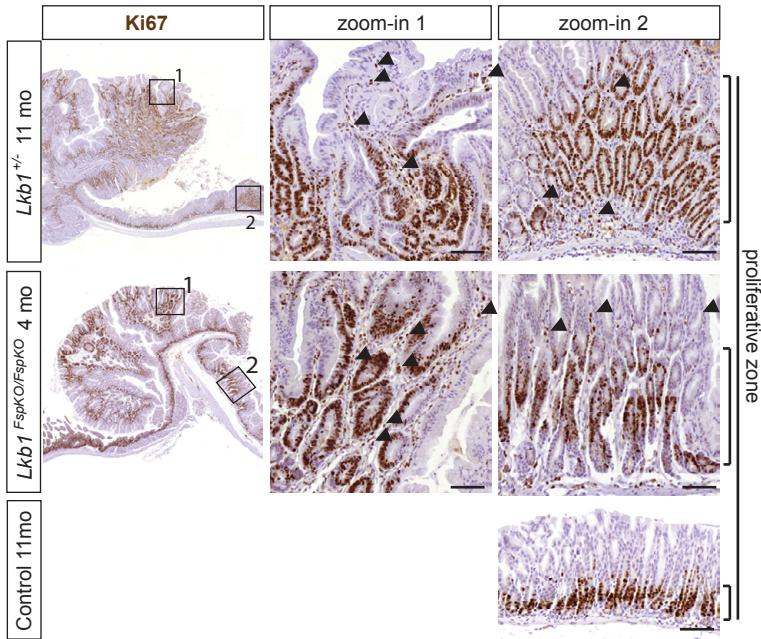

**Supplemental Figure 6. RNA-sequencing of polyps in *Lkb1*<sup>FspKO/FspKO</sup> mice reveal robust gene expression changes correlating with changes in PJS polyps.** (A) Principal component analysis (PCA) of the RNA-sequenced samples: polyps (n=6) and normal gastric mucosa (n=4) from *Lkb1*<sup>FspKO/FspKO</sup> mice, and gastric mucosa from wild-type control mice (n=5). (B) Heatmap of hierarchical clustering of the Euclidean distances to assess overall similarity between samples. (C) Gene set enrichment analysis. RNA-seq gene list was ranked by log<sub>2</sub> fold-change and compared against significantly up- and downregulated datasets from published microarray experiments conducted with PJS patient polyps (26) and *Lkb1*<sup>+/-</sup> mouse polyps (25, 21) using the GSEA preranked module. (D) qPCR validation of *Lrg1*, *Wnt5a*, *Grem2* and *Lgr5* mRNA expression, previously known to be up- (*Lrg1* and *Wnt5a*) or downregulated (*Grem2*, *Lgr5*) in PJS patient polyps (25). Validation was done from all PJS models used in this study (indicated). Asterisks depict p-value <0.05 assessed by unpaired two-tailed T-test. N=3-5 per datapoint. Data is shown relative to control (normal mucosa) samples. Data shown is average of three experiments, error bars denote SEM.  $\beta$ -actin was used as normalization control.

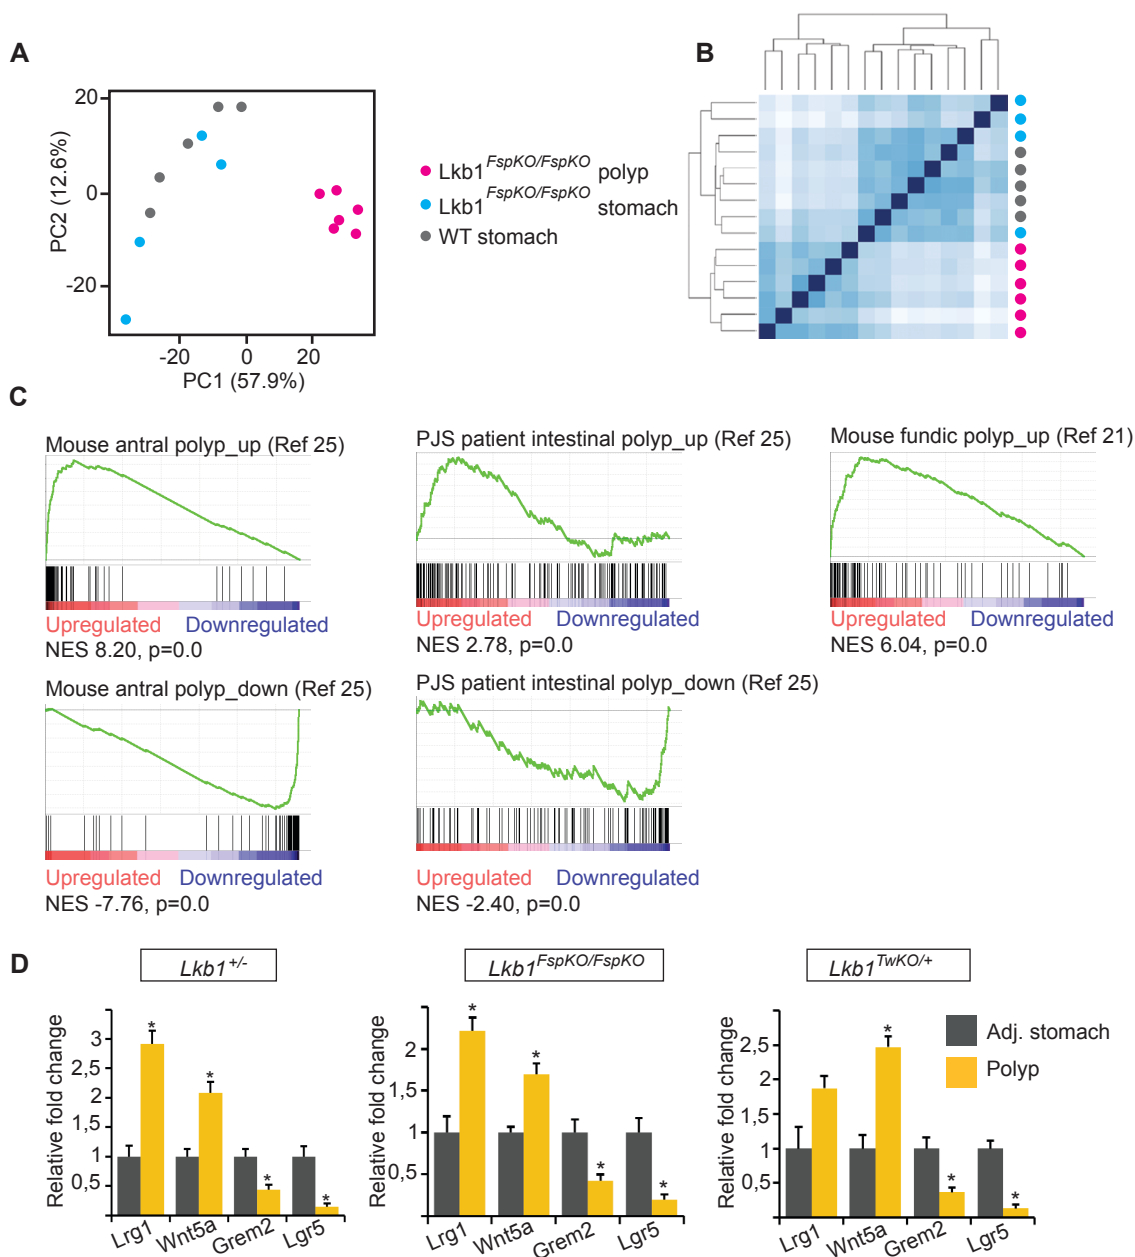

**Supplemental Figure 7. Unbiased representation of gene expression signatures in *Lkb1*<sup>FspKO/FspKO</sup> mouse polyps revealed by RNA-sequencing.** The lists of significantly upregulated (2045) and downregulated (2153) genes in RNA-seq analysis were compared to KEGG database gene sets and Gene Ontology Molecular Function gene sets using Molecular Signatures Database (MSigDB) (73) and ranked by (-log<sub>10</sub>) p-value. Top 15 significantly altered gene sets are shown.

**A**

**Upregulated KEGG pathways**

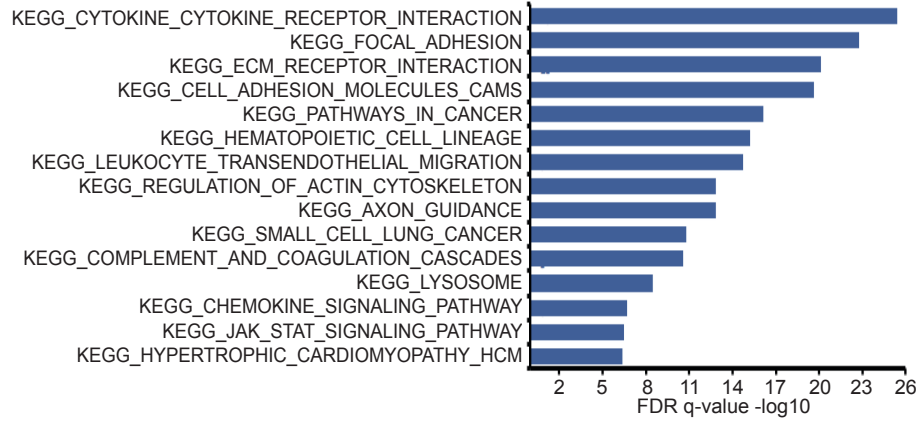

**Downregulated KEGG pathways**

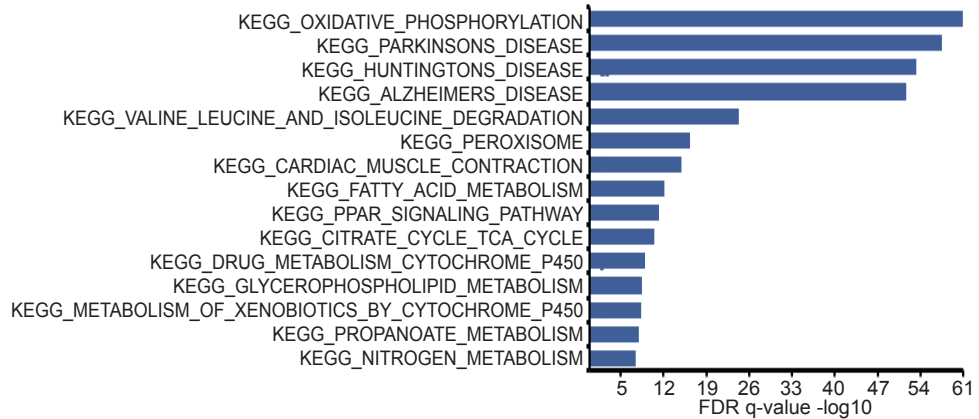

**B**

**Upregulated GO terms (molecular function)**

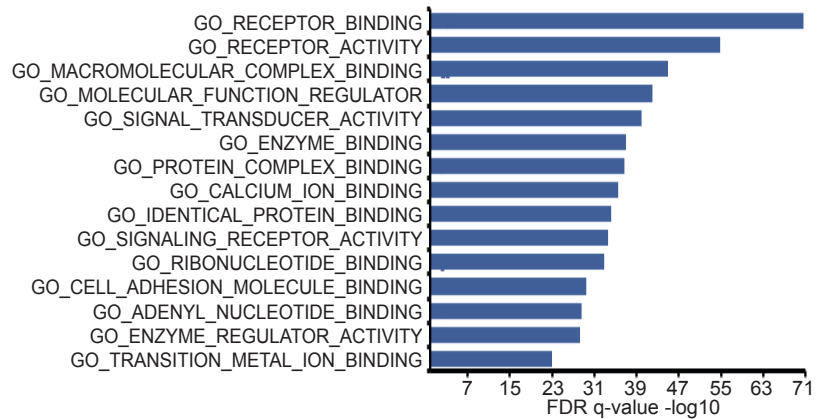

**Downregulated GO terms (molecular function)**

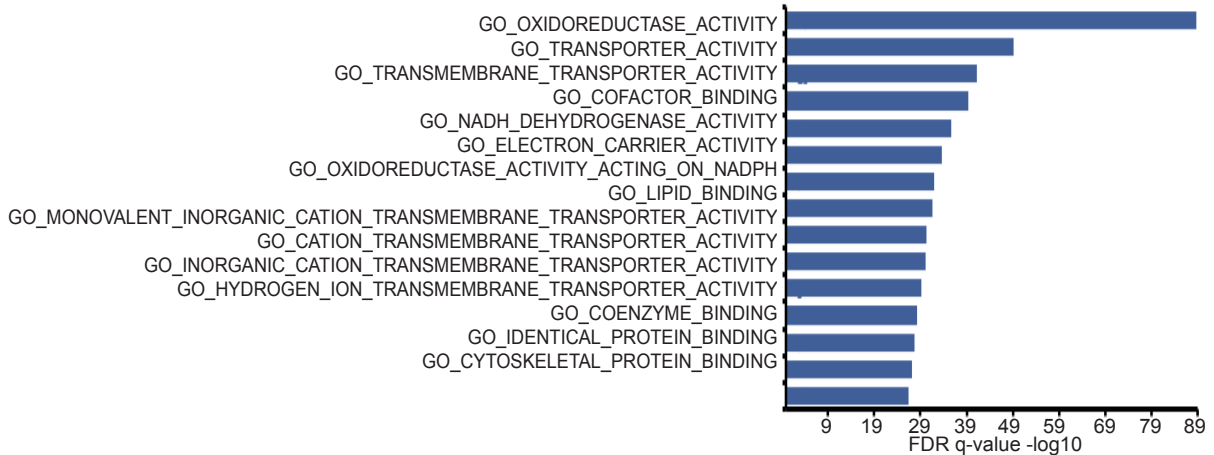



**Supplemental Figure 8. IL-11 is upregulated in *Lkb1*-deficient gastric fibroblasts.** (A) Migration of fibroblasts from gastric tissue pieces on cell culture dish on day 7 post plating. (B) FACS strategy for sorting Tomato+ and EGFP+ cell populations. The mixed population expressing both markers was not collected. (C) FACS sorted gastric fibroblasts. Scale bar, 50  $\mu$ m. (D) mRNA expression of *Lkb1* and *IL-11* in fibroblasts isolated from *Lkb1*<sup>FspKO/FspKO</sup> (*Lkb1*<sup>fl/fl</sup>) or Fsp1-Cre control (*Lkb1*<sup>+/+</sup>) mice. Values represent relative expression levels in EGFP+ cells as compared to the Tomato+ cells (expression set as 1) derived from the same mouse.  $\beta$ -actin was used as normalization control.

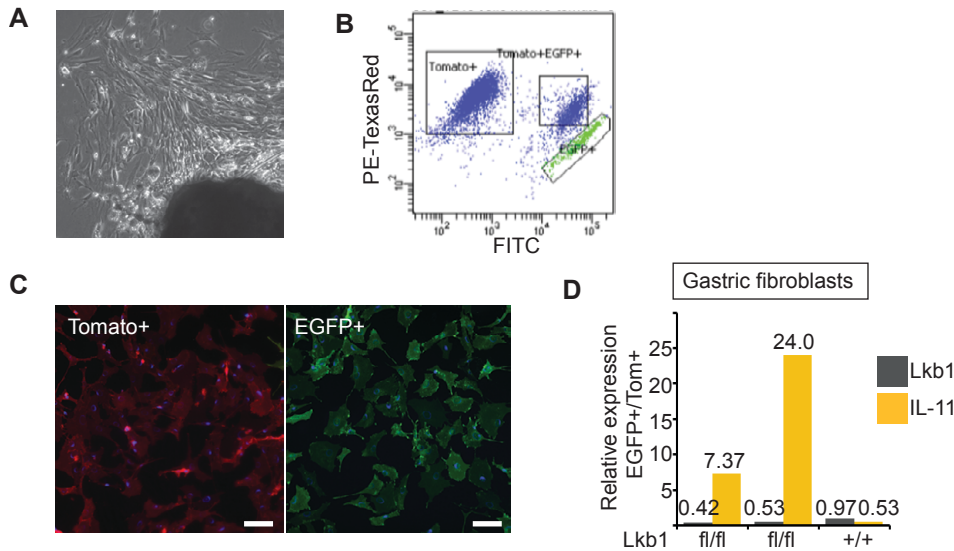

**Supplemental Figure 9. Screen of *Lkb1* phosphorylation substrates to identify pathways regulating inflammatory cytokine expression.** (A) mRNA expression of *Lkb1*, *IL-11*, *Cxcl14* and *IL-6* in *Lkb1<sup>fl/fl</sup>* MEFs after AdCre transduction (derived from Figure 6). (B) mRNA expression of *AMPK $\alpha$ 1*, *AMPK $\alpha$ 2*, *IL-11*, *Cxcl14* and *IL-6* in primary *AMPK $\alpha$ 1<sup>fl/fl</sup>;AMPK $\alpha$ 2<sup>fl/fl</sup>* mouse embryonic fibroblasts after AdCre transduction. Control cells were transduced with AdGFP. Representative of three experiments is shown. (C) mRNA expression of *IL-11*, *Cxcl14* and *IL-6* in response to indicated knockdowns by targeting shRNA. Expression levels are reported relative to non-targeting scrambled shRNA samples (shScr), average of three experiments is shown. Knockdown efficiencies were assessed by qPCR from cells transduced with targeting shRNA relative to shScr controls. Average expression levels of the targeted genes in triplicate experiments (percentage compared to shScr samples  $\pm$ SEM) were following: Nuak1: 12 $\pm$ 2%, Nuak2: 25 $\pm$ 1%, Mark1: 20 $\pm$ 3%, Mark2: 35 $\pm$ 5%, Mark3: 27 $\pm$ 5%, Mark4: 16 $\pm$ 4%, Sik1: 45 $\pm$ 4%, Sik2: 35 $\pm$ 8%, Sik3: 28 $\pm$ 4%. Two-tailed non-paired T-test was used for statistical analysis. Asterisks represent p-value <0.05. Error bars denote SEM.

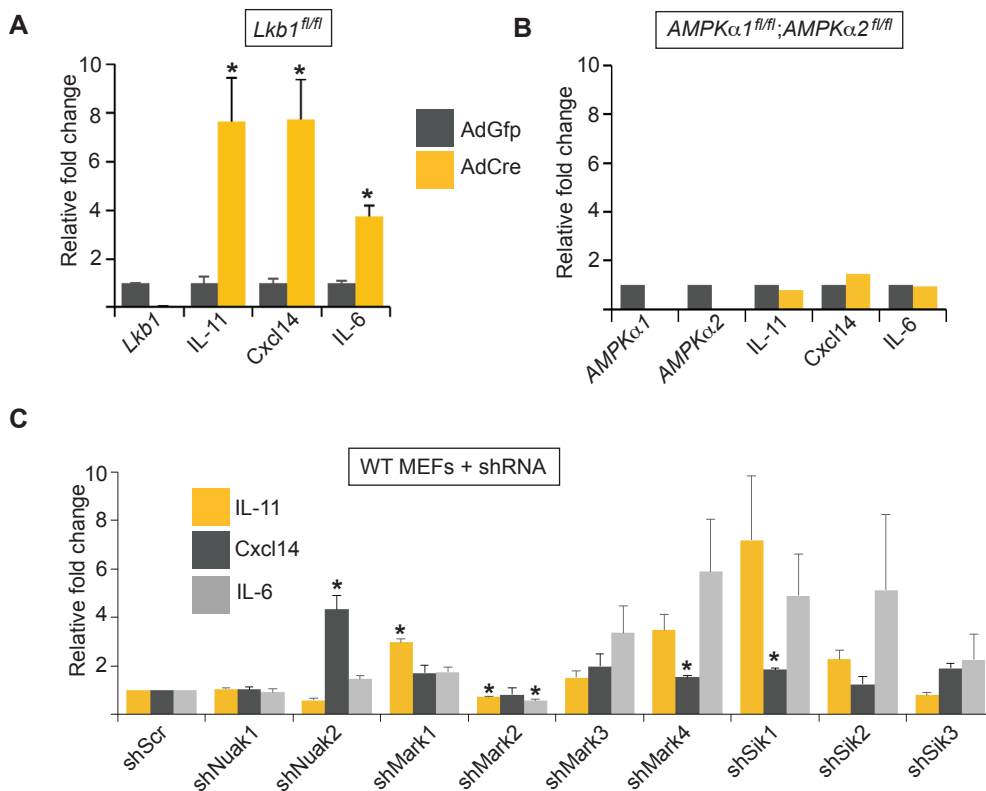

**Supplemental Figure 10. Effects of Ruxolitinib on polyp diameter, bodyweight and spleen size.**

(A) Distribution of polyp size in control and ruxolitinib-treated mice. (B, D) Bodyweights of ruxolitinib-treated and control mice after treatment. B, *Lkb1<sup>FspKO/FspKO</sup>* mice; D, Control (*Lkb1<sup>fl/fl</sup>*) mice. (C, E) Spleen weights of ruxolitinib-treated and control mice after treatment. C, *Lkb1<sup>FspKO/FspKO</sup>* mice; E, Control (*Lkb1<sup>fl/fl</sup>*) mice. P-values were assessed with two-tailed non-paired T-test. Lines depict mean and SD.

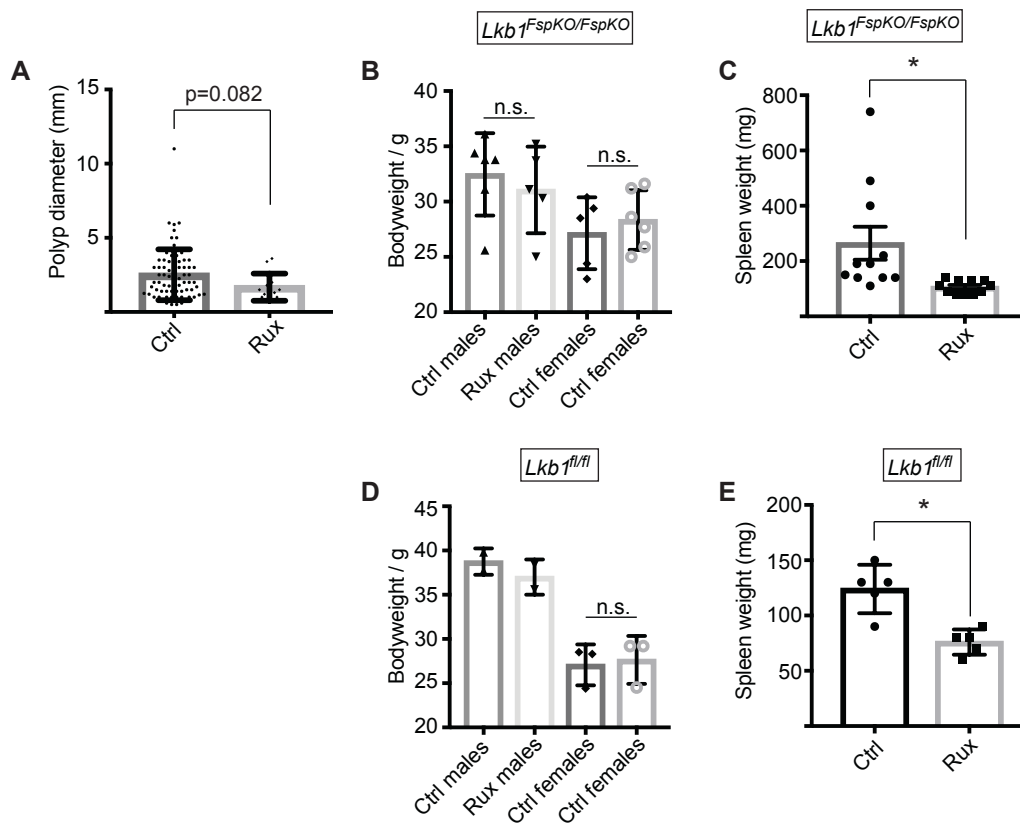

| Rank | Gene name     | ENSEMBL ID          | baseMean | log2FC | pvalue   | padj     |
|------|---------------|---------------------|----------|--------|----------|----------|
| 1    | Otop3         | ENSMUSG00000018862  | 445,98   | 5,39   | 7,22E-68 | 8,41E-64 |
| 2    | Prap1         | ENSMUSG00000025467  | 263,28   | 4,79   | 6,18E-26 | 7,57E-23 |
| 3    | Themis3       | ENSMUSG00000024105  | 35,17    | 4,77   | 2,30E-30 | 4,45E-27 |
| 4    | Cxcl5         | ENSMUSG00000029371  | 41,1     | 4,59   | 2,61E-25 | 2,90E-22 |
| 5    | Gm16054       | ENSMUSG00000087431  | 15,24    | 4,51   | 5,22E-24 | 4,67E-21 |
| 6    | Vwde          | ENSMUSG00000079679  | 123,43   | 3,99   | 2,23E-22 | 1,40E-19 |
| 7    | Gm3054        | ENSMUSG00000079174  | 15,16    | 3,97   | 1,03E-18 | 4,12E-16 |
| 8    | Gm379         | ENSMUSG00000093916  | 30,53    | 3,93   | 2,76E-20 | 1,37E-17 |
| 9    | Muc13         | ENSMUSG00000022824  | 361,09   | 3,86   | 4,35E-17 | 1,39E-14 |
| 10   | Muc3          | ENSMUSG00000037390  | 118,29   | 3,83   | 7,75E-24 | 6,68E-21 |
| 11   | Shf           | ENSMUSG00000033256  | 137,7    | 3,79   | 1,69E-43 | 5,61E-40 |
| 12   | Adcy8         | ENSMUSG00000022376  | 21,51    | 3,77   | 1,87E-16 | 5,17E-14 |
| 13   | Heph          | ENSMUSG00000031209  | 188,08   | 3,46   | 1,96E-22 | 1,26E-19 |
| 14   | Naip1         | ENSMUSG00000021640  | 246,3    | 3,45   | 1,68E-14 | 3,25E-12 |
| 15   | Cdh17         | ENSMUSG00000028217  | 172,98   | 3,43   | 6,84E-15 | 1,43E-12 |
| 16   | Cfhr2         | ENSMUSG00000033898  | 9,56     | 3,4    | 3,56E-12 | 4,00E-10 |
| 17   | Adgrg4        | ENSMUSG00000053852  | 7,78     | 3,36   | 4,79E-12 | 5,18E-10 |
| 18   | Mcpt2         | ENSMUSG00000022226  | 457,87   | 3,36   | 1,64E-21 | 9,77E-19 |
| 19   | Vnn1          | ENSMUSG00000037440  | 186,98   | 3,34   | 1,91E-48 | 1,11E-44 |
| 20   | Khdc1a        | ENSMUSG00000067750  | 14,02    | 3,33   | 7,09E-12 | 7,46E-10 |
| 21   | Mmp10         | ENSMUSG00000047562  | 205,55   | 3,32   | 9,45E-12 | 9,64E-10 |
| 22   | Apln          | ENSMUSG00000037010  | 81,21    | 3,27   | 3,95E-19 | 1,73E-16 |
| 23   | Rhox5         | ENSMUSG00000095180  | 14,67    | 3,26   | 1,88E-11 | 1,84E-09 |
| 24   | Acnat2        | ENSMUSG00000060317  | 27,43    | 3,2    | 1,19E-14 | 2,39E-12 |
| 25   | Gabrp         | ENSMUSG00000020159  | 56,3     | 3,19   | 2,80E-11 | 2,60E-09 |
| 26   | Tmem236       | ENSMUSG00000061531  | 21,81    | 3,06   | 3,69E-12 | 4,10E-10 |
| 27   | Cyp4f40       | ENSMUSG00000090700  | 42,52    | 3,05   | 2,75E-12 | 3,29E-10 |
| 28   | Cldn7         | ENSMUSG00000018569  | 271,48   | 3,05   | 6,21E-18 | 2,22E-15 |
| 29   | Pkp1          | ENSMUSG00000026413  | 31,95    | 3,03   | 2,41E-19 | 1,08E-16 |
| 30   | Angptl4       | ENSMUSG00000002289  | 29,12    | 3,03   | 2,20E-14 | 4,06E-12 |
| 31   | Gm12603       | ENSMUSG00000085183  | 5,64     | 3      | 5,05E-10 | 3,49E-08 |
| 32   | Prr27         | ENSMUSG00000002240  | 8,71     | 2,99   | 1,60E-09 | 9,80E-08 |
| 33   | Clu           | ENSMUSG00000022037  | 26745,36 | 2,95   | 1,78E-29 | 2,96E-26 |
| 34   | Nppc          | ENSMUSG00000026241  | 3,85     | 2,94   | 1,59E-09 | 9,76E-08 |
| 35   | Mug1          | ENSMUSG00000059908  | 677,12   | 2,94   | 3,43E-15 | 7,52E-13 |
| 36   | 1700010I02Rik | ENSMUSG000000100010 | 5,32     | 2,93   | 3,02E-09 | 1,74E-07 |
| 37   | Grhl3         | ENSMUSG00000037188  | 16,02    | 2,92   | 1,95E-13 | 2,91E-11 |
| 38   | Mmp7          | ENSMUSG00000018623  | 9,53     | 2,87   | 9,81E-10 | 6,34E-08 |
| 39   | A2m           | ENSMUSG00000030111  | 162,02   | 2,85   | 8,34E-09 | 4,26E-07 |
| 40   | Ighv1-80      | ENSMUSG00000094075  | 12,66    | 2,83   | 1,59E-09 | 9,75E-08 |
| 41   | Tnip3         | ENSMUSG00000044162  | 39,47    | 2,81   | 1,79E-19 | 8,51E-17 |
| 42   | Sorcs1        | ENSMUSG00000043531  | 46,65    | 2,78   | 3,69E-17 | 1,21E-14 |
| 43   | Lama1         | ENSMUSG00000032796  | 178,78   | 2,77   | 1,91E-19 | 8,90E-17 |
| 44   | S100b         | ENSMUSG00000033208  | 61,28    | 2,74   | 6,00E-12 | 6,41E-10 |

|    |               |                     |         |      |          |          |
|----|---------------|---------------------|---------|------|----------|----------|
| 45 | Baiap2l2      | ENSMUSG00000018126  | 11,37   | 2,74 | 9,28E-11 | 7,79E-09 |
| 46 | Lrrc75b       | ENSMUSG00000046807  | 1819,96 | 2,72 | 6,70E-21 | 3,90E-18 |
| 47 | Lzts1         | ENSMUSG00000036306  | 24,7    | 2,7  | 2,71E-11 | 2,52E-09 |
| 48 | Aqp1          | ENSMUSG00000004655  | 705,75  | 2,7  | 1,53E-22 | 1,01E-19 |
| 49 | Serpine2      | ENSMUSG00000026249  | 467,69  | 2,69 | 1,36E-12 | 1,73E-10 |
| 50 | Hunk          | ENSMUSG00000053414  | 9,45    | 2,68 | 1,24E-08 | 6,05E-07 |
| 51 | Rgs17         | ENSMUSG00000019775  | 310,97  | 2,68 | 4,30E-15 | 9,25E-13 |
| 52 | Dyrk4         | ENSMUSG00000030345  | 37,59   | 2,67 | 8,62E-08 | 3,23E-06 |
| 53 | Ggt1          | ENSMUSG00000006345  | 1495,94 | 2,65 | 5,01E-17 | 1,58E-14 |
| 54 | Ighv1-78      | ENSMUSG00000096326  | 10,38   | 2,65 | 9,10E-08 | 3,36E-06 |
| 55 | Cplx1         | ENSMUSG00000033615  | 7,31    | 2,65 | 6,74E-08 | 2,60E-06 |
| 56 | Tm4sf20       | ENSMUSG00000026149  | 39,37   | 2,64 | 4,34E-08 | 1,77E-06 |
| 57 | Adgrf1        | ENSMUSG00000041293  | 4,77    | 2,63 | 7,95E-08 | 3,00E-06 |
| 58 | Cyp21a1       | ENSMUSG00000024365  | 4,7     | 2,63 | 1,27E-07 | 4,52E-06 |
| 59 | Slc6a14       | ENSMUSG00000031089  | 123,98  | 2,61 | 9,41E-12 | 9,64E-10 |
| 60 | Muc3a         | ENSMUSG00000094840  | 34,89   | 2,6  | 9,99E-11 | 8,31E-09 |
| 61 | Ceacam12      | ENSMUSG00000030366  | 57,6    | 2,6  | 2,17E-07 | 7,27E-06 |
| 62 | Msln          | ENSMUSG00000063011  | 8,19    | 2,59 | 1,33E-07 | 4,72E-06 |
| 63 | Gm36988       | ENSMUSG000000102494 | 6,36    | 2,57 | 1,92E-07 | 6,54E-06 |
| 64 | Cyp4f14       | ENSMUSG00000024292  | 5,84    | 2,55 | 1,80E-07 | 6,15E-06 |
| 65 | Eef1a2        | ENSMUSG00000016349  | 24,47   | 2,54 | 1,43E-10 | 1,13E-08 |
| 66 | Slc1a1        | ENSMUSG00000024935  | 8,78    | 2,53 | 6,13E-09 | 3,21E-07 |
| 67 | Aldh1a3       | ENSMUSG00000015134  | 297,21  | 2,52 | 1,19E-07 | 4,28E-06 |
| 68 | Gjb2          | ENSMUSG00000046352  | 49,16   | 2,51 | 6,18E-13 | 8,45E-11 |
| 69 | Cdx2          | ENSMUSG00000029646  | 16      | 2,5  | 5,05E-08 | 2,02E-06 |
| 70 | Malrd1        | ENSMUSG00000075520  | 7,41    | 2,5  | 1,64E-07 | 5,69E-06 |
| 71 | 1700027A15Rik | ENSMUSG000000101968 | 14,27   | 2,5  | 2,47E-07 | 8,19E-06 |
| 72 | Il1a          | ENSMUSG00000027399  | 12,99   | 2,5  | 4,78E-08 | 1,92E-06 |
| 73 | Vtcn1         | ENSMUSG00000051076  | 127,95  | 2,49 | 1,85E-12 | 2,29E-10 |
| 74 | Il11          | ENSMUSG00000004371  | 24,71   | 2,48 | 1,05E-07 | 3,81E-06 |
| 75 | Trp63         | ENSMUSG00000022510  | 4,02    | 2,46 | 7,52E-07 | 2,18E-05 |
| 76 | Reg1          | ENSMUSG00000059654  | 925,25  | 2,45 | 9,67E-07 | 2,69E-05 |
| 77 | Wfdc18        | ENSMUSG00000000983  | 331,47  | 2,45 | 9,92E-07 | 2,74E-05 |
| 78 | D130058E05Rik | ENSMUSG00000092627  | 3,02    | 2,44 | 6,43E-07 | 1,90E-05 |
| 79 | Celf4         | ENSMUSG00000024268  | 26,72   | 2,43 | 2,62E-13 | 3,78E-11 |
| 80 | BC030500      | ENSMUSG00000049946  | 4,03    | 2,43 | 8,55E-07 | 2,44E-05 |
| 81 | Gm16120       | ENSMUSG00000087248  | 9,09    | 2,4  | 2,54E-08 | 1,12E-06 |
| 82 | Vdr           | ENSMUSG00000022479  | 81,26   | 2,39 | 1,06E-17 | 3,75E-15 |
| 83 | Inhba         | ENSMUSG00000041324  | 44,7    | 2,39 | 1,57E-06 | 4,10E-05 |
| 84 | Gm11494       | ENSMUSG00000085074  | 15,86   | 2,39 | 2,12E-10 | 1,63E-08 |
| 85 | Pcdhb5        | ENSMUSG00000063687  | 31,73   | 2,38 | 1,05E-08 | 5,17E-07 |
| 86 | Serpine1      | ENSMUSG00000037411  | 131,02  | 2,38 | 5,81E-07 | 1,75E-05 |
| 87 | Scn8a         | ENSMUSG00000023033  | 26,17   | 2,38 | 1,11E-09 | 7,08E-08 |
| 88 | Pi15          | ENSMUSG00000067780  | 79,38   | 2,37 | 3,01E-16 | 7,95E-14 |
| 89 | Clca3b        | ENSMUSG00000037033  | 27,63   | 2,37 | 2,20E-06 | 5,47E-05 |

|     |               |                    |         |      |          |             |
|-----|---------------|--------------------|---------|------|----------|-------------|
| 90  | 9130208D14Rik | ENSMUSG00000086513 | 16,88   | 2,35 | 1,31E-06 | 3,48E-05    |
| 91  | Anxa8         | ENSMUSG00000021950 | 148,54  | 2,34 | 2,93E-06 | 6,99E-05    |
| 92  | Dkk1          | ENSMUSG00000030792 | 7,7     | 2,34 | 6,63E-07 | 1,95E-05    |
| 93  | Hs6st2        | ENSMUSG00000062184 | 12      | 2,34 | 9,13E-08 | 3,37E-06    |
| 94  | Gm15592       | ENSMUSG00000087389 | 24,09   | 2,33 | 9,60E-12 | 9,75E-10    |
| 95  | Gm830         | ENSMUSG00000084939 | 376,97  | 2,33 | 8,25E-08 | 3,10E-06    |
| 96  | C4bp          | ENSMUSG00000026405 | 95,52   | 2,32 | 7,16E-10 | 4,77E-08    |
| 97  | Sftpd         | ENSMUSG00000021795 | 69,02   | 2,32 | 4,99E-07 | 1,52E-05    |
| 98  | Dmkn          | ENSMUSG00000060962 | 376,74  | 2,31 | 1,26E-12 | 1,61E-10    |
| 99  | Trbc2         | ENSMUSG00000076498 | 10,85   | 2,31 | 2,43E-07 | 8,07E-06    |
| 100 | Scgb2b20      | ENSMUSG00000094305 | 78,29   | 2,31 | 4,09E-06 | 9,25E-05    |
| 101 | Igkv4-59      | ENSMUSG00000094006 | 9,11    | 2,31 | 1,26E-06 | 3,38E-05    |
| 102 | Ighv1-18      | ENSMUSG00000076695 | 5,96    | 2,31 | 2,47E-06 | 6,05E-05    |
| 103 | Slc28a3       | ENSMUSG00000021553 | 233,64  | 2,31 | 2,49E-11 | 2,34E-09    |
| 104 | Slc40a1       | ENSMUSG00000025993 | 491,54  | 2,31 | 2,50E-40 | 6,47E-37    |
| 105 | Cidea         | ENSMUSG00000024526 | 30,43   | 2,3  | 6,28E-07 | 1,86E-05    |
| 106 | Pcdhb9        | ENSMUSG00000051242 | 36,82   | 2,3  | 5,61E-09 | 2,99E-07    |
| 107 | Ptptr         | ENSMUSG00000053141 | 521,07  | 2,29 | 1,59E-24 | 1,54E-21    |
| 108 | Stxbp5l       | ENSMUSG00000022829 | 39,32   | 2,29 | 3,75E-10 | 2,65E-08    |
| 109 | Steap4        | ENSMUSG00000012428 | 226,16  | 2,29 | 1,23E-10 | 9,85E-09    |
| 110 | Ceacam1       | ENSMUSG00000074272 | 812,71  | 2,29 | 5,71E-12 | 6,15E-10    |
| 111 | AI427809      | ENSMUSG00000086712 | 21,1    | 2,28 | 7,39E-11 | 6,35E-09    |
| 112 | Fmo9          | ENSMUSG00000026560 | 6,06    | 2,28 | 4,41E-06 | 9,89E-05    |
| 113 | Naip3         | ENSMUSG00000082956 | 35,06   | 2,26 | 5,15E-11 | 4,57E-09    |
| 114 | B4galt4       | ENSMUSG00000022793 | 54,25   | 2,25 | 2,58E-12 | 3,09E-10    |
| 115 | Gm10371       | ENSMUSG00000072589 | 3,38    | 2,25 | 5,34E-06 | 0,000116651 |
| 116 | Cldn3         | ENSMUSG00000070473 | 18,79   | 2,25 | 2,59E-08 | 1,13E-06    |
| 117 | Igkv4-53      | ENSMUSG00000095753 | 6,77    | 2,24 | 5,06E-06 | 0,000111445 |
| 118 | Otop2         | ENSMUSG00000050201 | 62,36   | 2,23 | 6,79E-09 | 3,53E-07    |
| 119 | Stc1          | ENSMUSG00000014813 | 69,52   | 2,23 | 2,03E-09 | 1,20E-07    |
| 120 | Gpr55         | ENSMUSG00000049608 | 144,84  | 2,22 | 7,09E-06 | 0,000149649 |
| 121 | Gm5150        | ENSMUSG00000078780 | 33,09   | 2,21 | 6,71E-08 | 2,59E-06    |
| 122 | Ush1g         | ENSMUSG00000045288 | 18,34   | 2,21 | 1,02E-05 | 0,000204869 |
| 123 | Onecut2       | ENSMUSG00000045991 | 1577,34 | 2,21 | 8,16E-06 | 0,000169529 |
| 124 | Hp            | ENSMUSG00000031722 | 12,22   | 2,19 | 2,51E-07 | 8,28E-06    |
| 125 | Tmem212       | ENSMUSG00000043164 | 5,53    | 2,18 | 4,15E-06 | 9,39E-05    |
| 126 | Ilf9          | ENSMUSG00000044103 | 16,68   | 2,18 | 5,29E-06 | 0,000115932 |
| 127 | Pcdhb12       | ENSMUSG00000043458 | 6,48    | 2,18 | 1,30E-06 | 3,47E-05    |
| 128 | Pcdhb10       | ENSMUSG00000045657 | 7,81    | 2,18 | 1,32E-07 | 4,68E-06    |
| 129 | Igkv6-23      | ENSMUSG00000095630 | 9,29    | 2,17 | 1,91E-06 | 4,87E-05    |
| 130 | Adgrg7        | ENSMUSG00000022755 | 307,68  | 2,17 | 1,49E-05 | 0,000281319 |
| 131 | Lcn2          | ENSMUSG00000026822 | 9,41    | 2,17 | 9,22E-06 | 0,000187914 |
| 132 | Gabrd         | ENSMUSG00000029054 | 17,89   | 2,17 | 1,06E-06 | 2,91E-05    |
| 133 | Igkv15-103    | ENSMUSG00000076523 | 18,96   | 2,16 | 9,39E-07 | 2,62E-05    |
| 134 | Clrn3         | ENSMUSG00000050866 | 73,44   | 2,16 | 9,96E-09 | 4,95E-07    |

|     |               |                     |          |      |          |             |
|-----|---------------|---------------------|----------|------|----------|-------------|
| 135 | Slco6d1       | ENSMUSG00000026336  | 7,3      | 2,15 | 8,60E-07 | 2,44E-05    |
| 136 | Dmbt1         | ENSMUSG00000047517  | 30325,64 | 2,15 | 1,55E-12 | 1,94E-10    |
| 137 | Il1b          | ENSMUSG00000027398  | 33,12    | 2,15 | 2,97E-06 | 7,07E-05    |
| 138 | RP24-343A12.4 | ENSMUSG000000107387 | 17,82    | 2,14 | 2,82E-07 | 9,14E-06    |
| 139 | Pla1a         | ENSMUSG00000002847  | 13,89    | 2,14 | 3,62E-07 | 1,15E-05    |
| 140 | Hpcal4        | ENSMUSG00000046093  | 2,84     | 2,14 | 1,62E-05 | 0,000300672 |
| 141 | D430019H16Rik | ENSMUSG000000094910 | 9,4      | 2,13 | 6,11E-07 | 1,82E-05    |
| 142 | C130074G19Rik | ENSMUSG00000039349  | 290      | 2,13 | 1,71E-16 | 4,79E-14    |
| 143 | Ighv3-6       | ENSMUSG00000076672  | 21,1     | 2,12 | 3,22E-06 | 7,61E-05    |
| 144 | Ildr1         | ENSMUSG00000022900  | 62,02    | 2,12 | 4,58E-13 | 6,45E-11    |
| 145 | Art1          | ENSMUSG00000030996  | 38,77    | 2,12 | 2,12E-11 | 2,04E-09    |
| 146 | Ngfr          | ENSMUSG00000000120  | 4,74     | 2,11 | 4,51E-06 | 0,000100754 |
| 147 | Spsb1         | ENSMUSG00000039911  | 53,03    | 2,1  | 4,44E-14 | 7,61E-12    |
| 148 | Wnt5a         | ENSMUSG00000021994  | 273,92   | 2,1  | 3,41E-26 | 4,41E-23    |
| 149 | Tnfsf18       | ENSMUSG00000066755  | 9,47     | 2,1  | 2,53E-06 | 6,17E-05    |
| 150 | Gdf5          | ENSMUSG00000038259  | 9,19     | 2,09 | 6,67E-07 | 1,96E-05    |
| 151 | St8sia3       | ENSMUSG00000056812  | 16,24    | 2,09 | 4,69E-06 | 0,000104192 |
| 152 | Cftr          | ENSMUSG00000041301  | 1216,68  | 2,08 | 1,04E-05 | 0,000206746 |
| 153 | Ighv8-8       | ENSMUSG000000104452 | 10,83    | 2,08 | 1,44E-05 | 0,000273844 |
| 154 | S100a9        | ENSMUSG00000056071  | 47,5     | 2,07 | 3,76E-05 | 0,000598011 |
| 155 | Kcng3         | ENSMUSG00000045053  | 31,4     | 2,07 | 6,09E-07 | 1,82E-05    |
| 156 | Upk1b         | ENSMUSG00000049436  | 4,68     | 2,06 | 2,86E-05 | 0,000478232 |
| 157 | Trim40        | ENSMUSG00000073399  | 17,6     | 2,06 | 3,95E-06 | 8,99E-05    |
| 158 | Tubb2b        | ENSMUSG00000045136  | 40,31    | 2,05 | 1,24E-08 | 6,06E-07    |
| 159 | Cdhr2         | ENSMUSG00000034918  | 156,72   | 2,05 | 6,47E-12 | 6,85E-10    |
| 160 | Cpne5         | ENSMUSG00000024008  | 9,44     | 2,05 | 1,90E-05 | 0,000342724 |
| 161 | Dnah5         | ENSMUSG00000022262  | 3,28     | 2,05 | 3,21E-05 | 0,000523588 |
| 162 | Rnf150        | ENSMUSG00000047747  | 85,61    | 2,05 | 9,14E-16 | 2,34E-13    |
| 163 | Krt14         | ENSMUSG00000045545  | 5,58     | 2,04 | 4,22E-05 | 0,000660808 |
| 164 | Cyp27a1       | ENSMUSG00000026170  | 70,58    | 2,04 | 4,14E-18 | 1,55E-15    |
| 165 | Nid2          | ENSMUSG00000021806  | 101,34   | 2,04 | 1,52E-11 | 1,53E-09    |
| 166 | Gm36945       | ENSMUSG000000102163 | 6,03     | 2,04 | 7,17E-06 | 0,000151146 |
| 167 | Ighv1-7       | ENSMUSG000000095200 | 8,32     | 2,04 | 3,43E-05 | 0,000552861 |
| 168 | A730049H05Rik | ENSMUSG00000048636  | 28,39    | 2,04 | 1,02E-08 | 5,05E-07    |
| 169 | Il1rl1        | ENSMUSG00000026069  | 562,01   | 2,03 | 3,25E-06 | 7,67E-05    |
| 170 | Ret           | ENSMUSG00000030110  | 140,25   | 2,03 | 7,55E-13 | 1,02E-10    |
| 171 | C6            | ENSMUSG00000022181  | 8,49     | 2,03 | 8,52E-06 | 0,000175512 |
| 172 | Ppp1r14d      | ENSMUSG00000027317  | 34,17    | 2,03 | 2,42E-09 | 1,41E-07    |
| 173 | Ighv1-22      | ENSMUSG000000094561 | 14,68    | 2,02 | 1,33E-05 | 0,000256053 |
| 174 | Klra4         | ENSMUSG00000079852  | 18,3     | 2,02 | 2,15E-05 | 0,00038139  |
| 175 | 1700028E10Rik | ENSMUSG000000097321 | 603,04   | 2,02 | 1,78E-10 | 1,38E-08    |
| 176 | Aldob         | ENSMUSG00000028307  | 54,72    | 2,02 | 3,47E-06 | 8,05E-05    |
| 177 | Onecut3       | ENSMUSG00000045518  | 77,39    | 2,01 | 1,48E-07 | 5,15E-06    |
| 178 | Rnf183        | ENSMUSG00000063851  | 17,06    | 2,01 | 5,03E-08 | 2,02E-06    |
| 179 | Tcrg-C1       | ENSMUSG00000076749  | 5,76     | 2,01 | 5,03E-05 | 0,000769033 |

|     |               |                     |         |      |             |             |
|-----|---------------|---------------------|---------|------|-------------|-------------|
| 180 | Gm37403       | ENSMUSG000000103320 | 4,46    | 2    | 2,10E-05    | 0,000374347 |
| 181 | Art5          | ENSMUSG00000070424  | 56,47   | 2    | 1,27E-10    | 1,01E-08    |
| 182 | Cers3         | ENSMUSG00000030510  | 162,34  | 1,99 | 1,55E-13    | 2,34E-11    |
| 183 | Cdh5          | ENSMUSG00000031871  | 228,21  | 1,99 | 2,73E-13    | 3,90E-11    |
| 184 | Fam124a       | ENSMUSG00000035184  | 50,56   | 1,99 | 3,42E-09    | 1,93E-07    |
| 185 | Krt4          | ENSMUSG00000059668  | 10,69   | 1,98 | 1,30E-05    | 0,000251531 |
| 186 | Igfbp5        | ENSMUSG00000026185  | 3716,19 | 1,98 | 2,46E-08    | 1,09E-06    |
| 187 | Arg1          | ENSMUSG00000019987  | 36,52   | 1,98 | 1,04E-06    | 2,87E-05    |
| 188 | Tff3          | ENSMUSG00000024029  | 585,16  | 1,98 | 7,63E-05    | 0,00109369  |
| 189 | Kl            | ENSMUSG00000058488  | 651,42  | 1,98 | 1,43E-08    | 6,90E-07    |
| 190 | Nr5a2         | ENSMUSG00000026398  | 9,44    | 1,98 | 2,03E-06    | 5,10E-05    |
| 191 | Gm10030       | ENSMUSG00000057802  | 11,46   | 1,98 | 6,75E-06    | 0,000143138 |
| 192 | Ighv1-74      | ENSMUSG00000094124  | 3,12    | 1,98 | 7,03E-05    | 0,001020218 |
| 193 | Dio2          | ENSMUSG00000007682  | 71,66   | 1,97 | 7,29E-05    | 0,001053817 |
| 194 | Igkv12-44     | ENSMUSG00000096422  | 9,33    | 1,96 | 6,15E-05    | 0,00091292  |
| 195 | Col18a1       | ENSMUSG00000001435  | 1345,35 | 1,96 | 3,30E-12    | 3,75E-10    |
| 196 | Hepacam       | ENSMUSG00000046240  | 33,87   | 1,96 | 7,65E-14    | 1,24E-11    |
| 197 | Ighv1-85      | ENSMUSG00000096150  | 3,13    | 1,96 | 8,18E-05    | 0,001151303 |
| 198 | Gpr176        | ENSMUSG00000040133  | 5,89    | 1,95 | 2,19E-05    | 0,000386213 |
| 199 | Colec10       | ENSMUSG00000038591  | 34,64   | 1,95 | 3,59E-08    | 1,51E-06    |
| 200 | Gm30173       | ENSMUSG000000103965 | 2,31    | 1,95 | 8,36E-05    | 0,001170187 |
| 201 | Plekhg1       | ENSMUSG00000040624  | 135,5   | 1,94 | 8,80E-24    | 7,31E-21    |
| 202 | Ighv1-9       | ENSMUSG00000094694  | 21,02   | 1,94 | 3,01E-05    | 0,000498393 |
| 203 | Mmp14         | ENSMUSG00000000957  | 261,92  | 1,94 | 6,33E-14    | 1,05E-11    |
| 204 | Ighv1-69      | ENSMUSG00000094502  | 2,48    | 1,94 | 7,02E-05    | 0,001020218 |
| 205 | Cldn1         | ENSMUSG00000022512  | 18,96   | 1,94 | 1,18E-05    | 0,00023101  |
| 206 | Cd247         | ENSMUSG00000005763  | 7,03    | 1,94 | 1,01E-05    | 0,000202844 |
| 207 | Fam167b       | ENSMUSG00000050493  | 12,58   | 1,94 | 3,31E-06    | 7,77E-05    |
| 208 | Cd44          | ENSMUSG00000005087  | 1789,43 | 1,94 | 2,85E-12    | 3,38E-10    |
| 209 | Igf2os        | ENSMUSG00000086266  | 8,33    | 1,93 | 6,76E-05    | 0,000988331 |
| 210 | Rbp1          | ENSMUSG00000046402  | 734,83  | 1,92 | 6,45E-06    | 0,000138055 |
| 211 | Slc17a4       | ENSMUSG00000021336  | 15,52   | 1,92 | 4,20E-07    | 1,32E-05    |
| 212 | Igkv5-43      | ENSMUSG00000094433  | 13,02   | 1,92 | 7,89E-05    | 0,001118793 |
| 213 | Phlda3        | ENSMUSG00000041801  | 24,29   | 1,92 | 1,84E-09    | 1,10E-07    |
| 214 | Npr3          | ENSMUSG00000022206  | 67,68   | 1,92 | 1,94E-10    | 1,49E-08    |
| 215 | Ereg          | ENSMUSG00000029377  | 248,66  | 1,92 | 2,53E-05    | 0,000432164 |
| 216 | 4833423E24Rik | ENSMUSG00000075217  | 5,39    | 1,92 | 6,39E-05    | 0,000942415 |
| 217 | Cxcl14        | ENSMUSG00000021508  | 277,89  | 1,91 | 1,35E-15    | 3,28E-13    |
| 218 | Padi1         | ENSMUSG00000025329  | 32,22   | 1,91 | 9,10E-08    | 3,36E-06    |
| 219 | Gm15595       | ENSMUSG00000080767  | 8,84    | 1,91 | 6,62E-06    | 0,000141276 |
| 220 | Npy           | ENSMUSG00000029819  | 62,49   | 1,91 | 3,63E-05    | 0,000581489 |
| 221 | Fscn1         | ENSMUSG00000029581  | 55,88   | 1,91 | 6,14E-08    | 2,38E-06    |
| 222 | Pigr          | ENSMUSG00000026417  | 5214,98 | 1,9  | 7,19E-05    | 0,001041477 |
| 223 | Gprc5b        | ENSMUSG00000008734  | 77,5    | 1,9  | 2,54E-07    | 8,36E-06    |
| 224 | Padi6         | ENSMUSG00000040935  | 102,79  | 1,9  | 0,000149655 | 0,001885476 |



|     |                |                     |         |      |             |             |
|-----|----------------|---------------------|---------|------|-------------|-------------|
| 225 | Gata3          | ENSMUSG00000015619  | 22,6    | 1,9  | 1,45E-10    | 1,14E-08    |
| 226 | Ighv1-4        | ENSMUSG00000095442  | 5,15    | 1,89 | 0,000110457 | 0,001476358 |
| 227 | Clec2f         | ENSMUSG00000089728  | 12,57   | 1,89 | 7,87E-05    | 0,001118793 |
| 228 | Ighv1-75       | ENSMUSG00000096020  | 4,09    | 1,89 | 0,00015251  | 0,001910067 |
| 229 | Pcdhb11        | ENSMUSG00000051486  | 36,26   | 1,89 | 4,75E-07    | 1,46E-05    |
| 230 | Galnt16        | ENSMUSG00000061864  | 2,93    | 1,89 | 0,00014481  | 0,001840378 |
| 231 | Ighv1-82       | ENSMUSG00000095127  | 12,04   | 1,88 | 0,000122522 | 0,00160084  |
| 232 | Igkv3-1        | ENSMUSG00000095682  | 2,76    | 1,88 | 0,000108801 | 0,001457564 |
| 233 | Ccdc129        | ENSMUSG00000037973  | 25,86   | 1,88 | 4,70E-06    | 0,000104198 |
| 234 | Ctgf           | ENSMUSG00000019997  | 212,37  | 1,88 | 9,78E-10    | 6,34E-08    |
| 235 | Akp3           | ENSMUSG00000036500  | 34,83   | 1,87 | 0,000182676 | 0,002217614 |
| 236 | Col12a1        | ENSMUSG00000032332  | 1070,19 | 1,87 | 1,18E-16    | 3,51E-14    |
| 237 | Akr1b7         | ENSMUSG00000052131  | 27,34   | 1,86 | 4,45E-09    | 2,42E-07    |
| 238 | Tbx20          | ENSMUSG00000031965  | 2,21    | 1,86 | 0,000178033 | 0,002169016 |
| 239 | Cldn2          | ENSMUSG00000047230  | 1938,86 | 1,86 | 0,000173752 | 0,002130251 |
| 240 | RP24-330A11.12 | ENSMUSG000000106123 | 5,67    | 1,85 | 3,57E-05    | 0,000574353 |
| 241 | Ilf6           | ENSMUSG00000026984  | 31,39   | 1,85 | 0,000194469 | 0,002336236 |
| 242 | Emp1           | ENSMUSG00000030208  | 1975,62 | 1,85 | 3,20E-12    | 3,65E-10    |
| 243 | S100a8         | ENSMUSG00000056054  | 47,43   | 1,85 | 0,000150336 | 0,001893033 |
| 244 | Nptx2          | ENSMUSG00000059991  | 56,01   | 1,84 | 3,83E-10    | 2,70E-08    |
| 245 | Gm10827        | ENSMUSG00000096977  | 2,3     | 1,84 | 0,000175543 | 0,002147002 |
| 246 | Jchain         | ENSMUSG00000067149  | 498,99  | 1,84 | 3,60E-05    | 0,000577851 |
| 247 | Prr18          | ENSMUSG00000055945  | 34,74   | 1,84 | 2,72E-09    | 1,58E-07    |
| 248 | Ikzf4          | ENSMUSG00000002578  | 19,69   | 1,83 | 2,09E-05    | 0,000373022 |
| 249 | Ilf1rn         | ENSMUSG00000026981  | 372,65  | 1,83 | 1,32E-18    | 5,22E-16    |
| 250 | Gp2            | ENSMUSG00000030954  | 93,31   | 1,83 | 0,000223493 | 0,002609477 |
| 251 | Chrna10        | ENSMUSG00000066279  | 21,17   | 1,83 | 9,20E-07    | 2,58E-05    |
| 252 | Zdhhc15        | ENSMUSG00000033906  | 45,57   | 1,83 | 5,77E-10    | 3,94E-08    |
| 253 | Sh3kbp1        | ENSMUSG00000040990  | 390,54  | 1,83 | 4,04E-12    | 4,43E-10    |
| 254 | Thy1           | ENSMUSG00000032011  | 80,85   | 1,82 | 6,65E-11    | 5,75E-09    |
| 255 | Bmper          | ENSMUSG00000031963  | 51,56   | 1,82 | 2,23E-13    | 3,30E-11    |
| 256 | Gm15848        | ENSMUSG00000086706  | 6,52    | 1,82 | 3,24E-05    | 0,000527551 |
| 257 | Cd6            | ENSMUSG00000024670  | 3,87    | 1,82 | 0,000235824 | 0,002727447 |
| 258 | Lgi2           | ENSMUSG00000039252  | 99,68   | 1,82 | 4,87E-07    | 1,49E-05    |
| 259 | Ifi203         | ENSMUSG00000039997  | 108,43  | 1,82 | 9,09E-12    | 9,36E-10    |
| 260 | Gpx2-ps1       | ENSMUSG00000089987  | 4,15    | 1,82 | 0,000149432 | 0,001883683 |
| 261 | Bdkrb2         | ENSMUSG00000021070  | 54,22   | 1,82 | 4,74E-09    | 2,57E-07    |
| 262 | Sfn1           | ENSMUSG00000078763  | 3,93    | 1,82 | 0,000232303 | 0,002693413 |
| 263 | Syt15          | ENSMUSG00000041479  | 30,39   | 1,81 | 5,71E-09    | 3,03E-07    |
| 264 | Aldoc          | ENSMUSG00000017390  | 240,73  | 1,81 | 5,62E-10    | 3,84E-08    |
| 265 | Gm14085        | ENSMUSG00000079071  | 10,2    | 1,81 | 6,38E-05    | 0,000941742 |
| 266 | 4930515B02Rik  | ENSMUSG00000087045  | 1,9     | 1,81 | 0,00024612  | 0,002817967 |
| 267 | 4930502E18Rik  | ENSMUSG00000055555  | 2,8     | 1,81 | 0,00028807  | 0,003221233 |
| 268 | Ilf33          | ENSMUSG00000024810  | 535,54  | 1,81 | 0,000139106 | 0,00178642  |
| 269 | Pcdhb22        | ENSMUSG00000073591  | 26,03   | 1,8  | 1,46E-07    | 5,13E-06    |

|     |               |                    |        |      |             |             |
|-----|---------------|--------------------|--------|------|-------------|-------------|
| 270 | Il1rl2        | ENSMUSG00000070942 | 83,85  | 1,8  | 1,49E-12    | 1,88E-10    |
| 271 | Ephb2         | ENSMUSG00000028664 | 290,65 | 1,8  | 2,19E-11    | 2,10E-09    |
| 272 | St8sia1       | ENSMUSG00000030283 | 13,83  | 1,8  | 3,59E-05    | 0,000577258 |
| 273 | Ighv9-3       | ENSMUSG00000096459 | 33,4   | 1,8  | 0,000264485 | 0,002990554 |
| 274 | Tprg          | ENSMUSG00000048399 | 32,7   | 1,8  | 9,62E-06    | 0,000194074 |
| 275 | Madcam1       | ENSMUSG00000020310 | 10,41  | 1,8  | 2,00E-05    | 0,000359823 |
| 276 | Cd14          | ENSMUSG00000051439 | 238,41 | 1,8  | 1,83E-11    | 1,79E-09    |
| 277 | Itga2         | ENSMUSG00000015533 | 198,56 | 1,8  | 1,26E-10    | 1,01E-08    |
| 278 | Gm26703       | ENSMUSG00000097877 | 2,1    | 1,79 | 0,000305031 | 0,0033688   |
| 279 | Pcdhb17       | ENSMUSG00000046387 | 35,97  | 1,79 | 9,10E-07    | 2,55E-05    |
| 280 | C1qtnf9       | ENSMUSG00000071347 | 23,25  | 1,79 | 2,43E-06    | 5,96E-05    |
| 281 | Igkv10-96     | ENSMUSG00000094420 | 49,35  | 1,79 | 8,44E-06    | 0,000174237 |
| 282 | Mzb1          | ENSMUSG00000024353 | 9,14   | 1,79 | 9,01E-05    | 0,001244589 |
| 283 | Draxin        | ENSMUSG00000029005 | 6,52   | 1,79 | 0,000121861 | 0,001593982 |
| 284 | Casp1         | ENSMUSG00000025888 | 55,48  | 1,78 | 9,95E-10    | 6,41E-08    |
| 285 | Bcl11b        | ENSMUSG00000048251 | 53,96  | 1,78 | 3,31E-06    | 7,77E-05    |
| 286 | Dgkh          | ENSMUSG00000034731 | 28,77  | 1,78 | 3,14E-10    | 2,26E-08    |
| 287 | Cldn4         | ENSMUSG00000047501 | 104,28 | 1,78 | 6,59E-05    | 0,000965655 |
| 288 | Cd93          | ENSMUSG00000027435 | 560,7  | 1,78 | 1,30E-14    | 2,56E-12    |
| 289 | P2ry2         | ENSMUSG00000032860 | 10,5   | 1,77 | 3,18E-05    | 0,0005207   |
| 290 | Slc22a13b-ps  | ENSMUSG00000092212 | 8,81   | 1,77 | 2,42E-05    | 0,000415945 |
| 291 | Tnf           | ENSMUSG00000024401 | 10,83  | 1,77 | 3,48E-05    | 0,000561244 |
| 292 | Mcpt1         | ENSMUSG00000022227 | 99,51  | 1,77 | 0,000416421 | 0,004364918 |
| 293 | Timp1         | ENSMUSG00000001131 | 45,37  | 1,77 | 7,41E-06    | 0,00015541  |
| 294 | Slc4a11       | ENSMUSG00000074796 | 14,48  | 1,77 | 4,44E-05    | 0,000689414 |
| 295 | Igkv8-28      | ENSMUSG00000094356 | 15,35  | 1,77 | 0,000425292 | 0,004431946 |
| 296 | Aplnr         | ENSMUSG00000044338 | 55,83  | 1,76 | 3,17E-12    | 3,64E-10    |
| 297 | Olfm4         | ENSMUSG00000022026 | 63,62  | 1,76 | 0,000432982 | 0,004499994 |
| 298 | Ighv6-3       | ENSMUSG00000076677 | 12,59  | 1,76 | 0,000125514 | 0,001629864 |
| 299 | Blk           | ENSMUSG00000014453 | 4,89   | 1,76 | 0,000412954 | 0,00433604  |
| 300 | Cnm1          | ENSMUSG00000025189 | 6,27   | 1,76 | 6,22E-05    | 0,000921943 |
| 301 | Fam216a       | ENSMUSG00000029463 | 15,22  | 1,76 | 9,74E-05    | 0,00133011  |
| 302 | Mndal         | ENSMUSG00000090272 | 116,02 | 1,76 | 1,02E-12    | 1,34E-10    |
| 303 | Slc35f1       | ENSMUSG00000038602 | 6,42   | 1,75 | 8,17E-05    | 0,001150788 |
| 304 | Runx2         | ENSMUSG00000039153 | 34,16  | 1,74 | 9,36E-08    | 3,44E-06    |
| 305 | Ptf1aos       | ENSMUSG00000085388 | 5,89   | 1,74 | 0,000169279 | 0,002083085 |
| 306 | Trdv4         | ENSMUSG00000076867 | 2,8    | 1,74 | 0,000433978 | 0,004508336 |
| 307 | Tmem71        | ENSMUSG00000036944 | 19,49  | 1,74 | 6,96E-07    | 2,03E-05    |
| 308 | Hopx          | ENSMUSG00000059325 | 27,23  | 1,73 | 2,78E-05    | 0,000468103 |
| 309 | Dkk2          | ENSMUSG00000028031 | 15,21  | 1,73 | 0,000128022 | 0,00165965  |
| 310 | Spink1        | ENSMUSG00000024503 | 7,04   | 1,73 | 0,000515613 | 0,005223471 |
| 311 | Gm37093       | ENSMUSG00000103188 | 2,9    | 1,72 | 0,000540285 | 0,005422541 |
| 312 | Gm16548       | ENSMUSG00000086593 | 3,03   | 1,72 | 0,000497216 | 0,005063549 |
| 313 | Samd5         | ENSMUSG00000060487 | 245,04 | 1,72 | 3,68E-10    | 2,61E-08    |
| 314 | 1700066B19Rik | ENSMUSG00000073598 | 114,01 | 1,72 | 4,23E-08    | 1,73E-06    |

|     |               |                     |         |      |             |             |
|-----|---------------|---------------------|---------|------|-------------|-------------|
| 315 | Clca4b        | ENSMUSG00000074195  | 19,75   | 1,71 | 0,000297053 | 0,003299485 |
| 316 | Tcrg-C2       | ENSMUSG00000076752  | 2,85    | 1,71 | 0,000587594 | 0,005806074 |
| 317 | Ttc9          | ENSMUSG00000042734  | 16,36   | 1,71 | 8,64E-07    | 2,45E-05    |
| 318 | Ighv8-12      | ENSMUSG00000076731  | 6,37    | 1,71 | 0,000565512 | 0,005627722 |
| 319 | Ighv6-6       | ENSMUSG00000076680  | 6,18    | 1,71 | 0,000621154 | 0,006070668 |
| 320 | Esm1          | ENSMUSG00000042379  | 146,59  | 1,71 | 2,16E-07    | 7,27E-06    |
| 321 | Pcdhb16       | ENSMUSG00000047910  | 45,82   | 1,71 | 3,57E-06    | 8,24E-05    |
| 322 | Ighv1-20      | ENSMUSG00000095761  | 2,07    | 1,71 | 0,000495366 | 0,005049128 |
| 323 | Gm13212       | ENSMUSG00000078502  | 53,25   | 1,7  | 4,29E-06    | 9,67E-05    |
| 324 | Mmp3          | ENSMUSG00000043613  | 88,3    | 1,7  | 0,000494762 | 0,005045185 |
| 325 | Rtn4rl1       | ENSMUSG00000045287  | 103,04  | 1,7  | 4,76E-09    | 2,57E-07    |
| 326 | Myo7b         | ENSMUSG00000024388  | 79,31   | 1,7  | 0,000308434 | 0,003396715 |
| 327 | Igkv17-127    | ENSMUSG00000076508  | 1,83    | 1,7  | 0,000587886 | 0,005806494 |
| 328 | Fads2         | ENSMUSG00000024665  | 173,72  | 1,7  | 2,11E-06    | 5,28E-05    |
| 329 | 1700046C09Rik | ENSMUSG00000085561  | 15,73   | 1,7  | 7,70E-07    | 2,22E-05    |
| 330 | Adamts6       | ENSMUSG00000046169  | 49,76   | 1,7  | 3,82E-08    | 1,59E-06    |
| 331 | Stom          | ENSMUSG00000026880  | 308,43  | 1,69 | 1,08E-19    | 5,24E-17    |
| 332 | Gm13856       | ENSMUSG00000087356  | 4,96    | 1,69 | 0,000338674 | 0,003670674 |
| 333 | Scube1        | ENSMUSG00000016763  | 251,35  | 1,69 | 7,81E-12    | 8,12E-10    |
| 334 | Ighv1-53      | ENSMUSG00000093894  | 15,39   | 1,69 | 3,69E-05    | 0,000588563 |
| 335 | Col4a1        | ENSMUSG00000031502  | 2015,49 | 1,69 | 1,74E-14    | 3,35E-12    |
| 336 | Arl4c         | ENSMUSG00000049866  | 103,19  | 1,69 | 8,99E-07    | 2,53E-05    |
| 337 | Gm14137       | ENSMUSG00000055926  | 13,42   | 1,69 | 4,31E-06    | 9,69E-05    |
| 338 | Cd38          | ENSMUSG00000029084  | 169,36  | 1,69 | 1,60E-11    | 1,59E-09    |
| 339 | Wfdc2         | ENSMUSG00000017723  | 376,06  | 1,68 | 1,11E-05    | 0,000219508 |
| 340 | Slamf6        | ENSMUSG00000015314  | 6,56    | 1,68 | 0,000208602 | 0,002476612 |
| 341 | Cpne4         | ENSMUSG00000032564  | 28,72   | 1,68 | 6,17E-07    | 1,84E-05    |
| 342 | RP23-195A18.3 | ENSMUSG000000106214 | 1,88    | 1,68 | 0,00074052  | 0,007004839 |
| 343 | Igha          | ENSMUSG00000095079  | 1370,33 | 1,67 | 0,000347616 | 0,003758839 |
| 344 | Igkv2-109     | ENSMUSG000000105606 | 13,47   | 1,67 | 0,00025633  | 0,002915348 |
| 345 | F2rl3         | ENSMUSG00000050147  | 13,66   | 1,67 | 2,61E-05    | 0,000444243 |
| 346 | Abo           | ENSMUSG00000015787  | 143,81  | 1,67 | 1,07E-06    | 2,92E-05    |
| 347 | Cxcr4         | ENSMUSG00000045382  | 137,61  | 1,67 | 1,68E-09    | 1,02E-07    |
| 348 | Ms4a4b        | ENSMUSG00000056290  | 9,02    | 1,67 | 0,000423793 | 0,004427708 |
| 349 | H2-Q7         | ENSMUSG00000060550  | 17,69   | 1,67 | 0,000222861 | 0,002606764 |
| 350 | Stard13       | ENSMUSG00000016128  | 1794,5  | 1,66 | 2,25E-10    | 1,69E-08    |
| 351 | Tcrg-V6       | ENSMUSG00000076746  | 2,97    | 1,66 | 0,000587232 | 0,005804966 |
| 352 | Cpz           | ENSMUSG00000036596  | 18,4    | 1,66 | 5,30E-05    | 0,000802181 |
| 353 | C4b           | ENSMUSG00000073418  | 971,86  | 1,66 | 7,63E-07    | 2,21E-05    |
| 354 | Rspo2         | ENSMUSG00000051920  | 6,04    | 1,66 | 0,000442459 | 0,004580078 |
| 355 | Gm37531       | ENSMUSG000000103696 | 18,17   | 1,66 | 4,28E-06    | 9,65E-05    |
| 356 | Slc6a12       | ENSMUSG00000030109  | 44,37   | 1,66 | 6,04E-10    | 4,11E-08    |
| 357 | Trdc          | ENSMUSG000000104876 | 9,5     | 1,66 | 0,000734371 | 0,006969851 |
| 358 | Slc30a10      | ENSMUSG00000026614  | 6,39    | 1,66 | 0,000669464 | 0,006463503 |
| 359 | Atp6v0d2      | ENSMUSG00000028238  | 553,39  | 1,65 | 0,000759142 | 0,007134583 |

|     |               |                    |         |      |             |             |
|-----|---------------|--------------------|---------|------|-------------|-------------|
| 360 | Igkv4-55      | ENSMUSG00000096833 | 6,23    | 1,65 | 0,000926946 | 0,008396279 |
| 361 | Gm37233       | ENSMUSG00000102336 | 18,36   | 1,65 | 2,27E-06    | 5,61E-05    |
| 362 | Cyp2d34       | ENSMUSG00000094559 | 30,08   | 1,65 | 0,000168703 | 0,0020771   |
| 363 | Wif1          | ENSMUSG00000020218 | 15,1    | 1,65 | 7,54E-06    | 0,000157547 |
| 364 | Alpi          | ENSMUSG00000079440 | 964,27  | 1,65 | 0,000899886 | 0,008192623 |
| 365 | Ramp3         | ENSMUSG00000041046 | 11,66   | 1,65 | 0,000474814 | 0,004867364 |
| 366 | Igkc          | ENSMUSG00000076609 | 1186,24 | 1,65 | 0,000407028 | 0,004289649 |
| 367 | Pcdhb3        | ENSMUSG00000045498 | 11,45   | 1,65 | 0,000100112 | 0,001358257 |
| 368 | 4933407L21Rik | ENSMUSG00000026224 | 1,97    | 1,65 | 0,000916851 | 0,008321033 |
| 369 | Glp1r         | ENSMUSG00000024027 | 217,51  | 1,64 | 0,000300601 | 0,003329355 |
| 370 | Trf           | ENSMUSG00000032554 | 77,77   | 1,64 | 5,00E-13    | 7,00E-11    |
| 371 | Ighv1-58      | ENSMUSG00000095889 | 7,27    | 1,64 | 0,0008655   | 0,007954263 |
| 372 | Gm12707       | ENSMUSG00000085835 | 5,79    | 1,64 | 0,000379297 | 0,004037618 |
| 373 | Reg3g         | ENSMUSG00000030017 | 296,15  | 1,64 | 0,001070083 | 0,009410745 |
| 374 | Gm15693       | ENSMUSG00000082485 | 3,08    | 1,64 | 0,001001922 | 0,008932846 |
| 375 | Cfh           | ENSMUSG00000026365 | 570,85  | 1,64 | 2,84E-30    | 5,08E-27    |
| 376 | Gm34294       | ENSMUSG00000103662 | 4,55    | 1,64 | 0,000736456 | 0,006983426 |
| 377 | Il6           | ENSMUSG00000025746 | 18,48   | 1,64 | 0,00069326  | 0,0066497   |
| 378 | Muc2          | ENSMUSG00000025515 | 206,62  | 1,64 | 0,000956044 | 0,008599588 |
| 379 | Plekhs1       | ENSMUSG00000035818 | 61,97   | 1,64 | 9,40E-07    | 2,62E-05    |
| 380 | Adamts4       | ENSMUSG00000006403 | 72,36   | 1,63 | 2,99E-09    | 1,73E-07    |
| 381 | Ighv1-21      | ENSMUSG00000102654 | 2,33    | 1,63 | 0,00092969  | 0,008404772 |
| 382 | Xpnpep2       | ENSMUSG00000037005 | 8,16    | 1,63 | 0,000185973 | 0,002248097 |
| 383 | Cxcl3         | ENSMUSG00000029379 | 10,09   | 1,63 | 0,001054794 | 0,009315015 |
| 384 | Gm11251       | ENSMUSG00000084162 | 50,45   | 1,63 | 7,56E-05    | 0,001084962 |
| 385 | Grrp1         | ENSMUSG00000050105 | 8,27    | 1,63 | 7,47E-05    | 0,001076833 |
| 386 | Gm5475        | ENSMUSG00000087444 | 1,6     | 1,63 | 0,00081763  | 0,007592281 |
| 387 | Bdkrb1        | ENSMUSG00000041347 | 3,23    | 1,62 | 0,000738267 | 0,0069949   |
| 388 | Prss22        | ENSMUSG00000045027 | 4,46    | 1,62 | 0,001024446 | 0,009099291 |
| 389 | Akap3         | ENSMUSG00000030344 | 9,53    | 1,62 | 0,000872941 | 0,008006833 |
| 390 | Shc2          | ENSMUSG00000020312 | 48,42   | 1,62 | 8,61E-07    | 2,44E-05    |
| 391 | Rnf182        | ENSMUSG00000044164 | 11,27   | 1,62 | 1,38E-05    | 0,000262825 |
| 392 | Cemip         | ENSMUSG00000052353 | 265,74  | 1,62 | 0,000408859 | 0,00430505  |
| 393 | Khdc1c        | ENSMUSG00000041722 | 1,64    | 1,62 | 0,000940055 | 0,008474958 |
| 394 | Mab21l3       | ENSMUSG00000044313 | 4,43    | 1,62 | 0,000840425 | 0,007763671 |
| 395 | Ighv10-1      | ENSMUSG00000095981 | 8,52    | 1,62 | 0,001211895 | 0,010364559 |
| 396 | Gm15834       | ENSMUSG00000085054 | 105,24  | 1,62 | 1,28E-09    | 7,99E-08    |
| 397 | Ighv1-67      | ENSMUSG00000095863 | 1,62    | 1,61 | 0,001143901 | 0,009939718 |
| 398 | Igfbp4        | ENSMUSG00000017493 | 1862,32 | 1,61 | 7,49E-08    | 2,84E-06    |
| 399 | Ibsp          | ENSMUSG00000029306 | 6,26    | 1,61 | 0,001253644 | 0,010650706 |
| 400 | Igkv12-46     | ENSMUSG00000076564 | 14,73   | 1,61 | 0,00038515  | 0,004094309 |
| 401 | Depdc5        | ENSMUSG00000037426 | 277,34  | 1,61 | 4,27E-07    | 1,33E-05    |
| 402 | Aim2          | ENSMUSG00000037860 | 198,55  | 1,61 | 3,55E-14    | 6,22E-12    |
| 403 | Trim15        | ENSMUSG00000050747 | 32,21   | 1,61 | 1,50E-06    | 3,94E-05    |
| 404 | BC035947      | ENSMUSG00000090486 | 18,19   | 1,61 | 0,000178991 | 0,002177277 |

|     |               |                     |         |      |             |             |
|-----|---------------|---------------------|---------|------|-------------|-------------|
| 405 | Gm37192       | ENSMUSG000000102184 | 2,27    | 1,61 | 0,001207522 | 0,010341935 |
| 406 | Ldlrad4       | ENSMUSG000000024544 | 71,11   | 1,61 | 1,54E-08    | 7,33E-07    |
| 407 | Sox4          | ENSMUSG000000076431 | 112,36  | 1,6  | 2,86E-09    | 1,66E-07    |
| 408 | Ighv14-3      | ENSMUSG000000095642 | 6,76    | 1,6  | 0,000821523 | 0,00762234  |
| 409 | Sord          | ENSMUSG000000027227 | 510,79  | 1,6  | 3,52E-11    | 3,24E-09    |
| 410 | Abca1         | ENSMUSG000000015243 | 570,15  | 1,6  | 7,55E-21    | 4,29E-18    |
| 411 | Ighv2-9-1     | ENSMUSG000000095565 | 5,03    | 1,6  | 0,00136766  | 0,011374354 |
| 412 | C2cd4c        | ENSMUSG000000045912 | 26,52   | 1,6  | 2,70E-06    | 6,51E-05    |
| 413 | Saa3          | ENSMUSG000000040026 | 13,82   | 1,6  | 0,001001706 | 0,008932846 |
| 414 | Tnfai3        | ENSMUSG000000044469 | 63,3    | 1,59 | 3,57E-07    | 1,13E-05    |
| 415 | 9930038B18Rik | ENSMUSG000000042976 | 2,86    | 1,59 | 0,001383943 | 0,011472869 |
| 416 | Cxcr2         | ENSMUSG000000026180 | 7,37    | 1,59 | 0,000360534 | 0,003878702 |
| 417 | Gm29453       | ENSMUSG000000101724 | 3,47    | 1,59 | 0,00069008  | 0,006624658 |
| 418 | Igkv6-15      | ENSMUSG000000094797 | 25,85   | 1,59 | 0,00028715  | 0,003215583 |
| 419 | Igkv4-57      | ENSMUSG000000076556 | 6,65    | 1,59 | 0,001399666 | 0,011578468 |
| 420 | Slc22a13      | ENSMUSG000000074028 | 14,9    | 1,59 | 1,88E-05    | 0,000339618 |
| 421 | Ucn3          | ENSMUSG000000044988 | 2,84    | 1,59 | 0,000922666 | 0,008360761 |
| 422 | 1810011H11Rik | ENSMUSG000000041707 | 23,08   | 1,59 | 4,68E-08    | 1,90E-06    |
| 423 | Reg3b         | ENSMUSG000000071356 | 931,13  | 1,59 | 0,00110056  | 0,009627827 |
| 424 | Galnt18       | ENSMUSG000000038296 | 61,95   | 1,58 | 2,19E-06    | 5,45E-05    |
| 425 | Cep72         | ENSMUSG000000021572 | 63,39   | 1,58 | 1,44E-07    | 5,06E-06    |
| 426 | Ighv7-3       | ENSMUSG000000076652 | 12,83   | 1,58 | 0,000631789 | 0,006153922 |
| 427 | Nes           | ENSMUSG000000004891 | 237,74  | 1,58 | 4,17E-10    | 2,91E-08    |
| 428 | Igkv14-100    | ENSMUSG000000096515 | 17,61   | 1,57 | 0,000666798 | 0,006441004 |
| 429 | Fam179a       | ENSMUSG000000045761 | 3,08    | 1,57 | 0,001382829 | 0,01146772  |
| 430 | Pax9          | ENSMUSG000000001497 | 22,64   | 1,56 | 2,87E-05    | 0,000479274 |
| 431 | F5            | ENSMUSG000000026579 | 1152,25 | 1,56 | 0,000161111 | 0,001992055 |
| 432 | Col4a2        | ENSMUSG000000031503 | 979,58  | 1,56 | 5,12E-11    | 4,56E-09    |
| 433 | Tie1          | ENSMUSG000000033191 | 81,66   | 1,56 | 9,29E-08    | 3,42E-06    |
| 434 | Pcdhb14       | ENSMUSG000000044043 | 27,69   | 1,56 | 3,46E-06    | 8,05E-05    |
| 435 | Fpr1          | ENSMUSG000000045551 | 4,69    | 1,56 | 0,001045675 | 0,00923799  |
| 436 | Ppm1j         | ENSMUSG000000002228 | 19,27   | 1,55 | 6,66E-06    | 0,00014187  |
| 437 | Ndufa4l2      | ENSMUSG000000040280 | 11,49   | 1,55 | 0,000303161 | 0,003354241 |
| 438 | Igkv12-89     | ENSMUSG000000076534 | 7,55    | 1,55 | 0,001609591 | 0,012954012 |
| 439 | Igfn1         | ENSMUSG000000051985 | 12,57   | 1,55 | 8,67E-05    | 0,001206855 |
| 440 | Gm28884       | ENSMUSG000000099767 | 2,82    | 1,55 | 0,001824278 | 0,014375531 |
| 441 | Tmem190       | ENSMUSG000000013091 | 20,88   | 1,55 | 1,60E-06    | 4,15E-05    |
| 442 | Sorcs2        | ENSMUSG000000029093 | 69,36   | 1,55 | 1,02E-06    | 2,82E-05    |
| 443 | Ccl5          | ENSMUSG000000035042 | 4,51    | 1,55 | 0,001902535 | 0,014906393 |
| 444 | Fn1           | ENSMUSG000000026193 | 2379,05 | 1,55 | 2,88E-12    | 3,40E-10    |
| 445 | Ace2          | ENSMUSG000000015405 | 7,1     | 1,55 | 0,000838855 | 0,007755329 |
| 446 | Krt83         | ENSMUSG000000047641 | 7,86    | 1,54 | 0,000475202 | 0,004869204 |
| 447 | Tns4          | ENSMUSG000000017607 | 214,36  | 1,54 | 3,75E-08    | 1,56E-06    |
| 448 | Lrrk2         | ENSMUSG000000036273 | 119,53  | 1,54 | 3,06E-07    | 9,80E-06    |
| 449 | Ush1c         | ENSMUSG000000030838 | 12,67   | 1,54 | 0,000892889 | 0,008138544 |

|     |               |                     |        |      |             |             |
|-----|---------------|---------------------|--------|------|-------------|-------------|
| 450 | Igf1          | ENSMUSG00000020053  | 843,84 | 1,53 | 1,09E-10    | 8,99E-09    |
| 451 | Ctla2a        | ENSMUSG00000044258  | 148,95 | 1,53 | 8,02E-08    | 3,03E-06    |
| 452 | Igkv16-104    | ENSMUSG00000076522  | 26,37  | 1,53 | 0,000267517 | 0,003017511 |
| 453 | Gm16315       | ENSMUSG00000090230  | 2,38   | 1,53 | 0,001846836 | 0,014528623 |
| 454 | Tnfsf11       | ENSMUSG00000022015  | 5,04   | 1,53 | 0,001989201 | 0,015439862 |
| 455 | Cnfn          | ENSMUSG00000063651  | 10,67  | 1,53 | 0,000790966 | 0,007388908 |
| 456 | Cxcl2         | ENSMUSG00000058427  | 42,81  | 1,53 | 0,00193067  | 0,015076068 |
| 457 | Prrg4         | ENSMUSG00000027171  | 72,98  | 1,53 | 9,29E-06    | 0,000188797 |
| 458 | Slc26a3       | ENSMUSG00000001225  | 19,8   | 1,53 | 0,001261568 | 0,010706304 |
| 459 | Gm16685       | ENSMUSG00000097804  | 5,16   | 1,52 | 0,00105963  | 0,009343534 |
| 460 | Ighv1-50      | ENSMUSG00000094198  | 2,95   | 1,52 | 0,002255023 | 0,017042674 |
| 461 | Erich3        | ENSMUSG00000078161  | 76,26  | 1,52 | 1,00E-05    | 0,000201311 |
| 462 | Kcnj8         | ENSMUSG00000030247  | 76,27  | 1,52 | 4,59E-07    | 1,42E-05    |
| 463 | Cd5           | ENSMUSG00000024669  | 4,16   | 1,52 | 0,002025019 | 0,015639627 |
| 464 | Prss12        | ENSMUSG00000027978  | 23,33  | 1,52 | 0,000284691 | 0,00319419  |
| 465 | Tdgf1         | ENSMUSG00000032494  | 19,25  | 1,52 | 1,04E-05    | 0,000206957 |
| 466 | Gm5530        | ENSMUSG00000087008  | 51,58  | 1,52 | 7,31E-09    | 3,75E-07    |
| 467 | Ighj1         | ENSMUSG00000076621  | 1,64   | 1,52 | 0,001288314 | 0,010861981 |
| 468 | BC025446      | ENSMUSG00000047728  | 11,48  | 1,51 | 0,00039074  | 0,00414238  |
| 469 | Pdxk          | ENSMUSG00000032788  | 240,29 | 1,51 | 4,40E-14    | 7,58E-12    |
| 470 | Rasal1        | ENSMUSG00000029602  | 8,7    | 1,51 | 0,000724045 | 0,006905135 |
| 471 | Slnf4         | ENSMUSG00000000204  | 32,39  | 1,51 | 4,43E-05    | 0,000688842 |
| 472 | Tshz2         | ENSMUSG00000047907  | 55,17  | 1,51 | 0,000174751 | 0,002139109 |
| 473 | A930024N18Rik | ENSMUSG00000097566  | 1,72   | 1,51 | 0,002214579 | 0,016771065 |
| 474 | Trem1         | ENSMUSG00000042265  | 3,23   | 1,51 | 0,001438567 | 0,011849719 |
| 475 | St8sia3os     | ENSMUSG00000086128  | 1,74   | 1,51 | 0,002212682 | 0,016766238 |
| 476 | Gm10384       | ENSMUSG00000072618  | 19,57  | 1,51 | 4,35E-05    | 0,000677989 |
| 477 | Trpa1         | ENSMUSG00000032769  | 39,78  | 1,51 | 1,03E-07    | 3,75E-06    |
| 478 | Hkdc1         | ENSMUSG00000020080  | 58,37  | 1,5  | 2,33E-06    | 5,74E-05    |
| 479 | Kcne3         | ENSMUSG00000035165  | 730,48 | 1,5  | 0,000397748 | 0,004205182 |
| 480 | Igkv1-110     | ENSMUSG00000093861  | 39,71  | 1,5  | 0,001944923 | 0,015167013 |
| 481 | Krt5          | ENSMUSG00000061527  | 8,62   | 1,5  | 0,00119545  | 0,01026454  |
| 482 | Car8          | ENSMUSG00000041261  | 300,85 | 1,5  | 2,49E-08    | 1,10E-06    |
| 483 | Dact2         | ENSMUSG00000048826  | 12,46  | 1,5  | 0,000204013 | 0,00242709  |
| 484 | Actn1         | ENSMUSG00000015143  | 740,83 | 1,5  | 1,68E-10    | 1,30E-08    |
| 485 | Plekhg4       | ENSMUSG00000014782  | 2,15   | 1,5  | 0,002552488 | 0,01871854  |
| 486 | Gm13857       | ENSMUSG00000084965  | 14,73  | 1,5  | 2,34E-05    | 0,000405931 |
| 487 | 9030619P08Rik | ENSMUSG00000053168  | 6,49   | 1,5  | 0,001169207 | 0,01010678  |
| 488 | Igkv12-41     | ENSMUSG00000095007  | 5,21   | 1,49 | 0,002531235 | 0,018604494 |
| 489 | Wisp1         | ENSMUSG00000005124  | 69,74  | 1,49 | 1,16E-07    | 4,19E-06    |
| 490 | Cd37          | ENSMUSG00000030798  | 21,14  | 1,49 | 1,89E-06    | 4,81E-05    |
| 491 | AU020206      | ENSMUSG00000097415  | 13,5   | 1,49 | 0,000358176 | 0,003855114 |
| 492 | Gm14393       | ENSMUSG00000078905  | 3,18   | 1,49 | 0,002794495 | 0,020104788 |
| 493 | Vash2         | ENSMUSG00000037568  | 21,13  | 1,49 | 1,30E-05    | 0,000251974 |
| 494 | Gm19589       | ENSMUSG000000100798 | 3,14   | 1,49 | 0,001924119 | 0,015040059 |

|     |               |                     |        |      |             |             |
|-----|---------------|---------------------|--------|------|-------------|-------------|
| 495 | Gm4035        | ENSMUSG000000100760 | 2,08   | 1,49 | 0,002657883 | 0,019312437 |
| 496 | Igkv10-94     | ENSMUSG000000096490 | 8,11   | 1,48 | 0,002416678 | 0,01801284  |
| 497 | F2r           | ENSMUSG000000048376 | 538,67 | 1,48 | 1,20E-10    | 9,68E-09    |
| 498 | Pla2g2d       | ENSMUSG000000041202 | 53,04  | 1,48 | 2,39E-09    | 1,40E-07    |
| 499 | Gm10863       | ENSMUSG000000075555 | 7,06   | 1,48 | 0,001033879 | 0,009158825 |
| 500 | Btbd17        | ENSMUSG000000000202 | 7,4    | 1,48 | 0,000678005 | 0,006527586 |
| 501 | Naip5         | ENSMUSG000000071203 | 179,63 | 1,48 | 4,40E-09    | 2,40E-07    |
| 502 | Nox1          | ENSMUSG000000031257 | 3,64   | 1,48 | 0,002950838 | 0,021043826 |
| 503 | Glis3         | ENSMUSG000000052942 | 150,59 | 1,48 | 8,18E-07    | 2,34E-05    |
| 504 | Npy4r         | ENSMUSG000000048337 | 48,16  | 1,48 | 0,002164377 | 0,016496906 |
| 505 | Atp10b        | ENSMUSG000000055415 | 531,14 | 1,48 | 4,55E-14    | 7,73E-12    |
| 506 | 4930429P21Rik | ENSMUSG000000102144 | 17,53  | 1,47 | 6,45E-05    | 0,000948498 |
| 507 | RP23-275N13.1 | ENSMUSG000000107177 | 2,44   | 1,47 | 0,002912799 | 0,020823603 |
| 508 | Eng           | ENSMUSG000000026814 | 127,44 | 1,47 | 3,59E-09    | 2,00E-07    |
| 509 | Apcdd1        | ENSMUSG000000071847 | 45,32  | 1,47 | 9,76E-09    | 4,86E-07    |
| 510 | Gm7967        | ENSMUSG000000100009 | 39,98  | 1,47 | 9,24E-09    | 4,65E-07    |
| 511 | Gbp8          | ENSMUSG000000034438 | 21,2   | 1,47 | 0,000189704 | 0,002289635 |
| 512 | Slc11a2       | ENSMUSG000000023030 | 274,76 | 1,47 | 0,000107517 | 0,001442863 |
| 513 | Ighv1-28      | ENSMUSG000000102315 | 1,65   | 1,47 | 0,003045187 | 0,021592764 |
| 514 | Chrdl2        | ENSMUSG000000030732 | 8,13   | 1,47 | 0,000320934 | 0,003504525 |
| 515 | Sep.05        | ENSMUSG000000072214 | 45,49  | 1,47 | 5,17E-07    | 1,56E-05    |
| 516 | Pcdhb18       | ENSMUSG000000048347 | 19,11  | 1,47 | 0,000146303 | 0,001852268 |
| 517 | Egfl6         | ENSMUSG000000000402 | 3,91   | 1,46 | 0,003059488 | 0,021672538 |
| 518 | Car12         | ENSMUSG000000032373 | 190,54 | 1,46 | 8,18E-06    | 0,000169864 |
| 519 | Usp17le       | ENSMUSG000000043073 | 5,34   | 1,46 | 0,001070585 | 0,009411605 |
| 520 | 2610034O05Rik | ENSMUSG000000104429 | 6,09   | 1,46 | 0,002955471 | 0,021070405 |
| 521 | Tulp2         | ENSMUSG000000023467 | 18,39  | 1,46 | 0,000125339 | 0,001628499 |
| 522 | Itgb3         | ENSMUSG000000020689 | 195,93 | 1,46 | 1,63E-09    | 9,90E-08    |
| 523 | Tac1          | ENSMUSG000000061762 | 9,6    | 1,46 | 0,001215829 | 0,010383782 |
| 524 | Prss41        | ENSMUSG000000024114 | 6,38   | 1,46 | 0,002103211 | 0,016125772 |
| 525 | Ltf           | ENSMUSG000000032496 | 201,13 | 1,45 | 5,57E-10    | 3,84E-08    |
| 526 | Gimap3        | ENSMUSG000000039264 | 4,75   | 1,45 | 0,003146725 | 0,022189178 |
| 527 | Osmr          | ENSMUSG000000022146 | 177,63 | 1,45 | 2,54E-11    | 2,37E-09    |
| 528 | Gm15292       | ENSMUSG000000074441 | 3,03   | 1,45 | 0,003607058 | 0,024803855 |
| 529 | Helq          | ENSMUSG000000035266 | 927,49 | 1,45 | 0,001772174 | 0,01402193  |
| 530 | RP24-89O12.2  | ENSMUSG000000106828 | 3,31   | 1,45 | 0,003718538 | 0,025390366 |
| 531 | Siglec1       | ENSMUSG000000027322 | 116,01 | 1,45 | 2,23E-05    | 0,000390805 |
| 532 | Amtn          | ENSMUSG000000029282 | 93,1   | 1,45 | 3,58E-06    | 8,25E-05    |
| 533 | Ighv3-1       | ENSMUSG000000093838 | 6,89   | 1,45 | 0,003904693 | 0,02634451  |
| 534 | Pcdhb2        | ENSMUSG000000051599 | 5,69   | 1,44 | 0,001062524 | 0,009365506 |
| 535 | 9630028B13Rik | ENSMUSG000000051295 | 4,79   | 1,44 | 0,001314658 | 0,011026284 |
| 536 | Tnfsf13os     | ENSMUSG000000085890 | 33,93  | 1,44 | 3,20E-05    | 0,000523588 |
| 537 | Usp40         | ENSMUSG000000005501 | 686,36 | 1,44 | 6,98E-11    | 6,02E-09    |
| 538 | Gm15850       | ENSMUSG000000086264 | 2,27   | 1,44 | 0,003831579 | 0,025978133 |
| 539 | Trim29        | ENSMUSG000000032013 | 105,55 | 1,44 | 0,00367056  | 0,025157574 |

|     |               |                     |         |      |             |             |
|-----|---------------|---------------------|---------|------|-------------|-------------|
| 540 | Car5a         | ENSMUSG00000025317  | 11,24   | 1,44 | 0,000175646 | 0,002147002 |
| 541 | Gm9930        | ENSMUSG00000053980  | 9,75    | 1,44 | 0,000435717 | 0,004516316 |
| 542 | Higd1b        | ENSMUSG00000020928  | 6,2     | 1,43 | 0,000581726 | 0,005757871 |
| 543 | Gpx2          | ENSMUSG00000042808  | 1736,68 | 1,43 | 7,25E-07    | 2,11E-05    |
| 544 | Igkv5-45      | ENSMUSG00000094094  | 2,17    | 1,43 | 0,003810506 | 0,025874077 |
| 545 | Gja1          | ENSMUSG00000050953  | 449,11  | 1,43 | 4,39E-06    | 9,86E-05    |
| 546 | Pde4b         | ENSMUSG00000028525  | 150,06  | 1,43 | 2,31E-08    | 1,03E-06    |
| 547 | Pcnxl2        | ENSMUSG00000060212  | 51,89   | 1,43 | 2,15E-10    | 1,64E-08    |
| 548 | Grap          | ENSMUSG00000004837  | 20,03   | 1,43 | 2,65E-05    | 0,000448892 |
| 549 | Slc9a3        | ENSMUSG00000036123  | 358,35  | 1,43 | 0,000123966 | 0,001613364 |
| 550 | Tmem173       | ENSMUSG00000024349  | 70,13   | 1,43 | 1,55E-09    | 9,56E-08    |
| 551 | Pcdhgb8       | ENSMUSG000000103081 | 9,25    | 1,43 | 0,000545539 | 0,005462435 |
| 552 | Ascl2         | ENSMUSG00000009248  | 42,09   | 1,43 | 4,54E-06    | 0,000101283 |
| 553 | Ccna1         | ENSMUSG00000027793  | 8,29    | 1,43 | 0,000291278 | 0,003250853 |
| 554 | Gm1123        | ENSMUSG00000044860  | 13,94   | 1,42 | 0,004429442 | 0,029040826 |
| 555 | Gm6652        | ENSMUSG00000099858  | 101,02  | 1,42 | 6,70E-08    | 2,59E-06    |
| 556 | Igkv12-47     | ENSMUSG00000079543  | 7,98    | 1,42 | 0,002444118 | 0,018176611 |
| 557 | H2-Q6         | ENSMUSG00000073409  | 21,14   | 1,42 | 0,000861264 | 0,007921582 |
| 558 | Prss27        | ENSMUSG00000050762  | 1,87    | 1,42 | 0,004224459 | 0,027990647 |
| 559 | Mmp13         | ENSMUSG00000050578  | 147,22  | 1,42 | 0,003292675 | 0,023024017 |
| 560 | Ecscr         | ENSMUSG00000073599  | 69,46   | 1,42 | 8,88E-07    | 2,51E-05    |
| 561 | Cntnap5b      | ENSMUSG00000067028  | 40,81   | 1,42 | 1,13E-06    | 3,06E-05    |
| 562 | Cd3e          | ENSMUSG00000032093  | 11,73   | 1,42 | 0,001485938 | 0,012166707 |
| 563 | Ltb           | ENSMUSG00000024399  | 7,42    | 1,42 | 0,001268809 | 0,010744249 |
| 564 | Gm2670        | ENSMUSG00000097002  | 4,34    | 1,42 | 0,002342782 | 0,017597332 |
| 565 | Olfcr78       | ENSMUSG00000043366  | 6,77    | 1,41 | 0,000745538 | 0,007039769 |
| 566 | Colec12       | ENSMUSG00000036103  | 202,26  | 1,41 | 1,02E-13    | 1,58E-11    |
| 567 | Azin2         | ENSMUSG00000028789  | 24      | 1,41 | 9,79E-05    | 0,001334936 |
| 568 | S1pr1         | ENSMUSG00000045092  | 82,41   | 1,41 | 3,95E-08    | 1,63E-06    |
| 569 | Gm29016       | ENSMUSG00000099922  | 48,75   | 1,41 | 4,03E-05    | 0,000635164 |
| 570 | RP24-370B22.3 | ENSMUSG000000106073 | 3,81    | 1,41 | 0,003265117 | 0,022878958 |
| 571 | Tmem45a       | ENSMUSG00000022754  | 303,45  | 1,4  | 0,000252628 | 0,002880279 |
| 572 | Ednrb         | ENSMUSG00000022122  | 253,76  | 1,4  | 1,39E-09    | 8,63E-08    |
| 573 | Nhs           | ENSMUSG00000059493  | 16,02   | 1,4  | 1,25E-05    | 0,000244338 |
| 574 | Gm28411       | ENSMUSG00000099811  | 65,87   | 1,4  | 1,07E-05    | 0,000212526 |
| 575 | Gbx2          | ENSMUSG00000034486  | 2,06    | 1,4  | 0,004949481 | 0,031597922 |
| 576 | Add2          | ENSMUSG00000030000  | 35,3    | 1,4  | 3,36E-05    | 0,000544322 |
| 577 | Xkr4          | ENSMUSG00000051951  | 2,66    | 1,4  | 0,005095353 | 0,032332503 |
| 578 | Tspan6        | ENSMUSG00000067377  | 310,05  | 1,4  | 3,13E-12    | 3,61E-10    |
| 579 | Ptgs2         | ENSMUSG00000032487  | 209,8   | 1,39 | 0,004905405 | 0,031368173 |
| 580 | Lfng          | ENSMUSG00000029570  | 67,37   | 1,39 | 2,82E-08    | 1,23E-06    |
| 581 | Mfng          | ENSMUSG00000018169  | 13,77   | 1,39 | 2,34E-05    | 0,000406003 |
| 582 | Igkv3-5       | ENSMUSG00000095335  | 5,5     | 1,39 | 0,005279159 | 0,033255555 |
| 583 | Gm16046       | ENSMUSG00000085705  | 3,92    | 1,39 | 0,003707345 | 0,025336246 |
| 584 | Gm15657       | ENSMUSG00000090214  | 3,58    | 1,39 | 0,004959693 | 0,031654434 |



|     |               |                     |        |      |             |             |
|-----|---------------|---------------------|--------|------|-------------|-------------|
| 585 | Elovl5        | ENSMUSG00000032349  | 204,08 | 1,39 | 8,67E-14    | 1,39E-11    |
| 586 | Sox7          | ENSMUSG00000063060  | 15,91  | 1,39 | 4,33E-05    | 0,00067594  |
| 587 | Rgs16         | ENSMUSG00000026475  | 13,55  | 1,39 | 0,00090447  | 0,008224703 |
| 588 | Padi4         | ENSMUSG00000025330  | 14,45  | 1,39 | 0,001216053 | 0,010383782 |
| 589 | Dnah8         | ENSMUSG00000033826  | 109,67 | 1,39 | 0,004434818 | 0,029061736 |
| 590 | Trpv3         | ENSMUSG00000043029  | 2,67   | 1,39 | 0,005333761 | 0,033472656 |
| 591 | Slamf1        | ENSMUSG00000015316  | 6,02   | 1,39 | 0,002179364 | 0,01657314  |
| 592 | Tnfrsf11b     | ENSMUSG00000063727  | 87,54  | 1,39 | 3,49E-05    | 0,000561321 |
| 593 | As3mt         | ENSMUSG00000003559  | 153,72 | 1,38 | 3,62E-06    | 8,32E-05    |
| 594 | Gm37651       | ENSMUSG000000103734 | 5,5    | 1,38 | 0,001183631 | 0,010197373 |
| 595 | Al118078      | ENSMUSG00000032313  | 6,42   | 1,38 | 0,001656483 | 0,013246175 |
| 596 | Gm12294       | ENSMUSG00000083935  | 2,19   | 1,38 | 0,005073823 | 0,032258978 |
| 597 | Pramel7       | ENSMUSG00000025839  | 2,22   | 1,38 | 0,005413402 | 0,033826492 |
| 598 | Pus7l         | ENSMUSG00000033356  | 22,19  | 1,38 | 3,14E-05    | 0,00051644  |
| 599 | Cd226         | ENSMUSG00000034028  | 9,78   | 1,38 | 0,002686988 | 0,019478573 |
| 600 | Pcdhb13       | ENSMUSG00000047307  | 10,78  | 1,38 | 0,000348593 | 0,00376591  |
| 601 | Efna4         | ENSMUSG00000028040  | 59,39  | 1,38 | 2,28E-05    | 0,000398634 |
| 602 | Amy2a2        | ENSMUSG00000096569  | 18,18  | 1,38 | 0,000115844 | 0,001529039 |
| 603 | Acot1         | ENSMUSG00000072949  | 39,81  | 1,38 | 1,35E-05    | 0,000259251 |
| 604 | Ighv1-64      | ENSMUSG00000094088  | 17,23  | 1,38 | 0,004092535 | 0,027373756 |
| 605 | Gm13187       | ENSMUSG00000087355  | 12,33  | 1,38 | 0,000149034 | 0,001879682 |
| 606 | Snn           | ENSMUSG00000037972  | 63,74  | 1,38 | 0,000108614 | 0,001455905 |
| 607 | Sv2c          | ENSMUSG00000051111  | 6,51   | 1,38 | 0,005735125 | 0,035333956 |
| 608 | RP23-391P1.1  | ENSMUSG000000106577 | 4,53   | 1,38 | 0,003342692 | 0,023309691 |
| 609 | ligp1         | ENSMUSG00000054072  | 57,05  | 1,38 | 0,003619723 | 0,02485422  |
| 610 | Wfdc1         | ENSMUSG00000023336  | 112,64 | 1,38 | 3,35E-05    | 0,000542506 |
| 611 | Gm13872       | ENSMUSG00000087185  | 3,01   | 1,38 | 0,004677803 | 0,030262019 |
| 612 | Rnf144a       | ENSMUSG00000020642  | 34,92  | 1,38 | 1,27E-05    | 0,000247486 |
| 613 | Sncg          | ENSMUSG00000023064  | 15,9   | 1,38 | 0,00031821  | 0,003481131 |
| 614 | Thbs1         | ENSMUSG00000040152  | 752,7  | 1,38 | 6,11E-07    | 1,82E-05    |
| 615 | Igkv9-120     | ENSMUSG00000094872  | 7,36   | 1,37 | 0,003619622 | 0,02485422  |
| 616 | Lpgat1        | ENSMUSG00000026623  | 467,12 | 1,37 | 1,28E-15    | 3,17E-13    |
| 617 | Smoc2         | ENSMUSG00000023886  | 164,25 | 1,37 | 1,66E-05    | 0,000307178 |
| 618 | Nkain1        | ENSMUSG00000078532  | 30,24  | 1,37 | 2,13E-07    | 7,18E-06    |
| 619 | Abcc2         | ENSMUSG00000025194  | 4,95   | 1,37 | 0,00367488  | 0,02517352  |
| 620 | 4921524J17Rik | ENSMUSG00000036934  | 57,82  | 1,37 | 2,07E-08    | 9,41E-07    |
| 621 | Gpr65         | ENSMUSG00000021886  | 33,66  | 1,37 | 3,94E-06    | 8,95E-05    |
| 622 | Pnpla3        | ENSMUSG00000041653  | 17,6   | 1,37 | 0,001115946 | 0,009737881 |
| 623 | Sox18         | ENSMUSG00000046470  | 22,88  | 1,37 | 2,44E-05    | 0,000419173 |
| 624 | Pcdhb20       | ENSMUSG00000046191  | 14,43  | 1,36 | 0,002113874 | 0,016191526 |
| 625 | Hexb          | ENSMUSG00000021665  | 69,93  | 1,36 | 6,09E-13    | 8,39E-11    |
| 626 | Ighg2b        | ENSMUSG00000076613  | 26,56  | 1,36 | 0,001311653 | 0,011014629 |
| 627 | 6030408B16Rik | ENSMUSG00000075408  | 2,75   | 1,36 | 0,005632063 | 0,034818839 |
| 628 | Itgb8         | ENSMUSG00000025321  | 75,23  | 1,36 | 3,59E-09    | 2,00E-07    |
| 629 | RP23-103P11.1 | ENSMUSG000000104693 | 9,99   | 1,36 | 0,000371704 | 0,003971323 |

|     |               |                     |          |      |             |             |
|-----|---------------|---------------------|----------|------|-------------|-------------|
| 630 | Car10         | ENSMUSG00000056158  | 12,75    | 1,36 | 0,000628654 | 0,006131087 |
| 631 | Rab44         | ENSMUSG00000064147  | 21,44    | 1,36 | 0,001502505 | 0,012275638 |
| 632 | Kcnj12        | ENSMUSG00000042529  | 6,42     | 1,36 | 0,003885512 | 0,026253157 |
| 633 | Fcgbp         | ENSMUSG00000047730  | 25510,38 | 1,36 | 0,006771755 | 0,040196959 |
| 634 | C1qtnf1       | ENSMUSG00000017446  | 38,99    | 1,36 | 4,90E-07    | 1,50E-05    |
| 635 | Rftn1         | ENSMUSG00000039316  | 47,03    | 1,35 | 3,25E-08    | 1,38E-06    |
| 636 | Gm26551       | ENSMUSG00000097219  | 11,63    | 1,35 | 0,000792429 | 0,007399603 |
| 637 | Pcdhgb1       | ENSMUSG000000103037 | 7,63     | 1,35 | 0,001375614 | 0,011418034 |
| 638 | Gm3052        | ENSMUSG000000101462 | 2,72     | 1,35 | 0,006286611 | 0,03793813  |
| 639 | Lrrc15        | ENSMUSG00000052316  | 22,44    | 1,35 | 0,00040905  | 0,004305113 |
| 640 | Mycn          | ENSMUSG00000037169  | 19,87    | 1,34 | 0,000271613 | 0,003060739 |
| 641 | Bpifb4        | ENSMUSG00000074665  | 9        | 1,34 | 0,004331556 | 0,028570095 |
| 642 | Brinp2        | ENSMUSG00000004031  | 3,25     | 1,34 | 0,00661483  | 0,039417948 |
| 643 | Sncaip        | ENSMUSG00000024534  | 27,86    | 1,34 | 2,24E-06    | 5,55E-05    |
| 644 | Tnfrsf8       | ENSMUSG00000028602  | 3,22     | 1,34 | 0,005095551 | 0,032332503 |
| 645 | Ighv1-66      | ENSMUSG00000095519  | 5,23     | 1,34 | 0,007299239 | 0,042537762 |
| 646 | Apold1        | ENSMUSG00000090698  | 33,37    | 1,34 | 0,000390579 | 0,00414238  |
| 647 | Peak1os       | ENSMUSG00000097111  | 1,69     | 1,34 | 0,006890185 | 0,040683737 |
| 648 | Ppp1r16b      | ENSMUSG00000037754  | 37,41    | 1,34 | 3,45E-06    | 8,02E-05    |
| 649 | Dzip1         | ENSMUSG00000042156  | 31,86    | 1,34 | 5,32E-08    | 2,11E-06    |
| 650 | 2010310C07Rik | ENSMUSG000000101268 | 10,75    | 1,34 | 0,000735714 | 0,006979236 |
| 651 | Scml4         | ENSMUSG00000044770  | 410,86   | 1,34 | 7,65E-09    | 3,92E-07    |
| 652 | Ighv1-34      | ENSMUSG00000093955  | 2,25     | 1,34 | 0,007177216 | 0,042005487 |
| 653 | Tacstd2       | ENSMUSG00000051397  | 11,08    | 1,34 | 0,006671057 | 0,039698037 |
| 654 | Vwf           | ENSMUSG00000001930  | 162,48   | 1,34 | 1,72E-06    | 4,43E-05    |
| 655 | Maml2         | ENSMUSG00000031925  | 59,56    | 1,34 | 2,58E-08    | 1,13E-06    |
| 656 | S1pr3         | ENSMUSG00000067586  | 17,55    | 1,33 | 0,000597707 | 0,005898494 |
| 657 | Gm37800       | ENSMUSG000000103308 | 5,58     | 1,33 | 0,005504948 | 0,034205646 |
| 658 | Gpr174        | ENSMUSG00000073008  | 3,86     | 1,33 | 0,007294801 | 0,042533206 |
| 659 | Adarb2        | ENSMUSG00000052551  | 1,59     | 1,33 | 0,006773196 | 0,040196959 |
| 660 | Fjx1          | ENSMUSG00000075012  | 2,25     | 1,33 | 0,007281641 | 0,04248841  |
| 661 | Gm22          | ENSMUSG00000043903  | 2,84     | 1,33 | 0,007135789 | 0,041832958 |
| 662 | Gzmk          | ENSMUSG00000042385  | 1,76     | 1,33 | 0,0034476   | 0,023888269 |
| 663 | Nlrp6         | ENSMUSG00000038745  | 14,11    | 1,33 | 0,000973905 | 0,008733248 |
| 664 | Pcdhb4        | ENSMUSG00000045689  | 14,44    | 1,33 | 0,001240592 | 0,010562966 |
| 665 | Ptprm         | ENSMUSG00000033278  | 71,22    | 1,33 | 5,84E-08    | 2,28E-06    |
| 666 | Igkv1-117     | ENSMUSG00000094335  | 53,47    | 1,33 | 0,008035769 | 0,045921497 |
| 667 | Scgb1b20      | ENSMUSG00000094978  | 25,55    | 1,33 | 0,003831124 | 0,025978133 |
| 668 | Abcg1         | ENSMUSG00000024030  | 90,63    | 1,33 | 3,82E-06    | 8,72E-05    |
| 669 | Sparc         | ENSMUSG00000018593  | 3557,36  | 1,33 | 2,43E-06    | 5,96E-05    |
| 670 | Fli1          | ENSMUSG00000016087  | 79,29    | 1,33 | 3,30E-10    | 2,36E-08    |
| 671 | Prss32        | ENSMUSG00000048992  | 719,02   | 1,33 | 2,83E-05    | 0,000474851 |
| 672 | Adora2b       | ENSMUSG00000018500  | 2,86     | 1,32 | 0,006250441 | 0,037764041 |
| 673 | Rac2          | ENSMUSG00000033220  | 102      | 1,32 | 5,06E-07    | 1,53E-05    |
| 674 | Grik4         | ENSMUSG00000032017  | 12,7     | 1,32 | 0,000192468 | 0,002318189 |

|     |               |                     |        |      |             |             |
|-----|---------------|---------------------|--------|------|-------------|-------------|
| 675 | Il2rg         | ENSMUSG00000031304  | 14,21  | 1,32 | 0,000142568 | 0,001819837 |
| 676 | Hectd2        | ENSMUSG00000041180  | 51,93  | 1,32 | 0,000263771 | 0,002986839 |
| 677 | Pcdhga7       | ENSMUSG000000103472 | 15,12  | 1,32 | 0,000104087 | 0,001403304 |
| 678 | Lax1          | ENSMUSG000000051998 | 7,73   | 1,32 | 0,002327615 | 0,017500357 |
| 679 | Nlrc5         | ENSMUSG000000074151 | 42,62  | 1,32 | 0,000884235 | 0,008088106 |
| 680 | Olfr711       | ENSMUSG000000045013 | 5,91   | 1,32 | 0,002506599 | 0,018511123 |
| 681 | Chit1         | ENSMUSG000000026450 | 104,09 | 1,32 | 0,005725367 | 0,035301881 |
| 682 | Pcdh12        | ENSMUSG000000024440 | 51,67  | 1,32 | 0,000118545 | 0,001557173 |
| 683 | Uts2          | ENSMUSG000000028963 | 64,38  | 1,32 | 0,001922745 | 0,015037346 |
| 684 | Il1r1         | ENSMUSG000000026072 | 372,46 | 1,32 | 3,15E-14    | 5,64E-12    |
| 685 | Pecam1        | ENSMUSG000000020717 | 386,78 | 1,32 | 1,95E-07    | 6,61E-06    |
| 686 | Gm5549        | ENSMUSG000000091721 | 28,11  | 1,32 | 0,000262795 | 0,002981591 |
| 687 | RP24-291E8.4  | ENSMUSG000000105168 | 7,87   | 1,32 | 0,001166266 | 0,010092605 |
| 688 | Fam117b       | ENSMUSG000000041040 | 287,34 | 1,32 | 2,05E-08    | 9,36E-07    |
| 689 | Hoxa1         | ENSMUSG000000029844 | 2,14   | 1,31 | 0,008157455 | 0,046377713 |
| 690 | Glipr1        | ENSMUSG000000056888 | 22,88  | 1,31 | 2,82E-06    | 6,76E-05    |
| 691 | Gm13858       | ENSMUSG000000081196 | 12,47  | 1,31 | 0,00029283  | 0,003266614 |
| 692 | Ednra         | ENSMUSG000000031616 | 154,42 | 1,31 | 5,62E-10    | 3,84E-08    |
| 693 | RP23-307I19.5 | ENSMUSG000000106350 | 13     | 1,31 | 0,008647975 | 0,04839788  |
| 694 | Frmd4a        | ENSMUSG000000026657 | 143,33 | 1,31 | 1,80E-09    | 1,09E-07    |
| 695 | Igkv4-63      | ENSMUSG000000076550 | 1,52   | 1,31 | 0,003980211 | 0,026760908 |
| 696 | Blnk          | ENSMUSG000000061132 | 123,77 | 1,31 | 2,10E-11    | 2,04E-09    |
| 697 | Igkv5-39      | ENSMUSG000000076569 | 22,28  | 1,31 | 0,008311198 | 0,046930739 |
| 698 | Nt5c1a        | ENSMUSG000000054958 | 2,47   | 1,31 | 0,008333909 | 0,047001957 |
| 699 | Ephx3         | ENSMUSG000000037577 | 5      | 1,31 | 0,003554311 | 0,024484554 |
| 700 | Nrg1          | ENSMUSG000000062991 | 106,37 | 1,31 | 3,14E-06    | 7,44E-05    |
| 701 | A430105I19Rik | ENSMUSG000000045838 | 65,88  | 1,3  | 2,29E-07    | 7,67E-06    |
| 702 | Pcdhb19       | ENSMUSG000000043313 | 30,21  | 1,3  | 7,91E-05    | 0,001121316 |
| 703 | Igkv1-88      | ENSMUSG000000076535 | 6,16   | 1,3  | 0,008760186 | 0,048884778 |
| 704 | Gm15783       | ENSMUSG000000083351 | 5,05   | 1,3  | 0,00639921  | 0,038487882 |
| 705 | Fbxl7         | ENSMUSG000000043556 | 12,14  | 1,3  | 0,005025495 | 0,032004178 |
| 706 | Ctla4         | ENSMUSG000000026011 | 5,99   | 1,3  | 0,001974403 | 0,015340351 |
| 707 | Slc28a2       | ENSMUSG000000027219 | 83,75  | 1,3  | 3,06E-07    | 9,80E-06    |
| 708 | Fhl5          | ENSMUSG000000028259 | 24,66  | 1,3  | 0,000100028 | 0,001358257 |
| 709 | Zfp366        | ENSMUSG000000050919 | 9,49   | 1,3  | 0,000731206 | 0,006956167 |
| 710 | Abcc9         | ENSMUSG000000030249 | 340,47 | 1,3  | 7,08E-10    | 4,75E-08    |
| 711 | Pdzrn3        | ENSMUSG000000035357 | 148,02 | 1,3  | 1,95E-06    | 4,95E-05    |
| 712 | Ecel1         | ENSMUSG000000026247 | 25,78  | 1,3  | 0,00030652  | 0,003380431 |
| 713 | Paqr9         | ENSMUSG000000064225 | 1,88   | 1,3  | 0,008325041 | 0,046974707 |
| 714 | Pydc4         | ENSMUSG000000073491 | 17,63  | 1,29 | 2,44E-05    | 0,000419524 |
| 715 | Iglc3         | ENSMUSG000000105547 | 10,64  | 1,29 | 0,007083186 | 0,041617892 |
| 716 | Fads1         | ENSMUSG000000010663 | 459,81 | 1,29 | 4,94E-07    | 1,51E-05    |
| 717 | Fgf2          | ENSMUSG000000037225 | 40,01  | 1,29 | 3,07E-05    | 0,000506998 |
| 718 | Notch3        | ENSMUSG000000038146 | 70,4   | 1,29 | 3,06E-06    | 7,27E-05    |
| 719 | Tcam1         | ENSMUSG000000020712 | 4,62   | 1,29 | 0,004633015 | 0,030039079 |

|     |               |                     |        |      |             |             |
|-----|---------------|---------------------|--------|------|-------------|-------------|
| 720 | St6galnac5    | ENSMUSG00000039037  | 23,98  | 1,29 | 2,96E-05    | 0,000491759 |
| 721 | Adgrf5        | ENSMUSG00000056492  | 254,48 | 1,29 | 1,85E-09    | 1,10E-07    |
| 722 | Sep.04        | ENSMUSG00000020486  | 124,68 | 1,29 | 4,54E-07    | 1,40E-05    |
| 723 | Klra2         | ENSMUSG00000030187  | 12,44  | 1,29 | 0,002347406 | 0,017626379 |
| 724 | Lif           | ENSMUSG00000034394  | 30,27  | 1,29 | 0,004402181 | 0,02892933  |
| 725 | Ephb6         | ENSMUSG00000029869  | 22,02  | 1,29 | 0,000144193 | 0,001835548 |
| 726 | Gypc          | ENSMUSG00000090523  | 37,36  | 1,29 | 1,55E-05    | 0,000289177 |
| 727 | Galntl5       | ENSMUSG00000028938  | 1,92   | 1,29 | 0,008044564 | 0,045960471 |
| 728 | Pea15a        | ENSMUSG00000013698  | 656,31 | 1,29 | 5,89E-09    | 3,10E-07    |
| 729 | Erich2os      | ENSMUSG00000086515  | 5,8    | 1,29 | 0,002510931 | 0,018513954 |
| 730 | Trbc1         | ENSMUSG00000076490  | 5,15   | 1,29 | 0,006519558 | 0,039030129 |
| 731 | Trac          | ENSMUSG00000076928  | 8,41   | 1,29 | 0,001526893 | 0,012410149 |
| 732 | Pcdhb7        | ENSMUSG00000045062  | 24,54  | 1,28 | 0,001287311 | 0,010861396 |
| 733 | Mogat2        | ENSMUSG00000052396  | 118,64 | 1,28 | 6,36E-05    | 0,000939221 |
| 734 | Lypd5         | ENSMUSG00000030484  | 11,32  | 1,28 | 0,000238642 | 0,002744582 |
| 735 | A430078G23Rik | ENSMUSG00000074497  | 11,97  | 1,28 | 0,000434489 | 0,004511403 |
| 736 | Shisa6        | ENSMUSG00000053930  | 11,57  | 1,28 | 0,002166706 | 0,016503849 |
| 737 | Zcchc24       | ENSMUSG00000055538  | 156,97 | 1,28 | 1,51E-08    | 7,24E-07    |
| 738 | Gm30238       | ENSMUSG000000103898 | 6,53   | 1,28 | 0,002218255 | 0,01679206  |
| 739 | Slc7a9        | ENSMUSG00000030492  | 3,52   | 1,28 | 0,008625524 | 0,048307088 |
| 740 | D630023F18Rik | ENSMUSG00000044816  | 12,73  | 1,28 | 0,000285598 | 0,003201283 |
| 741 | Il4ra         | ENSMUSG00000030748  | 483,17 | 1,28 | 3,23E-14    | 5,74E-12    |
| 742 | Tmem154       | ENSMUSG00000056498  | 29,91  | 1,28 | 0,000145421 | 0,001845114 |
| 743 | Medag         | ENSMUSG00000029659  | 48,72  | 1,28 | 0,000387869 | 0,004119451 |
| 744 | Col22a1       | ENSMUSG00000079022  | 11,36  | 1,27 | 0,001540402 | 0,012485249 |
| 745 | Casd1         | ENSMUSG00000015189  | 276,11 | 1,27 | 1,09E-09    | 6,97E-08    |
| 746 | Itga5         | ENSMUSG00000000555  | 114,86 | 1,27 | 2,59E-07    | 8,49E-06    |
| 747 | Bfsp1         | ENSMUSG00000027420  | 24,48  | 1,27 | 8,86E-05    | 0,001227871 |
| 748 | Mylip         | ENSMUSG00000038175  | 95,93  | 1,27 | 2,44E-08    | 1,08E-06    |
| 749 | Slc3a1        | ENSMUSG00000024131  | 13,64  | 1,27 | 0,0045844   | 0,029823591 |
| 750 | Kcnh3         | ENSMUSG00000037579  | 7,2    | 1,27 | 0,007040122 | 0,041442863 |
| 751 | Wdr72         | ENSMUSG00000044976  | 442,85 | 1,27 | 0,000145231 | 0,001843719 |
| 752 | Gm38065       | ENSMUSG000000104485 | 6,88   | 1,27 | 0,004190853 | 0,027871148 |
| 753 | 4933413C19Rik | ENSMUSG00000089952  | 5,48   | 1,27 | 0,006998005 | 0,041247105 |
| 754 | Usp17lb       | ENSMUSG00000062369  | 14,81  | 1,27 | 0,000156318 | 0,001944955 |
| 755 | Pcdhb21       | ENSMUSG00000044022  | 11,93  | 1,27 | 0,002341806 | 0,017595795 |
| 756 | Gm15947       | ENSMUSG00000089697  | 7,06   | 1,27 | 0,002021645 | 0,015618752 |
| 757 | Scgb3a1       | ENSMUSG00000064057  | 12,2   | 1,26 | 0,002036488 | 0,015712561 |
| 758 | Plxdc1        | ENSMUSG00000017417  | 11,69  | 1,26 | 0,000473999 | 0,00486115  |
| 759 | Mmd           | ENSMUSG00000003948  | 100,19 | 1,26 | 9,26E-06    | 0,000188408 |
| 760 | 2310057J18Rik | ENSMUSG00000015519  | 172,99 | 1,26 | 0,005569436 | 0,034514191 |
| 761 | Gm26911       | ENSMUSG00000097834  | 3,39   | 1,26 | 0,007388186 | 0,042937837 |
| 762 | Samd4         | ENSMUSG00000021838  | 71,93  | 1,26 | 8,07E-08    | 3,04E-06    |
| 763 | Fam84a        | ENSMUSG00000020607  | 225,23 | 1,26 | 0,000158958 | 0,001970675 |
| 764 | Scel          | ENSMUSG00000022123  | 9,34   | 1,26 | 0,003136178 | 0,022128215 |

|     |               |                     |         |      |             |             |
|-----|---------------|---------------------|---------|------|-------------|-------------|
| 765 | Irak3         | ENSMUSG00000020227  | 35,81   | 1,26 | 6,73E-06    | 0,000143138 |
| 766 | Pik3cg        | ENSMUSG00000020573  | 184,58  | 1,25 | 3,06E-07    | 9,81E-06    |
| 767 | BC018473      | ENSMUSG00000056032  | 52,69   | 1,25 | 0,000519368 | 0,00525008  |
| 768 | Rac3          | ENSMUSG00000018012  | 29,8    | 1,25 | 4,59E-05    | 0,00070995  |
| 769 | Mycl          | ENSMUSG00000028654  | 75,79   | 1,25 | 1,02E-07    | 3,69E-06    |
| 770 | BE692007      | ENSMUSG00000099757  | 14,08   | 1,25 | 0,000654965 | 0,006339862 |
| 771 | Gjc1          | ENSMUSG00000034520  | 27,84   | 1,25 | 8,13E-05    | 0,001145622 |
| 772 | Qrich2        | ENSMUSG00000070331  | 17,8    | 1,25 | 0,000361105 | 0,003882898 |
| 773 | Prr36         | ENSMUSG00000064125  | 7,56    | 1,25 | 0,002319895 | 0,017453592 |
| 774 | Gpa33         | ENSMUSG00000000544  | 1301,32 | 1,25 | 0,000508454 | 0,005164436 |
| 775 | Mir142hg      | ENSMUSG00000084796  | 7,74    | 1,25 | 0,005317633 | 0,033413274 |
| 776 | Ttyh3         | ENSMUSG00000036565  | 70,35   | 1,25 | 2,18E-05    | 0,000385076 |
| 777 | Pde7b         | ENSMUSG00000019990  | 58,25   | 1,25 | 3,57E-07    | 1,13E-05    |
| 778 | Abca4         | ENSMUSG00000028125  | 23,5    | 1,25 | 7,89E-05    | 0,001118793 |
| 779 | Adam22        | ENSMUSG00000040537  | 132,82  | 1,25 | 1,92E-05    | 0,000346522 |
| 780 | Fstl1         | ENSMUSG00000022816  | 983,21  | 1,25 | 4,03E-08    | 1,66E-06    |
| 781 | Sh3bp4        | ENSMUSG00000036206  | 149,88  | 1,24 | 6,83E-10    | 4,61E-08    |
| 782 | Tnfsf4        | ENSMUSG00000026700  | 4,56    | 1,24 | 0,005581504 | 0,034561364 |
| 783 | 4930578C19Rik | ENSMUSG00000037358  | 12,1    | 1,24 | 0,000411488 | 0,004324903 |
| 784 | Gimap5        | ENSMUSG00000043505  | 10,89   | 1,24 | 0,000616238 | 0,006045474 |
| 785 | Lrrc8c        | ENSMUSG00000054720  | 87,78   | 1,24 | 3,66E-08    | 1,53E-06    |
| 786 | Nefh          | ENSMUSG00000020396  | 10,01   | 1,24 | 0,000966212 | 0,008670945 |
| 787 | Al662270      | ENSMUSG00000087107  | 24,42   | 1,24 | 0,000257095 | 0,002922615 |
| 788 | Olfr558       | ENSMUSG00000070423  | 11,66   | 1,23 | 0,001220119 | 0,010407689 |
| 789 | Mmp9          | ENSMUSG00000017737  | 49,63   | 1,23 | 0,000496214 | 0,005055558 |
| 790 | Prrx1         | ENSMUSG00000026586  | 38,32   | 1,23 | 1,83E-06    | 4,66E-05    |
| 791 | Myct1         | ENSMUSG00000046916  | 30,23   | 1,23 | 1,32E-05    | 0,000254389 |
| 792 | Pmepa1        | ENSMUSG00000038400  | 503,42  | 1,23 | 2,46E-06    | 6,01E-05    |
| 793 | Atoh1         | ENSMUSG00000073043  | 3,09    | 1,23 | 0,008991401 | 0,04985225  |
| 794 | Epha7         | ENSMUSG00000028289  | 109,36  | 1,23 | 7,32E-12    | 7,67E-10    |
| 795 | RP23-2C16.2   | ENSMUSG000000107134 | 73,34   | 1,23 | 2,31E-05    | 0,000402176 |
| 796 | Barx2         | ENSMUSG00000032033  | 27,51   | 1,23 | 0,00106786  | 0,009394749 |
| 797 | Slc13a1       | ENSMUSG00000029700  | 28,44   | 1,23 | 0,008131728 | 0,046276673 |
| 798 | Scara3        | ENSMUSG00000034463  | 181,44  | 1,23 | 0,000115253 | 0,001524697 |
| 799 | Arhgap44      | ENSMUSG00000033389  | 93,33   | 1,23 | 9,89E-11    | 8,25E-09    |
| 800 | Gm14444       | ENSMUSG00000078906  | 2,26    | 1,23 | 0,008701123 | 0,04863683  |
| 801 | Chsy3         | ENSMUSG00000058152  | 76,04   | 1,23 | 1,37E-06    | 3,62E-05    |
| 802 | Dock11        | ENSMUSG00000031093  | 330,41  | 1,22 | 3,53E-08    | 1,49E-06    |
| 803 | Nkx2-3        | ENSMUSG00000044220  | 18,5    | 1,22 | 0,001473213 | 0,012071013 |
| 804 | Angpt1        | ENSMUSG00000022309  | 30,19   | 1,22 | 9,82E-05    | 0,001338134 |
| 805 | Vash1         | ENSMUSG00000021256  | 14,2    | 1,22 | 0,001876583 | 0,014722885 |
| 806 | Inpp4b        | ENSMUSG00000037940  | 98,44   | 1,22 | 2,22E-11    | 2,12E-09    |
| 807 | Pdgfrb        | ENSMUSG00000024620  | 202,38  | 1,22 | 3,53E-09    | 1,99E-07    |
| 808 | Sfrp2         | ENSMUSG00000027996  | 15,51   | 1,22 | 0,003944455 | 0,026589651 |
| 809 | Cxcl1         | ENSMUSG00000029380  | 89      | 1,22 | 0,008908947 | 0,049524891 |

|     |          |                    |         |      |             |             |
|-----|----------|--------------------|---------|------|-------------|-------------|
| 810 | Esr1     | ENSMUSG00000019768 | 31,79   | 1,22 | 1,17E-06    | 3,13E-05    |
| 811 | Pex5l    | ENSMUSG00000027674 | 81,8    | 1,22 | 0,000427809 | 0,004456185 |
| 812 | Bgn      | ENSMUSG00000031375 | 1036,11 | 1,22 | 8,69E-09    | 4,42E-07    |
| 813 | Ptpro    | ENSMUSG00000030223 | 246,67  | 1,22 | 3,96E-06    | 8,99E-05    |
| 814 | Spn      | ENSMUSG00000051457 | 22,06   | 1,22 | 0,004033955 | 0,027051913 |
| 815 | Snx20    | ENSMUSG00000031662 | 17,13   | 1,21 | 0,000621966 | 0,006073501 |
| 816 | Bdh2     | ENSMUSG00000028167 | 85,62   | 1,21 | 0,000998305 | 0,008921101 |
| 817 | Gimap9   | ENSMUSG00000051124 | 22,59   | 1,21 | 5,35E-05    | 0,000807993 |
| 818 | Lamb1    | ENSMUSG00000002900 | 814,14  | 1,21 | 3,57E-12    | 4,00E-10    |
| 819 | Ccdc109b | ENSMUSG00000027994 | 27,96   | 1,21 | 7,88E-05    | 0,001118793 |
| 820 | Gpihbp1  | ENSMUSG00000022579 | 39,64   | 1,21 | 0,002481623 | 0,018379178 |
| 821 | Htr1b    | ENSMUSG00000049511 | 42,22   | 1,21 | 1,81E-06    | 4,63E-05    |
| 822 | Eif4e3   | ENSMUSG00000093661 | 47,81   | 1,21 | 5,08E-06    | 0,000111793 |
| 823 | Gucy2c   | ENSMUSG00000042638 | 146,21  | 1,21 | 5,04E-05    | 0,000769033 |
| 824 | Acsm4    | ENSMUSG00000047026 | 5,99    | 1,21 | 0,004738791 | 0,030563099 |
| 825 | Slc39a8  | ENSMUSG00000053897 | 128,81  | 1,21 | 1,34E-06    | 3,54E-05    |
| 826 | Ash2l    | ENSMUSG00000031575 | 356,92  | 1,21 | 1,16E-12    | 1,49E-10    |
| 827 | Hsd11b2  | ENSMUSG00000031891 | 68,14   | 1,2  | 9,26E-05    | 0,001271373 |
| 828 | Cadm1    | ENSMUSG00000032076 | 459,8   | 1,2  | 1,03E-08    | 5,09E-07    |
| 829 | Palmd    | ENSMUSG00000033377 | 34,39   | 1,2  | 0,000855567 | 0,007872295 |
| 830 | Slc15a3  | ENSMUSG00000024737 | 37,11   | 1,2  | 0,000104382 | 0,001405648 |
| 831 | Ets1     | ENSMUSG00000032035 | 211,18  | 1,2  | 2,27E-13    | 3,33E-11    |
| 832 | Cdc14a   | ENSMUSG00000033502 | 395,81  | 1,2  | 2,12E-08    | 9,62E-07    |
| 833 | Ifi47    | ENSMUSG00000078920 | 65,51   | 1,2  | 0,002070224 | 0,015925328 |
| 834 | Reep6    | ENSMUSG00000035504 | 47,86   | 1,2  | 9,44E-05    | 0,001291616 |
| 835 | Gm26813  | ENSMUSG00000097819 | 54,62   | 1,2  | 0,000198989 | 0,002380707 |
| 836 | Napepld  | ENSMUSG00000044968 | 219,57  | 1,2  | 3,59E-06    | 8,26E-05    |
| 837 | Clca2    | ENSMUSG00000036960 | 38,12   | 1,2  | 0,000171234 | 0,002103815 |
| 838 | Wwtr1    | ENSMUSG00000027803 | 211,66  | 1,19 | 5,01E-09    | 2,70E-07    |
| 839 | Ighv1-55 | ENSMUSG00000095589 | 13,09   | 1,19 | 0,008967609 | 0,049767771 |
| 840 | Nod2     | ENSMUSG00000055994 | 33,38   | 1,19 | 3,03E-05    | 0,000500332 |
| 841 | Cald1    | ENSMUSG00000029761 | 1199,02 | 1,19 | 3,08E-06    | 7,31E-05    |
| 842 | Sla2     | ENSMUSG00000027636 | 22,39   | 1,19 | 6,90E-05    | 0,001006219 |
| 843 | Asgr2    | ENSMUSG00000040963 | 3,84    | 1,19 | 0,008098462 | 0,046177703 |
| 844 | Msn      | ENSMUSG00000031207 | 524,62  | 1,19 | 1,92E-08    | 8,84E-07    |
| 845 | Cdr2l    | ENSMUSG00000050910 | 98,49   | 1,19 | 3,47E-08    | 1,47E-06    |
| 846 | Bpifb5   | ENSMUSG00000038572 | 17,42   | 1,19 | 0,005272825 | 0,033242657 |
| 847 | Hs2st1   | ENSMUSG00000040151 | 320,76  | 1,19 | 5,92E-13    | 8,19E-11    |
| 848 | P3h1     | ENSMUSG00000028641 | 37,14   | 1,19 | 1,61E-05    | 0,000297932 |
| 849 | Fstl4    | ENSMUSG00000036264 | 123,09  | 1,19 | 0,000908191 | 0,00825083  |
| 850 | Slc25a45 | ENSMUSG00000024818 | 95,23   | 1,19 | 3,14E-09    | 1,80E-07    |
| 851 | Sema6d   | ENSMUSG00000027200 | 108,42  | 1,19 | 3,24E-15    | 7,18E-13    |
| 852 | Pglyrp1  | ENSMUSG00000030413 | 641,94  | 1,19 | 0,000508    | 0,005162081 |
| 853 | Cd9      | ENSMUSG00000030342 | 1819,85 | 1,19 | 4,17E-05    | 0,000654185 |
| 854 | Sema3g   | ENSMUSG00000021904 | 40,72   | 1,19 | 2,56E-06    | 6,24E-05    |

|     |               |                     |         |      |             |             |
|-----|---------------|---------------------|---------|------|-------------|-------------|
| 855 | Pvrl3         | ENSMUSG00000022656  | 684,81  | 1,19 | 5,27E-14    | 8,82E-12    |
| 856 | Jdp2          | ENSMUSG00000034271  | 39,68   | 1,19 | 1,78E-05    | 0,000324138 |
| 857 | Plscr1        | ENSMUSG00000032369  | 415,38  | 1,19 | 1,02E-10    | 8,45E-09    |
| 858 | Vwa1          | ENSMUSG00000042116  | 57,24   | 1,19 | 0,000772492 | 0,007239584 |
| 859 | Ncald         | ENSMUSG00000051359  | 238,36  | 1,18 | 3,23E-05    | 0,000526045 |
| 860 | 4930435H24Rik | ENSMUSG00000029092  | 41,95   | 1,18 | 0,000138362 | 0,00177981  |
| 861 | Tnfaipl2      | ENSMUSG00000013707  | 26,18   | 1,18 | 2,51E-05    | 0,000428117 |
| 862 | Il18rap       | ENSMUSG00000026068  | 70,92   | 1,18 | 3,27E-06    | 7,70E-05    |
| 863 | Pcdh20        | ENSMUSG00000050505  | 35,45   | 1,18 | 0,000115775 | 0,001528996 |
| 864 | Tgfbr2        | ENSMUSG00000032440  | 824,07  | 1,18 | 6,61E-17    | 2,05E-14    |
| 865 | Gm14321       | ENSMUSG00000084797  | 4,24    | 1,18 | 0,008021104 | 0,045848952 |
| 866 | Zfp92         | ENSMUSG00000031374  | 5,67    | 1,18 | 0,00632167  | 0,038102327 |
| 867 | Tspan12       | ENSMUSG00000029669  | 708,13  | 1,18 | 6,02E-07    | 1,80E-05    |
| 868 | Mmrn2         | ENSMUSG00000041445  | 119,84  | 1,18 | 7,62E-08    | 2,88E-06    |
| 869 | Slc6a16       | ENSMUSG00000094152  | 5,69    | 1,18 | 0,007348011 | 0,042747052 |
| 870 | Cldn15        | ENSMUSG00000001739  | 52,02   | 1,17 | 0,006149368 | 0,037322848 |
| 871 | Tcaf3         | ENSMUSG00000018656  | 30,74   | 1,17 | 0,000273689 | 0,003082646 |
| 872 | Zap70         | ENSMUSG00000026117  | 6,64    | 1,17 | 0,005377624 | 0,033666212 |
| 873 | Milr1         | ENSMUSG00000040528  | 37,78   | 1,17 | 6,61E-07    | 1,95E-05    |
| 874 | C230035I16Rik | ENSMUSG00000085024  | 5,64    | 1,17 | 0,005446129 | 0,033958046 |
| 875 | Igkv4-61      | ENSMUSG00000076552  | 15,06   | 1,17 | 0,003215221 | 0,022610517 |
| 876 | Amica1        | ENSMUSG00000048534  | 83,83   | 1,17 | 2,97E-07    | 9,55E-06    |
| 877 | Grm7          | ENSMUSG00000056755  | 6,06    | 1,17 | 0,006481824 | 0,038864221 |
| 878 | Pcdh17        | ENSMUSG00000035566  | 29,16   | 1,17 | 0,000745725 | 0,007039769 |
| 879 | Prom1         | ENSMUSG00000029086  | 4091,54 | 1,17 | 7,03E-17    | 2,15E-14    |
| 880 | Ly6d          | ENSMUSG00000034634  | 3694,69 | 1,17 | 2,73E-05    | 0,000461198 |
| 881 | Prr16         | ENSMUSG00000073565  | 10,82   | 1,17 | 0,001283716 | 0,010838922 |
| 882 | Samd12        | ENSMUSG00000058656  | 27,7    | 1,17 | 0,000506457 | 0,005148643 |
| 883 | Sh2d5         | ENSMUSG00000045349  | 29,08   | 1,17 | 0,00031288  | 0,003437547 |
| 884 | Mrc2          | ENSMUSG00000020695  | 105,57  | 1,17 | 2,62E-07    | 8,54E-06    |
| 885 | Mall          | ENSMUSG00000027377  | 241,35  | 1,17 | 0,008275589 | 0,046787616 |
| 886 | Tmem117       | ENSMUSG00000063296  | 77,36   | 1,17 | 7,79E-06    | 0,000162464 |
| 887 | Rcc2          | ENSMUSG00000040945  | 493,83  | 1,16 | 9,46E-06    | 0,00019175  |
| 888 | Tmem119       | ENSMUSG00000054675  | 142,45  | 1,16 | 7,06E-06    | 0,000149152 |
| 889 | Cxcr6         | ENSMUSG00000048521  | 48      | 1,16 | 0,000432424 | 0,004496205 |
| 890 | Kirrel        | ENSMUSG00000041734  | 111,15  | 1,16 | 1,75E-07    | 6,03E-06    |
| 891 | Adamts7       | ENSMUSG00000032363  | 26,06   | 1,16 | 0,000101308 | 0,001369016 |
| 892 | Hivep3        | ENSMUSG00000028634  | 190,77  | 1,16 | 0,00054039  | 0,005422541 |
| 893 | Epcam         | ENSMUSG00000045394  | 3272,17 | 1,16 | 3,04E-14    | 5,49E-12    |
| 894 | RP24-140D11.1 | ENSMUSG000000106396 | 12,17   | 1,16 | 0,001797732 | 0,014195189 |
| 895 | Kif26b        | ENSMUSG00000026494  | 48,27   | 1,16 | 0,000134553 | 0,001736572 |
| 896 | Fmnl3         | ENSMUSG00000023008  | 76,12   | 1,15 | 1,67E-08    | 7,82E-07    |
| 897 | F3            | ENSMUSG00000028128  | 245,1   | 1,15 | 0,001569275 | 0,012679525 |
| 898 | AI504432      | ENSMUSG00000056145  | 34,14   | 1,15 | 0,002224781 | 0,016830511 |
| 899 | Ccl12         | ENSMUSG00000035352  | 18,98   | 1,15 | 0,00152476  | 0,012410149 |

|     |               |                     |        |      |             |             |
|-----|---------------|---------------------|--------|------|-------------|-------------|
| 900 | Ptprb         | ENSMUSG00000020154  | 321,32 | 1,15 | 6,13E-09    | 3,21E-07    |
| 901 | Alpl          | ENSMUSG00000028766  | 67,42  | 1,15 | 9,69E-05    | 0,001323412 |
| 902 | Has2          | ENSMUSG00000022367  | 20,67  | 1,15 | 0,001195839 | 0,01026454  |
| 903 | Gm20689       | ENSMUSG00000093384  | 13,48  | 1,15 | 0,001557069 | 0,012607164 |
| 904 | Gpd1          | ENSMUSG00000023019  | 563,28 | 1,15 | 4,66E-09    | 2,53E-07    |
| 905 | Mettl11b      | ENSMUSG00000040113  | 11,35  | 1,15 | 0,002210055 | 0,016751782 |
| 906 | Trim31        | ENSMUSG00000058063  | 53,59  | 1,14 | 0,005474401 | 0,034070423 |
| 907 | Mfap4         | ENSMUSG00000042436  | 174,04 | 1,14 | 0,000302649 | 0,003350449 |
| 908 | B430306N03Rik | ENSMUSG00000043740  | 11     | 1,14 | 0,007659541 | 0,044238647 |
| 909 | Zfp532        | ENSMUSG00000042439  | 97,32  | 1,14 | 5,84E-07    | 1,75E-05    |
| 910 | Aqp8          | ENSMUSG00000030762  | 62,22  | 1,14 | 2,27E-06    | 5,61E-05    |
| 911 | Sema4g        | ENSMUSG00000025207  | 145,45 | 1,14 | 1,24E-07    | 4,42E-06    |
| 912 | Tmem196       | ENSMUSG00000048004  | 9,38   | 1,14 | 0,007896683 | 0,045271203 |
| 913 | Pcdhga9       | ENSMUSG000000102440 | 12,76  | 1,14 | 0,00146683  | 0,012027179 |
| 914 | Klhl4         | ENSMUSG00000025597  | 14,72  | 1,14 | 0,002261225 | 0,017078451 |
| 915 | Mdga1         | ENSMUSG00000043557  | 72,47  | 1,14 | 0,000200067 | 0,002391148 |
| 916 | Tmem132a      | ENSMUSG00000024736  | 18,79  | 1,14 | 0,004816106 | 0,030950233 |
| 917 | Cd180         | ENSMUSG00000021624  | 15,59  | 1,13 | 0,00595788  | 0,036363923 |
| 918 | Cldf1         | ENSMUSG00000040663  | 11,9   | 1,13 | 0,001487762 | 0,012177359 |
| 919 | Mcam          | ENSMUSG00000032135  | 336,89 | 1,13 | 1,60E-06    | 4,15E-05    |
| 920 | Arid5a        | ENSMUSG00000037447  | 49,76  | 1,13 | 8,88E-05    | 0,001229744 |
| 921 | Erg           | ENSMUSG00000040732  | 51,05  | 1,13 | 0,000285209 | 0,003198466 |
| 922 | Penk          | ENSMUSG00000045573  | 55,76  | 1,13 | 0,004478178 | 0,029255249 |
| 923 | Ugt8a         | ENSMUSG00000032854  | 221,39 | 1,13 | 1,26E-05    | 0,000244782 |
| 924 | Atp6v0e2      | ENSMUSG00000039347  | 55,63  | 1,13 | 4,58E-05    | 0,000708888 |
| 925 | Pik3cd        | ENSMUSG00000039936  | 61,02  | 1,13 | 8,92E-05    | 0,001232919 |
| 926 | Rgs4          | ENSMUSG00000038530  | 69,54  | 1,13 | 0,000121021 | 0,001584782 |
| 927 | Nudt4         | ENSMUSG00000020029  | 410,07 | 1,12 | 1,73E-08    | 8,01E-07    |
| 928 | Phf11d        | ENSMUSG00000068245  | 24,12  | 1,12 | 5,26E-05    | 0,000798838 |
| 929 | Bmx           | ENSMUSG00000031377  | 36,77  | 1,12 | 0,005326783 | 0,033446911 |
| 930 | Gm24455       | ENSMUSG00000065282  | 12,49  | 1,12 | 0,003094648 | 0,021894937 |
| 931 | Specc1        | ENSMUSG00000042331  | 148,14 | 1,12 | 7,25E-09    | 3,73E-07    |
| 932 | Filip1        | ENSMUSG00000034898  | 69,67  | 1,12 | 4,41E-06    | 9,89E-05    |
| 933 | Clic5         | ENSMUSG00000023959  | 317,59 | 1,12 | 4,16E-07    | 1,30E-05    |
| 934 | Nos3          | ENSMUSG00000028978  | 19,59  | 1,12 | 0,000367058 | 0,003928908 |
| 935 | Aard          | ENSMUSG00000068522  | 16,81  | 1,12 | 0,000699826 | 0,006701628 |
| 936 | Pcdhgb5       | ENSMUSG000000103749 | 20,49  | 1,12 | 0,000188691 | 0,002278587 |
| 937 | Adora2a       | ENSMUSG00000020178  | 5,84   | 1,12 | 0,006222884 | 0,0376512   |
| 938 | Lrguk         | ENSMUSG00000056215  | 13,39  | 1,12 | 0,001115061 | 0,009736388 |
| 939 | Egflam        | ENSMUSG00000042961  | 20,98  | 1,12 | 0,001365045 | 0,011356667 |
| 940 | Gm5431        | ENSMUSG00000058163  | 9,45   | 1,12 | 0,008119673 | 0,046241994 |
| 941 | Gm29808       | ENSMUSG000000103419 | 13,1   | 1,12 | 0,000877086 | 0,008041684 |
| 942 | Gm12010       | ENSMUSG00000083292  | 7,59   | 1,12 | 0,00446741  | 0,029215383 |
| 943 | Gm826         | ENSMUSG00000074623  | 8,51   | 1,12 | 0,002214761 | 0,016771065 |
| 944 | Gbp5          | ENSMUSG000000105504 | 22,42  | 1,12 | 0,002285524 | 0,017250778 |



|     |          |                     |        |      |             |             |
|-----|----------|---------------------|--------|------|-------------|-------------|
| 945 | Mgat5    | ENSMUSG00000036155  | 494,28 | 1,12 | 7,47E-06    | 0,000156376 |
| 946 | Scara5   | ENSMUSG00000022032  | 79,48  | 1,12 | 0,00103867  | 0,009190054 |
| 947 | Epha4    | ENSMUSG00000026235  | 245,87 | 1,12 | 2,15E-16    | 5,90E-14    |
| 948 | Spry4    | ENSMUSG00000024427  | 48,25  | 1,11 | 0,000417087 | 0,004368426 |
| 949 | Dennd5b  | ENSMUSG00000030313  | 95,7   | 1,11 | 2,04E-11    | 1,99E-09    |
| 950 | Tnfrsf23 | ENSMUSG00000037613  | 87,53  | 1,11 | 4,85E-05    | 0,000744507 |
| 951 | Ablim3   | ENSMUSG00000032735  | 10,91  | 1,11 | 0,004125468 | 0,027522835 |
| 952 | Gm11375  | ENSMUSG00000085981  | 6,19   | 1,11 | 0,007400755 | 0,042978681 |
| 953 | Thbs2    | ENSMUSG00000023885  | 57,7   | 1,11 | 0,000774071 | 0,00725146  |
| 954 | Plin2    | ENSMUSG00000028494  | 254,18 | 1,11 | 6,78E-08    | 2,60E-06    |
| 955 | Fkbp10   | ENSMUSG00000001555  | 81,31  | 1,11 | 1,44E-05    | 0,000273844 |
| 956 | Pld1     | ENSMUSG00000027695  | 592,53 | 1,11 | 6,23E-10    | 4,22E-08    |
| 957 | Rapgef5  | ENSMUSG00000041992  | 74,54  | 1,11 | 1,13E-05    | 0,00022212  |
| 958 | Fbln5    | ENSMUSG00000021186  | 179,79 | 1,11 | 1,86E-05    | 0,000336212 |
| 959 | Emilin1  | ENSMUSG00000029163  | 324,04 | 1,11 | 7,53E-05    | 0,001082026 |
| 960 | Gm23734  | ENSMUSG00000065687  | 14,87  | 1,11 | 0,008341499 | 0,047010163 |
| 961 | Sema4c   | ENSMUSG00000026121  | 109,87 | 1,11 | 1,59E-05    | 0,000295216 |
| 962 | Gm37364  | ENSMUSG000000104012 | 17,66  | 1,11 | 0,008235137 | 0,046648405 |
| 963 | Slc7a7   | ENSMUSG00000000958  | 103,38 | 1,1  | 1,37E-06    | 3,62E-05    |
| 964 | Bambi    | ENSMUSG00000024232  | 23,25  | 1,1  | 0,000918404 | 0,008329333 |
| 965 | Ace      | ENSMUSG00000020681  | 181,99 | 1,1  | 9,79E-07    | 2,72E-05    |
| 966 | Raet1d   | ENSMUSG00000078452  | 25,32  | 1,1  | 0,003351052 | 0,023353992 |
| 967 | Clec2h   | ENSMUSG00000030364  | 36,43  | 1,1  | 9,22E-05    | 0,001267003 |
| 968 | Grasp    | ENSMUSG00000000531  | 18,88  | 1,1  | 0,002550654 | 0,018713919 |
| 969 | Bean1    | ENSMUSG00000031872  | 14,1   | 1,1  | 0,002585497 | 0,018913711 |
| 970 | Tgm5     | ENSMUSG00000053675  | 49,35  | 1,1  | 0,00017217  | 0,002113076 |
| 971 | Sh3rf1   | ENSMUSG00000031642  | 430,04 | 1,1  | 9,39E-08    | 3,44E-06    |
| 972 | Gm5862   | ENSMUSG00000067700  | 13,27  | 1,1  | 0,00204776  | 0,01578906  |
| 973 | Ifi202b  | ENSMUSG00000026535  | 55,37  | 1,1  | 7,43E-06    | 0,00015582  |
| 974 | Gng2     | ENSMUSG00000043004  | 101,39 | 1,1  | 1,35E-08    | 6,57E-07    |
| 975 | Gm29151  | ENSMUSG000000106005 | 10,83  | 1,1  | 0,005642922 | 0,034858187 |
| 976 | Vcam1    | ENSMUSG00000027962  | 214,32 | 1,1  | 2,00E-06    | 5,03E-05    |
| 977 | Orc2     | ENSMUSG00000026037  | 241,41 | 1,09 | 3,51E-10    | 2,50E-08    |
| 978 | Cnn2     | ENSMUSG00000004665  | 229,59 | 1,09 | 9,73E-09    | 4,86E-07    |
| 979 | Ifnar2   | ENSMUSG00000022971  | 64,63  | 1,09 | 3,86E-09    | 2,13E-07    |
| 980 | Tek      | ENSMUSG00000006386  | 140,92 | 1,09 | 3,63E-06    | 8,34E-05    |
| 981 | Timp3    | ENSMUSG00000020044  | 288,41 | 1,09 | 0,000123935 | 0,001613364 |
| 982 | Gm6104   | ENSMUSG00000062588  | 14,44  | 1,09 | 0,004115631 | 0,027480841 |
| 983 | Arsi     | ENSMUSG00000036412  | 16,91  | 1,09 | 0,007892127 | 0,045256231 |
| 984 | Kcnj10   | ENSMUSG00000044708  | 31,34  | 1,09 | 0,002527346 | 0,018591069 |
| 985 | Gm38070  | ENSMUSG000000103560 | 7,05   | 1,09 | 0,007667288 | 0,044261421 |
| 986 | Pear1    | ENSMUSG00000028073  | 120,01 | 1,09 | 4,61E-08    | 1,87E-06    |
| 987 | Cmya5    | ENSMUSG00000047419  | 14,11  | 1,09 | 0,002431955 | 0,018109309 |
| 988 | Dll4     | ENSMUSG00000027314  | 83,73  | 1,09 | 0,000234917 | 0,00271831  |
| 989 | Kif21b   | ENSMUSG00000041642  | 200,43 | 1,09 | 5,78E-05    | 0,000863759 |

|      |          |                     |         |      |             |             |
|------|----------|---------------------|---------|------|-------------|-------------|
| 990  | Ehd3     | ENSMUSG00000024065  | 35,45   | 1,09 | 0,000284376 | 0,003192204 |
| 991  | Arl11    | ENSMUSG00000043157  | 11,32   | 1,09 | 0,002772329 | 0,01997897  |
| 992  | BC034090 | ENSMUSG00000033722  | 30,86   | 1,09 | 0,000185289 | 0,002242164 |
| 993  | Spon1    | ENSMUSG00000038156  | 226,42  | 1,09 | 3,47E-06    | 8,05E-05    |
| 994  | Aspa     | ENSMUSG00000020774  | 202,66  | 1,09 | 3,32E-05    | 0,000538466 |
| 995  | Pcdhgb2  | ENSMUSG000000102748 | 18,08   | 1,08 | 0,002412939 | 0,017990735 |
| 996  | Stra6l   | ENSMUSG00000028327  | 352,29  | 1,08 | 2,10E-10    | 1,61E-08    |
| 997  | Ppp1r42  | ENSMUSG00000025916  | 15,41   | 1,08 | 0,000510771 | 0,005183442 |
| 998  | Dll1     | ENSMUSG00000014773  | 26,41   | 1,08 | 0,000965819 | 0,008670945 |
| 999  | Endod1   | ENSMUSG00000037419  | 363,84  | 1,08 | 0,000985309 | 0,008818516 |
| 1000 | Sema5a   | ENSMUSG00000022231  | 135,16  | 1,08 | 8,57E-08    | 3,21E-06    |
| 1001 | Gja5     | ENSMUSG00000057123  | 69,2    | 1,08 | 1,45E-08    | 6,99E-07    |
| 1002 | Cd86     | ENSMUSG00000022901  | 35,9    | 1,08 | 5,60E-05    | 0,000841384 |
| 1003 | Ehf      | ENSMUSG00000012350  | 1947,15 | 1,08 | 4,36E-11    | 3,96E-09    |
| 1004 | Tcf7     | ENSMUSG00000000782  | 30,11   | 1,08 | 6,01E-05    | 0,000895046 |
| 1005 | Tusc5    | ENSMUSG00000046275  | 28,76   | 1,08 | 0,0010416   | 0,009210978 |
| 1006 | Elfn1    | ENSMUSG00000048988  | 48,42   | 1,08 | 0,000209799 | 0,00248702  |
| 1007 | Ighg2c   | ENSMUSG00000076612  | 14,24   | 1,08 | 0,008252026 | 0,046687249 |
| 1008 | Meox1    | ENSMUSG00000001493  | 25,69   | 1,08 | 0,004403707 | 0,028931188 |
| 1009 | Abcb5    | ENSMUSG00000072791  | 25,45   | 1,08 | 0,000328672 | 0,003573924 |
| 1010 | Ada      | ENSMUSG00000017697  | 23,34   | 1,08 | 0,000287718 | 0,003220398 |
| 1011 | Gm10451  | ENSMUSG00000073000  | 72,92   | 1,08 | 2,02E-07    | 6,81E-06    |
| 1012 | Lcp2     | ENSMUSG00000002699  | 59,69   | 1,08 | 2,17E-05    | 0,000384647 |
| 1013 | Akap6    | ENSMUSG00000061603  | 54,41   | 1,07 | 2,46E-05    | 0,000421312 |
| 1014 | Trpc4    | ENSMUSG00000027748  | 22,9    | 1,07 | 0,000315302 | 0,003456    |
| 1015 | Chst11   | ENSMUSG00000034612  | 98,12   | 1,07 | 6,99E-05    | 0,001017047 |
| 1016 | Gatm     | ENSMUSG00000027199  | 110,22  | 1,07 | 0,000747606 | 0,007048947 |
| 1017 | Pde10a   | ENSMUSG00000023868  | 31,8    | 1,07 | 0,000163598 | 0,002020664 |
| 1018 | Nr2f1    | ENSMUSG00000069171  | 14,27   | 1,07 | 0,001433545 | 0,011820905 |
| 1019 | Cx3cr1   | ENSMUSG00000052336  | 231,14  | 1,07 | 0,000287947 | 0,003221233 |
| 1020 | Etv4     | ENSMUSG00000017724  | 63,99   | 1,06 | 2,27E-05    | 0,000397905 |
| 1021 | Zfp41    | ENSMUSG00000047003  | 40,54   | 1,06 | 0,000179665 | 0,002184331 |
| 1022 | Hhipl1   | ENSMUSG00000021260  | 11,67   | 1,06 | 0,003713101 | 0,025368132 |
| 1023 | Cd99l2   | ENSMUSG00000035776  | 157,02  | 1,06 | 3,11E-08    | 1,33E-06    |
| 1024 | Ccdc88b  | ENSMUSG00000047810  | 22,22   | 1,06 | 0,004359012 | 0,028702381 |
| 1025 | Atp10a   | ENSMUSG00000025324  | 90,08   | 1,06 | 7,94E-05    | 0,001123235 |
| 1026 | Hmgcs2   | ENSMUSG00000027875  | 370,42  | 1,06 | 0,00139512  | 0,011544965 |
| 1027 | Klhl6    | ENSMUSG00000043008  | 26,74   | 1,06 | 0,000376934 | 0,004019823 |
| 1028 | Gja4     | ENSMUSG00000050234  | 27,3    | 1,06 | 0,00072553  | 0,006916463 |
| 1029 | Afap1l2  | ENSMUSG00000025083  | 46,1    | 1,06 | 2,31E-05    | 0,000402678 |
| 1030 | Hcls1    | ENSMUSG00000022831  | 64,03   | 1,06 | 0,000214062 | 0,002524691 |
| 1031 | Urah     | ENSMUSG00000025481  | 182,7   | 1,06 | 0,002353715 | 0,017650966 |
| 1032 | Card10   | ENSMUSG00000033170  | 67,38   | 1,06 | 0,008057378 | 0,0459998   |
| 1033 | Rtn4rl2  | ENSMUSG00000050896  | 13,91   | 1,06 | 0,00421985  | 0,027989273 |
| 1034 | Bin2     | ENSMUSG00000098112  | 16,02   | 1,06 | 0,00530162  | 0,033351902 |

|      |               |                     |         |      |             |             |
|------|---------------|---------------------|---------|------|-------------|-------------|
| 1035 | Rdh10         | ENSMUSG00000025921  | 744,02  | 1,05 | 3,77E-05    | 0,000598238 |
| 1036 | Stxbp4        | ENSMUSG00000020546  | 84,74   | 1,05 | 1,25E-07    | 4,44E-06    |
| 1037 | Troap         | ENSMUSG00000032783  | 11,22   | 1,05 | 0,004122785 | 0,027512818 |
| 1038 | Gm16531       | ENSMUSG00000097012  | 13,25   | 1,05 | 0,007866025 | 0,045139925 |
| 1039 | Hebp2         | ENSMUSG00000019853  | 57,73   | 1,05 | 0,001140347 | 0,009916249 |
| 1040 | Ly86          | ENSMUSG00000021423  | 36,8    | 1,05 | 0,001482837 | 0,012145587 |
| 1041 | Fam26f        | ENSMUSG00000046031  | 12,74   | 1,05 | 0,003231557 | 0,022697954 |
| 1042 | Sall2         | ENSMUSG00000049532  | 21,1    | 1,05 | 0,000304124 | 0,003361981 |
| 1043 | Adcy4         | ENSMUSG00000022220  | 19,36   | 1,05 | 0,001952383 | 0,015209891 |
| 1044 | Lama3         | ENSMUSG00000024421  | 538,23  | 1,04 | 0,001336744 | 0,011173147 |
| 1045 | Selplg        | ENSMUSG00000048163  | 41,85   | 1,04 | 0,000618396 | 0,006059399 |
| 1046 | Itga9         | ENSMUSG00000039115  | 143,31  | 1,04 | 1,94E-05    | 0,000349546 |
| 1047 | Platr29       | ENSMUSG00000084816  | 11,33   | 1,04 | 0,004207766 | 0,027943699 |
| 1048 | L3mbtl1       | ENSMUSG00000035576  | 40,39   | 1,04 | 3,78E-06    | 8,64E-05    |
| 1049 | Mup9          | ENSMUSG00000078686  | 11,31   | 1,04 | 0,00872875  | 0,048756937 |
| 1050 | D930028M14Rik | ENSMUSG00000074274  | 56,97   | 1,04 | 0,000119589 | 0,001569566 |
| 1051 | 4932702P03Rik | ENSMUSG00000086796  | 12,88   | 1,04 | 0,006254517 | 0,037764041 |
| 1052 | Ccl8          | ENSMUSG00000009185  | 89,32   | 1,04 | 0,008593626 | 0,048198045 |
| 1053 | Adgrl4        | ENSMUSG00000039167  | 160,9   | 1,04 | 0,000118578 | 0,001557173 |
| 1054 | Vil1          | ENSMUSG00000026175  | 2028,48 | 1,04 | 0,004446224 | 0,029106326 |
| 1055 | Mup17         | ENSMUSG00000096688  | 16,01   | 1,04 | 0,001647461 | 0,01319055  |
| 1056 | Zfp618        | ENSMUSG00000028358  | 280,62  | 1,03 | 1,48E-07    | 5,17E-06    |
| 1057 | Timd4         | ENSMUSG00000055546  | 17,95   | 1,03 | 0,000729151 | 0,006945286 |
| 1058 | Kctd12b       | ENSMUSG00000041633  | 244,39  | 1,03 | 5,83E-08    | 2,28E-06    |
| 1059 | Mex3a         | ENSMUSG00000074480  | 19,86   | 1,03 | 0,000621147 | 0,006070668 |
| 1060 | Gm38064       | ENSMUSG000000104482 | 17,35   | 1,03 | 0,002660751 | 0,019312437 |
| 1061 | Figl1         | ENSMUSG00000095440  | 12,58   | 1,03 | 0,004474734 | 0,029249176 |
| 1062 | Hyi           | ENSMUSG00000006395  | 53,26   | 1,03 | 9,47E-06    | 0,00019175  |
| 1063 | Arhgdib       | ENSMUSG00000030220  | 113,84  | 1,03 | 1,50E-07    | 5,24E-06    |
| 1064 | Loxl4         | ENSMUSG00000025185  | 58,55   | 1,03 | 0,000749465 | 0,007063605 |
| 1065 | Ttc16         | ENSMUSG00000039021  | 29,31   | 1,03 | 0,001944699 | 0,015167013 |
| 1066 | Fcgrt         | ENSMUSG00000003420  | 233,76  | 1,03 | 1,36E-07    | 4,79E-06    |
| 1067 | Tdo2          | ENSMUSG00000028011  | 41,34   | 1,02 | 5,90E-05    | 0,000880717 |
| 1068 | Lipt2         | ENSMUSG00000030725  | 59,65   | 1,02 | 0,000148492 | 0,001873865 |
| 1069 | Chst2         | ENSMUSG00000033350  | 42,39   | 1,02 | 0,000551427 | 0,00550953  |
| 1070 | Plat          | ENSMUSG00000031538  | 210,48  | 1,02 | 0,001923126 | 0,015037346 |
| 1071 | Csf2rb2       | ENSMUSG00000071714  | 37,66   | 1,02 | 0,002461733 | 0,018266749 |
| 1072 | Ulbp1         | ENSMUSG00000079685  | 28,67   | 1,02 | 0,001391791 | 0,011529717 |
| 1073 | Slc5a3        | ENSMUSG00000089774  | 300,6   | 1,02 | 2,56E-12    | 3,08E-10    |
| 1074 | Elk3          | ENSMUSG00000008398  | 171,18  | 1,02 | 2,03E-15    | 4,72E-13    |
| 1075 | Nfe2l3        | ENSMUSG00000029832  | 152,74  | 1,02 | 0,000325684 | 0,003550079 |
| 1076 | Stab1         | ENSMUSG00000042286  | 585,6   | 1,02 | 0,001239798 | 0,010562966 |
| 1077 | Rtn4          | ENSMUSG00000020458  | 1119,68 | 1,02 | 2,32E-08    | 1,03E-06    |
| 1078 | Ccdc122       | ENSMUSG00000034795  | 24,19   | 1,02 | 0,002047016 | 0,015788552 |
| 1079 | Hmgb3         | ENSMUSG00000015217  | 61,55   | 1,02 | 0,000524407 | 0,005289532 |

|      |               |                     |        |      |             |             |
|------|---------------|---------------------|--------|------|-------------|-------------|
| 1080 | Col10a1       | ENSMUSG00000039462  | 16,23  | 1,02 | 0,001532678 | 0,012436169 |
| 1081 | Arhgap31      | ENSMUSG00000022799  | 110,88 | 1,02 | 4,67E-07    | 1,43E-05    |
| 1082 | Crim1         | ENSMUSG00000024074  | 448,56 | 1,02 | 7,19E-10    | 4,78E-08    |
| 1083 | Pcsk9         | ENSMUSG00000044254  | 8,5    | 1,02 | 0,004808817 | 0,030926906 |
| 1084 | Paox          | ENSMUSG00000025464  | 35,19  | 1,01 | 0,001930353 | 0,015076068 |
| 1085 | Angptl7       | ENSMUSG00000028989  | 23,26  | 1,01 | 0,002510741 | 0,018513954 |
| 1086 | Csf2rb        | ENSMUSG00000071713  | 84,19  | 1,01 | 0,002613584 | 0,019053286 |
| 1087 | Adra2a        | ENSMUSG00000033717  | 75,53  | 1,01 | 0,007783244 | 0,044786373 |
| 1088 | Fcgr1         | ENSMUSG00000015947  | 38,7   | 1,01 | 0,000633942 | 0,006169737 |
| 1089 | Mis18bp1      | ENSMUSG00000047534  | 156,73 | 1,01 | 1,67E-05    | 0,000308411 |
| 1090 | Trpv4         | ENSMUSG00000014158  | 14,89  | 1,01 | 0,005524203 | 0,034297814 |
| 1091 | Fam65b        | ENSMUSG00000036006  | 57,57  | 1,01 | 1,30E-05    | 0,000250885 |
| 1092 | Ivl           | ENSMUSG00000049128  | 121,34 | 1,01 | 0,00898286  | 0,049816767 |
| 1093 | Ankar         | ENSMUSG00000039342  | 15,82  | 1,01 | 0,008693954 | 0,048608436 |
| 1094 | Thbd          | ENSMUSG00000074743  | 504,62 | 1,01 | 1,11E-06    | 3,02E-05    |
| 1095 | Adam33        | ENSMUSG00000027318  | 11,61  | 1,01 | 0,003832528 | 0,025978133 |
| 1096 | Il17rd        | ENSMUSG00000040717  | 69,04  | 1    | 0,000347793 | 0,003759008 |
| 1097 | Ido2          | ENSMUSG00000031549  | 159,81 | 1    | 0,002058841 | 0,015853487 |
| 1098 | Smox          | ENSMUSG00000027333  | 100,93 | 1    | 2,83E-07    | 9,14E-06    |
| 1099 | Prkch         | ENSMUSG00000021108  | 39,46  | 1    | 0,000152646 | 0,001910746 |
| 1100 | Slc9a5        | ENSMUSG00000014786  | 11,91  | 1    | 0,002539011 | 0,018655759 |
| 1101 | Cyp3a16       | ENSMUSG00000038656  | 15,74  | 1    | 0,002008828 | 0,015550705 |
| 1102 | 1700015O11Rik | ENSMUSG000000097671 | 11,9   | 1    | 0,005953991 | 0,036363923 |
| 1103 | Gbp4          | ENSMUSG00000079363  | 61,47  | 1    | 0,002496266 | 0,018454433 |
| 1104 | Thsd7a        | ENSMUSG00000032625  | 51,12  | 1    | 3,39E-05    | 0,000548454 |

| Rank | Gene name     | ENSEMBL ID         | baseMean | log2FC | pvalue    | padj     |
|------|---------------|--------------------|----------|--------|-----------|----------|
| 1    | Acer1         | ENSMUSG00000045019 | 211,67   | -5,08  | 3,09E-47  | 1,20E-43 |
| 2    | Npw           | ENSMUSG00000071230 | 35,22    | -4,46  | 1,63E-23  | 1,26E-20 |
| 3    | Mogat1        | ENSMUSG00000012187 | 1071,55  | -4,25  | 1,69E-54  | 1,31E-50 |
| 4    | Frmd3         | ENSMUSG00000049122 | 72,52    | -4,20  | 7,73E-26  | 9,00E-23 |
| 5    | Kcnj15        | ENSMUSG00000062609 | 836,29   | -4,19  | 3,26E-18  | 1,24E-15 |
| 6    | Gsdma2        | ENSMUSG00000017211 | 6449,91  | -4,19  | 1,34E-20  | 6,79E-18 |
| 7    | Pgc           | ENSMUSG00000023987 | 93285,61 | -4,16  | 2,35E-17  | 7,92E-15 |
| 8    | Kcnj16        | ENSMUSG00000051497 | 802,33   | -3,93  | 6,48E-16  | 1,68E-13 |
| 9    | Krt31         | ENSMUSG00000048981 | 7011,04  | -3,86  | 7,84E-15  | 1,63E-12 |
| 10   | Muc5ac        | ENSMUSG00000037974 | 50541,74 | -3,79  | 1,63E-16  | 4,62E-14 |
| 11   | Krt34         | ENSMUSG00000043485 | 2057,24  | -3,72  | 7,07E-14  | 1,16E-11 |
| 12   | Hsd17b6       | ENSMUSG00000025396 | 198,64   | -3,69  | 3,71E-23  | 2,79E-20 |
| 13   | Gif           | ENSMUSG00000024682 | 6660,82  | -3,67  | 8,06E-14  | 1,30E-11 |
| 14   | 4930438A08Rik | ENSMUSG00000069873 | 219,21   | -3,55  | 1,30E-15  | 3,19E-13 |
| 15   | 9030616G12Rik | ENSMUSG00000097691 | 45,46    | -3,54  | 3,20E-22  | 1,96E-19 |
| 16   | Dthd1         | ENSMUSG00000090326 | 17,07    | -3,46  | 5,90E-15  | 1,25E-12 |
| 17   | Iqub          | ENSMUSG00000046192 | 3788,98  | -3,34  | 4,34E-12  | 4,74E-10 |
| 18   | Apol9a        | ENSMUSG00000057346 | 34,02    | -3,32  | 2,31E-15  | 5,27E-13 |
| 19   | Fgfbp1        | ENSMUSG00000048373 | 522,95   | -3,32  | 1,99E-28  | 3,08E-25 |
| 20   | Cckbr         | ENSMUSG00000030898 | 11,81    | -3,29  | 2,40E-11  | 2,26E-09 |
| 21   | Efcab1        | ENSMUSG00000068617 | 35,22    | -3,26  | 1,50E-13  | 2,28E-11 |
| 22   | Enpp2         | ENSMUSG00000022425 | 491,37   | -3,25  | 5,48E-25  | 5,80E-22 |
| 23   | Ghrl          | ENSMUSG00000064177 | 4151,38  | -3,25  | 3,79E-13  | 5,37E-11 |
| 24   | RP23-392I2.4  | ENSMUSG00000107189 | 713,11   | -3,24  | 4,07E-11  | 3,72E-09 |
| 25   | Adh7          | ENSMUSG00000055301 | 1184,61  | -3,17  | 4,93E-19  | 2,13E-16 |
| 26   | Sst           | ENSMUSG00000004366 | 237,25   | -3,16  | 6,29E-19  | 2,61E-16 |
| 27   | Tmem151a      | ENSMUSG00000061451 | 101,31   | -3,12  | 1,02E-20  | 5,66E-18 |
| 28   | 4930509J09Rik | ENSMUSG00000102362 | 6,79     | -3,10  | 3,14E-10  | 2,26E-08 |
| 29   | Slc5a5        | ENSMUSG00000000792 | 415,52   | -3,09  | 4,62E-34  | 1,07E-30 |
| 30   | Lmod2         | ENSMUSG00000029683 | 431,89   | -3,05  | 4,85E-10  | 3,36E-08 |
| 31   | Lgals2        | ENSMUSG00000043501 | 4720,41  | -3,04  | 3,75E-17  | 1,21E-14 |
| 32   | Lypd6         | ENSMUSG00000050447 | 67,25    | -3,04  | 8,69E-19  | 3,55E-16 |
| 33   | Asb15         | ENSMUSG00000029685 | 1796,22  | -3,03  | 7,10E-10  | 4,75E-08 |
| 34   | Ranbp10       | ENSMUSG00000037415 | 989,68   | -2,97  | 5,69E-101 | 1,32E-96 |
| 35   | Sctr          | ENSMUSG00000026387 | 124,65   | -2,95  | 2,05E-40  | 5,96E-37 |
| 36   | Spem1         | ENSMUSG00000041165 | 3,75     | -2,94  | 3,56E-09  | 2,00E-07 |
| 37   | Lpar3         | ENSMUSG00000036832 | 26,41    | -2,91  | 9,35E-15  | 1,93E-12 |
| 38   | 1700028P15Rik | ENSMUSG00000086823 | 65,67    | -2,90  | 1,70E-13  | 2,56E-11 |
| 39   | Wasl          | ENSMUSG00000029684 | 3667,17  | -2,87  | 5,22E-18  | 1,90E-15 |
| 40   | Pnoc          | ENSMUSG00000045731 | 9,21     | -2,85  | 4,27E-10  | 2,97E-08 |
| 41   | Scarletltr    | ENSMUSG00000093759 | 4,42     | -2,85  | 5,06E-09  | 2,72E-07 |
| 42   | Cyt11         | ENSMUSG00000062329 | 10,13    | -2,81  | 2,23E-10  | 1,68E-08 |
| 43   | Trim50        | ENSMUSG00000053388 | 74,51    | -2,79  | 1,70E-08  | 7,91E-07 |
| 44   | Resp18        | ENSMUSG00000033061 | 103,78   | -2,79  | 4,62E-12  | 5,02E-10 |

|    |               |                    |         |       |          |          |
|----|---------------|--------------------|---------|-------|----------|----------|
| 45 | Esrrg         | ENSMUSG00000026610 | 430,82  | -2,78 | 2,64E-08 | 1,15E-06 |
| 46 | Gm14271       | ENSMUSG00000087409 | 25,98   | -2,78 | 1,82E-09 | 1,10E-07 |
| 47 | Rcan2         | ENSMUSG00000039601 | 23,13   | -2,78 | 1,09E-12 | 1,41E-10 |
| 48 | Proz          | ENSMUSG00000031445 | 67,66   | -2,77 | 8,75E-13 | 1,18E-10 |
| 49 | Aldh3a1       | ENSMUSG00000019102 | 1411,27 | -2,77 | 1,21E-09 | 7,58E-08 |
| 50 | Fam101a       | ENSMUSG00000037962 | 56,72   | -2,76 | 7,73E-27 | 1,06E-23 |
| 51 | Upk1a         | ENSMUSG00000006313 | 22,12   | -2,76 | 1,16E-15 | 2,89E-13 |
| 52 | Tmed6         | ENSMUSG00000031919 | 385,89  | -2,76 | 3,88E-15 | 8,44E-13 |
| 53 | Pdia2         | ENSMUSG00000024184 | 369,63  | -2,74 | 4,48E-08 | 1,82E-06 |
| 54 | Slc38a5       | ENSMUSG00000031170 | 10,00   | -2,73 | 1,15E-09 | 7,27E-08 |
| 55 | 2700046A07Rik | ENSMUSG00000041789 | 5,35    | -2,72 | 6,17E-09 | 3,22E-07 |
| 56 | Gm14641       | ENSMUSG00000087100 | 12,50   | -2,72 | 2,94E-10 | 2,14E-08 |
| 57 | Tnfrsf19      | ENSMUSG00000060548 | 25,18   | -2,71 | 1,63E-11 | 1,61E-09 |
| 58 | Gm15985       | ENSMUSG00000085497 | 3,61    | -2,70 | 4,19E-08 | 1,72E-06 |
| 59 | RP24-404P10.9 | ENSMUSG00000105889 | 9,81    | -2,67 | 2,20E-10 | 1,67E-08 |
| 60 | Bmpr1b        | ENSMUSG00000052430 | 92,50   | -2,66 | 2,11E-08 | 9,58E-07 |
| 61 | 4933402P03Rik | ENSMUSG00000044084 | 5,75    | -2,65 | 1,18E-07 | 4,26E-06 |
| 62 | Cyp2s1        | ENSMUSG00000040703 | 3943,93 | -2,65 | 3,25E-24 | 3,03E-21 |
| 63 | Scg2          | ENSMUSG00000050711 | 34,59   | -2,65 | 4,56E-10 | 3,17E-08 |
| 64 | Vmn1r-ps62    | ENSMUSG00000092350 | 13,26   | -2,63 | 2,33E-11 | 2,22E-09 |
| 65 | Gpt           | ENSMUSG00000022546 | 466,13  | -2,62 | 2,26E-32 | 4,77E-29 |
| 66 | Rep15         | ENSMUSG00000040121 | 2712,86 | -2,61 | 1,14E-14 | 2,30E-12 |
| 67 | Bex4          | ENSMUSG00000047844 | 7,06    | -2,60 | 8,89E-08 | 3,31E-06 |
| 68 | 3110056K07Rik | ENSMUSG00000085622 | 184,70  | -2,57 | 1,02E-11 | 1,03E-09 |
| 69 | 1700029B22Rik | ENSMUSG00000100759 | 4,13    | -2,56 | 2,68E-07 | 8,72E-06 |
| 70 | Slc2a10       | ENSMUSG00000027661 | 294,51  | -2,56 | 4,87E-48 | 2,27E-44 |
| 71 | Pga5          | ENSMUSG00000024738 | 177,46  | -2,55 | 4,02E-08 | 1,66E-06 |
| 72 | 9030622O22Rik | ENSMUSG00000086141 | 135,88  | -2,52 | 1,13E-20 | 5,83E-18 |
| 73 | Dlx2          | ENSMUSG00000023391 | 5,51    | -2,51 | 3,27E-08 | 1,39E-06 |
| 74 | Cyp27b1       | ENSMUSG00000006724 | 1703,70 | -2,49 | 9,10E-08 | 3,36E-06 |
| 75 | Gm12044       | ENSMUSG00000084412 | 2,63    | -2,49 | 5,47E-07 | 1,65E-05 |
| 76 | Slc27a6       | ENSMUSG00000024600 | 40,24   | -2,49 | 2,04E-14 | 3,83E-12 |
| 77 | Sec14l4       | ENSMUSG00000019368 | 85,64   | -2,48 | 4,73E-08 | 1,91E-06 |
| 78 | Adgrb1        | ENSMUSG00000034730 | 45,27   | -2,48 | 8,16E-10 | 5,36E-08 |
| 79 | RP24-481P22.1 | ENSMUSG00000106310 | 4,98    | -2,48 | 2,48E-07 | 8,21E-06 |
| 80 | Slc26a7       | ENSMUSG00000040569 | 124,63  | -2,47 | 6,74E-07 | 1,98E-05 |
| 81 | Nov           | ENSMUSG00000037362 | 43,21   | -2,46 | 9,74E-23 | 6,67E-20 |
| 82 | Sycn          | ENSMUSG00000084174 | 12,12   | -2,46 | 4,92E-07 | 1,50E-05 |
| 83 | Fabp3         | ENSMUSG00000028773 | 52,55   | -2,46 | 9,11E-07 | 2,55E-05 |
| 84 | Zfpm2         | ENSMUSG00000022306 | 6,26    | -2,45 | 9,36E-08 | 3,44E-06 |
| 85 | RP24-194J1.1  | ENSMUSG00000105528 | 11,91   | -2,45 | 7,27E-08 | 2,77E-06 |
| 86 | Lrrn1         | ENSMUSG00000034648 | 48,00   | -2,44 | 2,78E-08 | 1,21E-06 |
| 87 | Gm12298       | ENSMUSG00000072834 | 5,93    | -2,43 | 4,19E-07 | 1,31E-05 |
| 88 | Slc1a3        | ENSMUSG00000005360 | 129,19  | -2,42 | 1,09E-10 | 8,98E-09 |
| 89 | Cbln4         | ENSMUSG00000067578 | 12,72   | -2,42 | 1,83E-09 | 1,10E-07 |

|     |               |                    |          |       |          |             |
|-----|---------------|--------------------|----------|-------|----------|-------------|
| 90  | Gpr155        | ENSMUSG00000041762 | 335,16   | -2,42 | 1,37E-06 | 3,61E-05    |
| 91  | Amh           | ENSMUSG00000035262 | 7,03     | -2,41 | 1,55E-06 | 4,03E-05    |
| 92  | Irs4          | ENSMUSG00000054667 | 12,05    | -2,41 | 3,69E-08 | 1,54E-06    |
| 93  | Atp4a         | ENSMUSG00000005553 | 8542,26  | -2,40 | 1,36E-06 | 3,59E-05    |
| 94  | Psca          | ENSMUSG00000022598 | 42064,33 | -2,39 | 1,05E-14 | 2,14E-12    |
| 95  | Tmem28        | ENSMUSG00000071719 | 4,74     | -2,39 | 1,13E-06 | 3,05E-05    |
| 96  | Fut4          | ENSMUSG00000049307 | 271,19   | -2,39 | 1,00E-15 | 2,54E-13    |
| 97  | Slc16a7       | ENSMUSG00000020102 | 457,81   | -2,39 | 1,94E-07 | 6,60E-06    |
| 98  | Tnni3         | ENSMUSG00000035458 | 197,56   | -2,39 | 1,82E-06 | 4,64E-05    |
| 99  | Vit           | ENSMUSG00000024076 | 10,58    | -2,37 | 1,97E-08 | 9,05E-07    |
| 100 | Slc25a34      | ENSMUSG00000040740 | 33,21    | -2,37 | 9,16E-11 | 7,72E-09    |
| 101 | Ppp1r3a       | ENSMUSG00000042717 | 139,59   | -2,36 | 2,57E-06 | 6,25E-05    |
| 102 | Ctxn2         | ENSMUSG00000074872 | 2,98     | -2,36 | 2,42E-06 | 5,93E-05    |
| 103 | Arhgdig       | ENSMUSG00000073433 | 78,15    | -2,36 | 6,47E-07 | 1,90E-05    |
| 104 | Gm26705       | ENSMUSG00000097015 | 6,15     | -2,35 | 1,68E-07 | 5,82E-06    |
| 105 | Piwil4        | ENSMUSG00000036912 | 32,35    | -2,33 | 1,01E-12 | 1,34E-10    |
| 106 | Pde6b         | ENSMUSG00000029491 | 1367,28  | -2,32 | 2,68E-06 | 6,48E-05    |
| 107 | Meg3          | ENSMUSG00000021268 | 29,79    | -2,32 | 1,62E-12 | 2,01E-10    |
| 108 | Mb            | ENSMUSG00000018893 | 2,97     | -2,29 | 4,96E-06 | 0,000109694 |
| 109 | Cysrt1        | ENSMUSG00000036731 | 241,78   | -2,28 | 8,23E-12 | 8,51E-10    |
| 110 | Capn9         | ENSMUSG00000031981 | 945,20   | -2,27 | 6,85E-23 | 4,98E-20    |
| 111 | Gm3880        | ENSMUSG00000081443 | 111,70   | -2,27 | 7,04E-07 | 2,05E-05    |
| 112 | Gm11240       | ENSMUSG00000085034 | 59,03    | -2,26 | 1,55E-16 | 4,45E-14    |
| 113 | Lhfp15        | ENSMUSG00000062252 | 4,23     | -2,25 | 6,78E-06 | 0,000143502 |
| 114 | Rnf208        | ENSMUSG00000044628 | 36,90    | -2,25 | 5,29E-09 | 2,84E-07    |
| 115 | Aqp4          | ENSMUSG00000024411 | 124,83   | -2,23 | 6,76E-06 | 0,000143138 |
| 116 | Ly6g6c        | ENSMUSG00000092586 | 271,36   | -2,23 | 5,87E-13 | 8,19E-11    |
| 117 | Igfbp2        | ENSMUSG00000039323 | 74,64    | -2,23 | 2,04E-06 | 5,11E-05    |
| 118 | Klrg2         | ENSMUSG00000071537 | 57,17    | -2,22 | 7,98E-17 | 2,41E-14    |
| 119 | Chst3         | ENSMUSG00000057337 | 51,80    | -2,22 | 8,63E-06 | 0,000177292 |
| 120 | Prima1        | ENSMUSG00000041669 | 8,84     | -2,22 | 3,17E-06 | 7,50E-05    |
| 121 | Rnase1        | ENSMUSG00000035896 | 40,37    | -2,22 | 8,87E-06 | 0,000181768 |
| 122 | Drc1          | ENSMUSG00000073102 | 247,32   | -2,20 | 5,79E-09 | 3,06E-07    |
| 123 | Palm3         | ENSMUSG00000047986 | 14,20    | -2,20 | 1,14E-05 | 0,000225155 |
| 124 | Hrh2          | ENSMUSG00000034987 | 41,05    | -2,19 | 5,33E-06 | 0,000116651 |
| 125 | Psapl1        | ENSMUSG00000043430 | 6320,16  | -2,19 | 1,07E-09 | 6,85E-08    |
| 126 | Mboat4        | ENSMUSG00000071113 | 10,26    | -2,19 | 1,49E-06 | 3,90E-05    |
| 127 | RP23-114M24.1 | ENSMUSG00000107148 | 6,39     | -2,19 | 4,99E-06 | 0,000110112 |
| 128 | Diras1        | ENSMUSG00000043670 | 39,38    | -2,18 | 7,03E-07 | 2,05E-05    |
| 129 | Setd4         | ENSMUSG00000022948 | 122,22   | -2,18 | 1,69E-15 | 4,05E-13    |
| 130 | Ptgds         | ENSMUSG00000015090 | 2,62     | -2,17 | 1,52E-05 | 0,000285874 |
| 131 | Dgki          | ENSMUSG00000038665 | 503,84   | -2,17 | 9,30E-06 | 0,000188874 |
| 132 | Gria2         | ENSMUSG00000033981 | 5,73     | -2,17 | 5,34E-06 | 0,000116651 |
| 133 | Scg5          | ENSMUSG00000023236 | 94,42    | -2,17 | 2,90E-10 | 2,13E-08    |
| 134 | Clic3         | ENSMUSG00000015093 | 134,54   | -2,16 | 3,96E-14 | 6,87E-12    |

|     |               |                     |         |       |          |             |
|-----|---------------|---------------------|---------|-------|----------|-------------|
| 135 | Phyhip        | ENSMUSG00000003469  | 2,65    | -2,16 | 1,73E-05 | 0,000317354 |
| 136 | Gm26295       | ENSMUSG000000095791 | 6,85    | -2,16 | 8,89E-06 | 0,000182046 |
| 137 | Slc7a8        | ENSMUSG000000022180 | 159,14  | -2,16 | 1,68E-08 | 7,85E-07    |
| 138 | RP23-480P21.2 | ENSMUSG000000106526 | 31,27   | -2,13 | 6,68E-08 | 2,59E-06    |
| 139 | C920025E04Rik | ENSMUSG000000073405 | 50,25   | -2,13 | 7,06E-08 | 2,70E-06    |
| 140 | Amph          | ENSMUSG000000021314 | 248,12  | -2,13 | 4,33E-15 | 9,25E-13    |
| 141 | Syce3         | ENSMUSG000000078938 | 7,40    | -2,12 | 1,09E-05 | 0,000216512 |
| 142 | Gm16086       | ENSMUSG000000085120 | 3,95    | -2,12 | 2,08E-05 | 0,000372658 |
| 143 | Bhlha15       | ENSMUSG000000052271 | 44,90   | -2,12 | 6,28E-07 | 1,86E-05    |
| 144 | Rab37         | ENSMUSG000000020732 | 57,70   | -2,11 | 8,97E-10 | 5,85E-08    |
| 145 | Dusp13        | ENSMUSG000000021768 | 62,35   | -2,10 | 1,15E-10 | 9,29E-09    |
| 146 | 4930404N11Rik | ENSMUSG000000020234 | 25,92   | -2,09 | 1,32E-11 | 1,33E-09    |
| 147 | Pnliprp2      | ENSMUSG000000025091 | 284,77  | -2,09 | 2,13E-05 | 0,000378146 |
| 148 | Pcsk2         | ENSMUSG000000027419 | 172,28  | -2,09 | 6,94E-09 | 3,59E-07    |
| 149 | Alb           | ENSMUSG000000029368 | 32,92   | -2,09 | 1,55E-07 | 5,38E-06    |
| 150 | Igfbp6        | ENSMUSG000000023046 | 20,56   | -2,08 | 3,39E-07 | 1,08E-05    |
| 151 | Gsdmc3        | ENSMUSG000000055827 | 32,14   | -2,07 | 2,70E-05 | 0,000457127 |
| 152 | Rpp25         | ENSMUSG000000062309 | 221,14  | -2,07 | 1,29E-14 | 2,56E-12    |
| 153 | Rab3b         | ENSMUSG000000003411 | 498,64  | -2,07 | 2,25E-15 | 5,18E-13    |
| 154 | Atp4b         | ENSMUSG000000031449 | 4944,45 | -2,07 | 2,32E-05 | 0,000402808 |
| 155 | 1010001N08Rik | ENSMUSG000000097222 | 96,62   | -2,07 | 3,29E-10 | 2,36E-08    |
| 156 | Dcbld2        | ENSMUSG000000035107 | 365,38  | -2,06 | 9,44E-09 | 4,74E-07    |
| 157 | Fhl1          | ENSMUSG000000023092 | 6971,17 | -2,06 | 1,22E-17 | 4,23E-15    |
| 158 | Gm11695       | ENSMUSG000000085651 | 16,45   | -2,05 | 9,22E-09 | 4,64E-07    |
| 159 | Ndufa5        | ENSMUSG000000023089 | 1730,65 | -2,05 | 1,30E-17 | 4,43E-15    |
| 160 | Gpm6a         | ENSMUSG000000031517 | 56,88   | -2,05 | 4,31E-05 | 0,000672943 |
| 161 | Kcng4         | ENSMUSG000000045246 | 12,89   | -2,04 | 2,75E-05 | 0,000463702 |
| 162 | Gm12160       | ENSMUSG000000087089 | 3,36    | -2,03 | 4,53E-05 | 0,000702466 |
| 163 | Myrip         | ENSMUSG000000041794 | 16,34   | -2,02 | 9,37E-06 | 0,000190021 |
| 164 | Pnliprp1      | ENSMUSG000000042179 | 119,85  | -2,02 | 3,36E-05 | 0,000544429 |
| 165 | Tmem89        | ENSMUSG000000025652 | 3,09    | -2,02 | 5,06E-05 | 0,000772023 |
| 166 | Cpb2          | ENSMUSG000000021999 | 7,03    | -2,01 | 1,67E-05 | 0,000308613 |
| 167 | Fa2h          | ENSMUSG000000033579 | 284,63  | -2,01 | 7,00E-08 | 2,68E-06    |
| 168 | Gm21013       | ENSMUSG000000098895 | 14,69   | -2,01 | 6,34E-07 | 1,88E-05    |
| 169 | Itih2         | ENSMUSG000000037254 | 90,84   | -2,01 | 2,40E-11 | 2,26E-09    |
| 170 | Clic6         | ENSMUSG000000022949 | 1221,55 | -2,01 | 3,92E-05 | 0,000619677 |
| 171 | Anpep         | ENSMUSG000000039062 | 381,81  | -2,00 | 1,67E-10 | 1,30E-08    |
| 172 | Acacb         | ENSMUSG000000042010 | 598,10  | -2,00 | 8,98E-13 | 1,20E-10    |
| 173 | Tuba3a        | ENSMUSG000000067702 | 3,64    | -2,00 | 6,36E-05 | 0,000939221 |
| 174 | Rps6ka6       | ENSMUSG000000025665 | 13,11   | -2,00 | 3,80E-07 | 1,20E-05    |
| 175 | Gpc3          | ENSMUSG000000055653 | 41,70   | -2,00 | 7,32E-07 | 2,12E-05    |
| 176 | Cyp2d12       | ENSMUSG000000096852 | 1,76    | -1,98 | 7,55E-05 | 0,001084333 |
| 177 | Prl           | ENSMUSG000000021342 | 3,26    | -1,98 | 4,81E-05 | 0,000738343 |
| 178 | Gm13480       | ENSMUSG000000085357 | 9,03    | -1,98 | 2,11E-06 | 5,28E-05    |
| 179 | Nlk           | ENSMUSG000000017376 | 534,59  | -1,98 | 1,48E-05 | 0,000280184 |



|     |               |                    |         |       |             |             |
|-----|---------------|--------------------|---------|-------|-------------|-------------|
| 180 | Rhobtb1       | ENSMUSG00000019944 | 378,77  | -1,97 | 1,10E-20    | 5,82E-18    |
| 181 | Gm37899       | ENSMUSG00000102657 | 5,11    | -1,96 | 3,60E-05    | 0,000577851 |
| 182 | Tppp3         | ENSMUSG00000014846 | 182,33  | -1,96 | 2,10E-19    | 9,58E-17    |
| 183 | Fabp3-ps1     | ENSMUSG00000056366 | 102,65  | -1,96 | 6,45E-05    | 0,000948498 |
| 184 | Rdh7          | ENSMUSG00000040134 | 199,70  | -1,96 | 1,92E-07    | 6,54E-06    |
| 185 | Npb           | ENSMUSG00000044034 | 42,10   | -1,96 | 9,05E-07    | 2,54E-05    |
| 186 | Slitrk3       | ENSMUSG00000048304 | 4,29    | -1,95 | 7,89E-05    | 0,001118793 |
| 187 | Kcne2         | ENSMUSG00000039672 | 306,60  | -1,95 | 6,08E-05    | 0,000904404 |
| 188 | Sdr9c7        | ENSMUSG00000040127 | 73,71   | -1,95 | 9,18E-05    | 0,001262467 |
| 189 | Eno2          | ENSMUSG00000004267 | 128,91  | -1,95 | 1,65E-14    | 3,22E-12    |
| 190 | Cyp2c68       | ENSMUSG00000074882 | 35,30   | -1,95 | 1,36E-07    | 4,79E-06    |
| 191 | Dmbx1         | ENSMUSG00000028707 | 11,73   | -1,94 | 3,73E-05    | 0,000592769 |
| 192 | Zar1          | ENSMUSG00000063935 | 18,74   | -1,94 | 6,98E-05    | 0,001015813 |
| 193 | 1700013N06Rik | ENSMUSG00000085801 | 14,64   | -1,94 | 0,000115223 | 0,001524697 |
| 194 | Rian          | ENSMUSG00000097451 | 82,34   | -1,94 | 7,32E-10    | 4,86E-08    |
| 195 | Tex15         | ENSMUSG00000009628 | 79,59   | -1,93 | 6,11E-05    | 0,000908943 |
| 196 | Tmem27        | ENSMUSG00000015401 | 6,80    | -1,93 | 2,47E-05    | 0,000422715 |
| 197 | RP23-319P12.4 | ENSMUSG00000107363 | 2,67    | -1,93 | 0,000118009 | 0,001552327 |
| 198 | Cox7a1        | ENSMUSG00000074218 | 282,07  | -1,93 | 2,82E-05    | 0,000473507 |
| 199 | Stk32a        | ENSMUSG00000039954 | 7,72    | -1,93 | 4,87E-06    | 0,000107935 |
| 200 | Gm14328       | ENSMUSG00000095419 | 267,76  | -1,93 | 1,31E-09    | 8,15E-08    |
| 201 | Fam19a5       | ENSMUSG00000054863 | 14,52   | -1,92 | 2,50E-07    | 8,26E-06    |
| 202 | Ifi27l2b      | ENSMUSG00000021208 | 600,19  | -1,92 | 1,08E-09    | 6,91E-08    |
| 203 | Fam228a       | ENSMUSG00000079177 | 295,63  | -1,92 | 8,50E-11    | 7,22E-09    |
| 204 | Tmem246       | ENSMUSG00000039611 | 538,16  | -1,91 | 1,53E-16    | 4,45E-14    |
| 205 | Mia           | ENSMUSG00000089661 | 22,28   | -1,91 | 2,58E-07    | 8,46E-06    |
| 206 | Ddo           | ENSMUSG00000063428 | 46,80   | -1,91 | 3,26E-06    | 7,69E-05    |
| 207 | Cecr2         | ENSMUSG00000071226 | 14,30   | -1,90 | 3,36E-06    | 7,85E-05    |
| 208 | Gper1         | ENSMUSG00000053647 | 36,13   | -1,90 | 0,000141683 | 0,001809524 |
| 209 | Hamp          | ENSMUSG00000050440 | 4,11    | -1,90 | 0,000153495 | 0,001917565 |
| 210 | Gm4128        | ENSMUSG00000085352 | 6,39    | -1,89 | 2,79E-05    | 0,000469222 |
| 211 | Slc16a5       | ENSMUSG00000045775 | 220,59  | -1,89 | 1,99E-15    | 4,68E-13    |
| 212 | Hal           | ENSMUSG00000020017 | 84,28   | -1,89 | 2,68E-15    | 6,06E-13    |
| 213 | Plag1         | ENSMUSG00000003282 | 26,33   | -1,89 | 1,37E-08    | 6,64E-07    |
| 214 | Pstpip1       | ENSMUSG00000032322 | 272,54  | -1,88 | 4,51E-11    | 4,07E-09    |
| 215 | Syp           | ENSMUSG00000031144 | 37,94   | -1,88 | 2,51E-09    | 1,46E-07    |
| 216 | Gm15325       | ENSMUSG00000086861 | 11,82   | -1,88 | 2,02E-07    | 6,81E-06    |
| 217 | Fads6         | ENSMUSG00000044788 | 67,76   | -1,88 | 0,000100639 | 0,001362815 |
| 218 | Zcchc5        | ENSMUSG00000047686 | 8,69    | -1,87 | 9,13E-06    | 0,000186252 |
| 219 | Foxa2         | ENSMUSG00000037025 | 266,28  | -1,87 | 7,72E-27    | 1,06E-23    |
| 220 | Cd36          | ENSMUSG00000002944 | 454,68  | -1,87 | 8,83E-06    | 0,000181155 |
| 221 | Ppp2r2b       | ENSMUSG00000024500 | 13,06   | -1,87 | 8,79E-05    | 0,001220597 |
| 222 | Umod          | ENSMUSG00000030963 | 7,20    | -1,87 | 0,000150555 | 0,001894762 |
| 223 | Tmem189       | ENSMUSG00000090213 | 1434,05 | -1,87 | 2,33E-14    | 4,23E-12    |
| 224 | Ccdc154       | ENSMUSG00000059562 | 22,16   | -1,86 | 7,45E-08    | 2,83E-06    |

|     |               |                    |          |       |             |             |
|-----|---------------|--------------------|----------|-------|-------------|-------------|
| 225 | Gm5514        | ENSMUSG00000045104 | 25,20    | -1,86 | 5,20E-05    | 0,00079017  |
| 226 | 4930512H18Rik | ENSMUSG00000086866 | 2,93     | -1,86 | 0,000220173 | 0,002581075 |
| 227 | Ak3l2-ps      | ENSMUSG00000081957 | 5,17     | -1,86 | 0,000220346 | 0,002581803 |
| 228 | Ttr           | ENSMUSG00000061808 | 550,81   | -1,85 | 1,15E-09    | 7,27E-08    |
| 229 | Bex1          | ENSMUSG00000050071 | 3,61     | -1,85 | 0,000200888 | 0,002396038 |
| 230 | Tnn           | ENSMUSG00000026725 | 138,15   | -1,85 | 1,02E-13    | 1,58E-11    |
| 231 | Atf3          | ENSMUSG00000026628 | 257,24   | -1,85 | 2,78E-07    | 9,00E-06    |
| 232 | Gm6166        | ENSMUSG00000074280 | 151,56   | -1,85 | 3,00E-12    | 3,49E-10    |
| 233 | Gm15915       | ENSMUSG00000085723 | 65,95    | -1,85 | 8,48E-10    | 5,56E-08    |
| 234 | St8sia5       | ENSMUSG00000025425 | 3,85     | -1,84 | 0,000244638 | 0,002802919 |
| 235 | Timp4         | ENSMUSG00000030317 | 3,28     | -1,84 | 0,000137893 | 0,001774763 |
| 236 | Gm12892       | ENSMUSG00000083679 | 76,56    | -1,84 | 6,66E-06    | 0,00014187  |
| 237 | Zcchc12       | ENSMUSG00000036699 | 6,60     | -1,84 | 0,000227034 | 0,002644186 |
| 238 | Apol7a        | ENSMUSG00000010601 | 605,95   | -1,83 | 1,63E-09    | 9,91E-08    |
| 239 | Gm29040       | ENSMUSG00000099576 | 4,32     | -1,83 | 0,000224789 | 0,002623284 |
| 240 | Nr0b2         | ENSMUSG00000037583 | 16,19    | -1,83 | 8,21E-05    | 0,00115405  |
| 241 | Tff1          | ENSMUSG00000024032 | 32166,16 | -1,83 | 1,85E-09    | 1,10E-07    |
| 242 | Gnmt          | ENSMUSG00000002769 | 13,43    | -1,83 | 2,61E-06    | 6,34E-05    |
| 243 | Serpina5      | ENSMUSG00000041550 | 5,35     | -1,83 | 0,00023717  | 0,002737714 |
| 244 | Gm16439       | ENSMUSG00000072594 | 53,25    | -1,83 | 3,58E-09    | 2,00E-07    |
| 245 | Bnip3         | ENSMUSG00000078566 | 442,56   | -1,82 | 4,85E-11    | 4,34E-09    |
| 246 | Klhl38        | ENSMUSG00000022357 | 3,22     | -1,82 | 0,000284221 | 0,003192004 |
| 247 | Gm13131       | ENSMUSG00000081772 | 59,86    | -1,82 | 1,94E-15    | 4,61E-13    |
| 248 | Ces2c         | ENSMUSG00000061825 | 3496,88  | -1,82 | 1,60E-08    | 7,53E-07    |
| 249 | Gm29346       | ENSMUSG00000101386 | 4,05     | -1,82 | 6,41E-05    | 0,000943969 |
| 250 | Sis           | ENSMUSG00000027790 | 286,27   | -1,82 | 5,01E-14    | 8,44E-12    |
| 251 | Adhfe1        | ENSMUSG00000025911 | 50,41    | -1,81 | 1,18E-07    | 4,24E-06    |
| 252 | 5830416P10Rik | ENSMUSG00000097636 | 26,42    | -1,81 | 1,68E-06    | 4,33E-05    |
| 253 | Gm2885        | ENSMUSG00000097103 | 2,11     | -1,81 | 0,000227527 | 0,002648597 |
| 254 | Gm5868        | ENSMUSG00000060204 | 12,80    | -1,81 | 0,000233763 | 0,002706303 |
| 255 | Gm5457        | ENSMUSG00000021741 | 78,70    | -1,81 | 2,27E-10    | 1,69E-08    |
| 256 | Itm2a         | ENSMUSG00000031239 | 29,96    | -1,80 | 6,92E-10    | 4,66E-08    |
| 257 | Maob          | ENSMUSG00000040147 | 160,22   | -1,80 | 6,30E-12    | 6,70E-10    |
| 258 | Col4a4        | ENSMUSG00000067158 | 22,18    | -1,80 | 8,38E-05    | 0,001172555 |
| 259 | Aldh3b2       | ENSMUSG00000075296 | 223,31   | -1,79 | 3,21E-08    | 1,37E-06    |
| 260 | Me2           | ENSMUSG00000024556 | 2746,89  | -1,79 | 3,39E-09    | 1,92E-07    |
| 261 | Cdkn1c        | ENSMUSG00000037664 | 63,25    | -1,79 | 2,95E-08    | 1,28E-06    |
| 262 | Derl3         | ENSMUSG00000009092 | 30,62    | -1,79 | 9,44E-05    | 0,001291616 |
| 263 | Fam228b       | ENSMUSG00000050545 | 44,19    | -1,78 | 1,23E-08    | 6,02E-07    |
| 264 | Gm16085       | ENSMUSG00000086037 | 6,40     | -1,78 | 0,000354425 | 0,003820037 |
| 265 | Bpifb3        | ENSMUSG00000068008 | 28,41    | -1,78 | 1,64E-06    | 4,24E-05    |
| 266 | 6030407O03Rik | ENSMUSG00000100301 | 8,05     | -1,78 | 5,39E-05    | 0,000811532 |
| 267 | Pttg1ip       | ENSMUSG00000009291 | 3181,93  | -1,78 | 1,65E-11    | 1,62E-09    |
| 268 | 4932414J04Rik | ENSMUSG00000078962 | 42,25    | -1,78 | 9,94E-14    | 1,55E-11    |
| 269 | Ogdhl         | ENSMUSG00000021913 | 44,00    | -1,78 | 4,31E-07    | 1,34E-05    |

|     |               |                    |         |       |             |             |
|-----|---------------|--------------------|---------|-------|-------------|-------------|
| 270 | Mt3           | ENSMUSG00000031760 | 2,90    | -1,77 | 0,000280989 | 0,003158756 |
| 271 | Cyp2u1        | ENSMUSG00000027983 | 29,27   | -1,77 | 4,56E-05    | 0,000706105 |
| 272 | Cadm2         | ENSMUSG00000064115 | 6,24    | -1,77 | 0,00029629  | 0,003294251 |
| 273 | Pcsk1         | ENSMUSG00000021587 | 143,31  | -1,76 | 2,02E-08    | 9,24E-07    |
| 274 | Fabp5         | ENSMUSG00000027533 | 1471,00 | -1,76 | 1,32E-07    | 4,69E-06    |
| 275 | Fbln1         | ENSMUSG00000006369 | 501,04  | -1,76 | 4,11E-10    | 2,89E-08    |
| 276 | Sgk2          | ENSMUSG00000017868 | 147,90  | -1,76 | 4,07E-16    | 1,06E-13    |
| 277 | G630090E17Rik | ENSMUSG00000071335 | 29,92   | -1,76 | 1,20E-08    | 5,88E-07    |
| 278 | Cntn4         | ENSMUSG00000064293 | 105,38  | -1,76 | 3,79E-08    | 1,58E-06    |
| 279 | Mfsd7a        | ENSMUSG00000029490 | 184,19  | -1,76 | 2,38E-11    | 2,26E-09    |
| 280 | Atp13a4       | ENSMUSG00000038094 | 8,94    | -1,76 | 0,000314667 | 0,003452285 |
| 281 | Rasef         | ENSMUSG00000043003 | 2662,38 | -1,75 | 5,41E-19    | 2,29E-16    |
| 282 | Clca4a        | ENSMUSG00000068547 | 47,01   | -1,75 | 9,74E-06    | 0,000195973 |
| 283 | Cpa1          | ENSMUSG00000054446 | 29,59   | -1,75 | 3,29E-06    | 7,72E-05    |
| 284 | Pla2g12b      | ENSMUSG00000009646 | 191,62  | -1,73 | 7,78E-11    | 6,66E-09    |
| 285 | Nupr1         | ENSMUSG00000030717 | 490,08  | -1,73 | 3,47E-06    | 8,05E-05    |
| 286 | 4930550C17Rik | ENSMUSG00000097361 | 13,38   | -1,73 | 3,85E-06    | 8,78E-05    |
| 287 | Paqr7         | ENSMUSG00000037348 | 588,86  | -1,73 | 1,14E-23    | 9,15E-21    |
| 288 | Gm15241       | ENSMUSG00000087505 | 4,97    | -1,73 | 0,000577458 | 0,005725374 |
| 289 | Pla2g1b       | ENSMUSG00000029522 | 9820,76 | -1,73 | 0,00031196  | 0,00342905  |
| 290 | Apoc1         | ENSMUSG00000040564 | 12,20   | -1,72 | 2,37E-05    | 0,00041021  |
| 291 | Gm15910       | ENSMUSG00000087480 | 35,72   | -1,72 | 5,41E-11    | 4,75E-09    |
| 292 | Ndrp2         | ENSMUSG00000004558 | 196,55  | -1,72 | 2,37E-07    | 7,89E-06    |
| 293 | Sfrp5         | ENSMUSG00000018822 | 6,69    | -1,72 | 3,15E-05    | 0,000517611 |
| 294 | Cyp2d37-ps    | ENSMUSG00000075517 | 40,62   | -1,72 | 3,38E-06    | 7,89E-05    |
| 295 | Gabrq         | ENSMUSG00000031344 | 2,38    | -1,72 | 0,000644739 | 0,006253891 |
| 296 | Ak4           | ENSMUSG00000028527 | 242,92  | -1,71 | 2,97E-10    | 2,16E-08    |
| 297 | Npc1l1        | ENSMUSG00000020447 | 125,27  | -1,71 | 0,000200226 | 0,002391811 |
| 298 | Syt7          | ENSMUSG00000024743 | 235,45  | -1,71 | 2,07E-08    | 9,41E-07    |
| 299 | Fgb           | ENSMUSG00000033831 | 90,36   | -1,70 | 6,01E-11    | 5,24E-09    |
| 300 | Trpm3         | ENSMUSG00000052387 | 2,74    | -1,70 | 0,000681588 | 0,006556661 |
| 301 | C1qtnf3       | ENSMUSG00000058914 | 12,84   | -1,69 | 0,00011633  | 0,00153458  |
| 302 | Gm38193       | ENSMUSG00000102306 | 8,09    | -1,69 | 7,71E-05    | 0,001101257 |
| 303 | Dsc3          | ENSMUSG00000059898 | 4,88    | -1,69 | 0,000153521 | 0,001917565 |
| 304 | 9130409J20Rik | ENSMUSG00000085683 | 724,61  | -1,69 | 2,92E-10    | 2,13E-08    |
| 305 | Wnt16         | ENSMUSG00000029671 | 5,09    | -1,68 | 0,000231506 | 0,002685514 |
| 306 | Tst           | ENSMUSG00000044986 | 1168,12 | -1,68 | 3,05E-18    | 1,18E-15    |
| 307 | Agr3          | ENSMUSG00000036231 | 25,89   | -1,68 | 1,62E-08    | 7,64E-07    |
| 308 | Cdk1          | ENSMUSG00000020990 | 12,99   | -1,68 | 0,000124595 | 0,001620646 |
| 309 | Tmprss9       | ENSMUSG00000059406 | 69,54   | -1,67 | 0,00041959  | 0,004390225 |
| 310 | Thnsl2        | ENSMUSG00000054474 | 49,44   | -1,67 | 1,57E-05    | 0,000292235 |
| 311 | Sytl4         | ENSMUSG00000031255 | 307,46  | -1,67 | 9,14E-14    | 1,46E-11    |
| 312 | BC024139      | ENSMUSG00000044361 | 2,62    | -1,67 | 0,000884714 | 0,008089313 |
| 313 | Hecw2         | ENSMUSG00000042807 | 382,70  | -1,67 | 9,48E-05    | 0,001296678 |
| 314 | Sstr2         | ENSMUSG00000047904 | 48,44   | -1,67 | 1,31E-06    | 3,47E-05    |

|     |               |                    |           |       |             |             |
|-----|---------------|--------------------|-----------|-------|-------------|-------------|
| 315 | Rnf17         | ENSMUSG00000000365 | 2,69      | -1,67 | 0,000737668 | 0,006992067 |
| 316 | 1700016K19Rik | ENSMUSG00000053783 | 30,79     | -1,66 | 9,66E-10    | 6,28E-08    |
| 317 | Fabp12        | ENSMUSG00000027530 | 27,95     | -1,66 | 0,000478692 | 0,004898485 |
| 318 | Gm5067        | ENSMUSG00000090671 | 2,27      | -1,66 | 0,000746891 | 0,007045055 |
| 319 | Gkn1          | ENSMUSG00000030050 | 300622,05 | -1,66 | 4,04E-07    | 1,27E-05    |
| 320 | Gm13409       | ENSMUSG00000083172 | 39,04     | -1,66 | 2,28E-05    | 0,000398843 |
| 321 | Foxo6         | ENSMUSG00000052135 | 2,10      | -1,66 | 0,000908761 | 0,00825083  |
| 322 | Ucma          | ENSMUSG00000026668 | 10,48     | -1,65 | 2,98E-05    | 0,000493848 |
| 323 | Gm5678        | ENSMUSG00000082815 | 62,13     | -1,65 | 1,80E-07    | 6,15E-06    |
| 324 | Aldh6a1       | ENSMUSG00000021238 | 869,11    | -1,65 | 3,33E-06    | 7,80E-05    |
| 325 | Nudt11        | ENSMUSG00000073295 | 1,96      | -1,64 | 0,001066345 | 0,009392073 |
| 326 | Sntb1         | ENSMUSG00000060429 | 51,93     | -1,64 | 3,48E-06    | 8,06E-05    |
| 327 | Gm14450       | ENSMUSG00000081661 | 11,40     | -1,64 | 2,07E-05    | 0,000370636 |
| 328 | Slc5a9        | ENSMUSG00000028544 | 555,77    | -1,64 | 0,000890052 | 0,008125345 |
| 329 | Ckb           | ENSMUSG00000001270 | 353,29    | -1,64 | 0,000146965 | 0,001857622 |
| 330 | RP23-319P12.3 | ENSMUSG00000106673 | 2,06      | -1,63 | 0,001169877 | 0,010108811 |
| 331 | Gm26894       | ENSMUSG00000097453 | 395,50    | -1,63 | 7,93E-07    | 2,28E-05    |
| 332 | Fsip1         | ENSMUSG00000027344 | 179,36    | -1,63 | 5,96E-06    | 0,000128683 |
| 333 | Slitrk1       | ENSMUSG00000075478 | 3,79      | -1,63 | 0,00084327  | 0,007777607 |
| 334 | Mreg          | ENSMUSG00000039395 | 13,17     | -1,63 | 0,000389568 | 0,004135601 |
| 335 | Arx           | ENSMUSG00000035277 | 5,76      | -1,62 | 0,000470411 | 0,004830742 |
| 336 | Capn8         | ENSMUSG00000038599 | 1416,55   | -1,62 | 2,31E-09    | 1,36E-07    |
| 337 | RP23-319P12.2 | ENSMUSG00000106753 | 2,36      | -1,62 | 0,001211945 | 0,010364559 |
| 338 | Kctd8         | ENSMUSG00000037653 | 3,41      | -1,62 | 0,001216424 | 0,010383782 |
| 339 | Gpr37         | ENSMUSG00000039904 | 8,06      | -1,62 | 0,000123194 | 0,001607812 |
| 340 | Cyp4f39       | ENSMUSG00000061126 | 108,45    | -1,62 | 3,35E-06    | 7,85E-05    |
| 341 | Kif1a         | ENSMUSG00000014602 | 35,72     | -1,62 | 7,23E-06    | 0,000152255 |
| 342 | Hs3st3b1      | ENSMUSG00000070407 | 1342,48   | -1,62 | 1,13E-09    | 7,15E-08    |
| 343 | Fam189a2      | ENSMUSG00000071604 | 26,15     | -1,62 | 0,001263298 | 0,010711684 |
| 344 | Ces2a         | ENSMUSG00000055730 | 445,66    | -1,61 | 9,79E-07    | 2,72E-05    |
| 345 | Zkscan16      | ENSMUSG00000038630 | 3,60      | -1,61 | 0,001275959 | 0,010781251 |
| 346 | Gm4631        | ENSMUSG00000078899 | 2,00      | -1,61 | 0,001326078 | 0,011107932 |
| 347 | Mamdc2        | ENSMUSG00000033207 | 41,18     | -1,61 | 0,000757115 | 0,007127054 |
| 348 | Mum1l1        | ENSMUSG00000042515 | 11,51     | -1,61 | 0,000263594 | 0,002986283 |
| 349 | B3galt1       | ENSMUSG00000034780 | 51,65     | -1,61 | 4,13E-08    | 1,70E-06    |
| 350 | Lbh           | ENSMUSG00000024063 | 1540,72   | -1,61 | 1,24E-24    | 1,25E-21    |
| 351 | Mir5128       | ENSMUSG00000092958 | 1,59      | -1,61 | 0,001124567 | 0,009804675 |
| 352 | Six4          | ENSMUSG00000034460 | 9,08      | -1,61 | 0,001159301 | 0,010043537 |
| 353 | Siah2         | ENSMUSG00000036432 | 978,44    | -1,61 | 2,03E-14    | 3,83E-12    |
| 354 | Gkn2          | ENSMUSG00000030049 | 353045,43 | -1,60 | 3,68E-06    | 8,44E-05    |
| 355 | Sfxn2         | ENSMUSG00000025036 | 87,67     | -1,60 | 1,31E-06    | 3,48E-05    |
| 356 | Dusp14        | ENSMUSG00000018648 | 23008,48  | -1,60 | 3,05E-08    | 1,32E-06    |
| 357 | 2010308F09Rik | ENSMUSG00000100714 | 2,90      | -1,60 | 0,00137062  | 0,011394902 |
| 358 | Gdap1         | ENSMUSG00000025777 | 4,02      | -1,60 | 0,001219522 | 0,010406408 |
| 359 | Mgst3         | ENSMUSG00000026688 | 21934,71  | -1,60 | 2,76E-08    | 1,21E-06    |

|     |               |                    |         |       |             |             |
|-----|---------------|--------------------|---------|-------|-------------|-------------|
| 360 | Gm13433       | ENSMUSG00000083043 | 114,17  | -1,60 | 2,70E-10    | 1,99E-08    |
| 361 | Nefm          | ENSMUSG00000022054 | 3,52    | -1,60 | 0,001307972 | 0,010987906 |
| 362 | Cldn8         | ENSMUSG00000050520 | 18,64   | -1,59 | 0,001402688 | 0,011599342 |
| 363 | Gal3st1       | ENSMUSG00000049721 | 1215,42 | -1,59 | 2,72E-13    | 3,90E-11    |
| 364 | Upk3a         | ENSMUSG00000022435 | 4,11    | -1,59 | 0,00020245  | 0,002413432 |
| 365 | Ar            | ENSMUSG00000046532 | 16,74   | -1,59 | 2,40E-05    | 0,000414283 |
| 366 | Prlr          | ENSMUSG00000005268 | 49,04   | -1,59 | 0,001455992 | 0,011959383 |
| 367 | Akr1c19       | ENSMUSG00000071551 | 186,36  | -1,59 | 3,19E-11    | 2,95E-09    |
| 368 | Gm12046       | ENSMUSG00000082040 | 2,05    | -1,58 | 0,001510228 | 0,012312635 |
| 369 | Lrrc4         | ENSMUSG00000049939 | 83,97   | -1,58 | 1,50E-08    | 7,18E-07    |
| 370 | Kcna1         | ENSMUSG00000047976 | 5,96    | -1,58 | 0,001144927 | 0,009944922 |
| 371 | Gm27167       | ENSMUSG00000098534 | 6,71    | -1,58 | 0,000531248 | 0,005344633 |
| 372 | Fkbp6         | ENSMUSG00000040013 | 5,21    | -1,58 | 0,0014922   | 0,012205098 |
| 373 | Fzd10         | ENSMUSG00000081683 | 51,80   | -1,57 | 0,000263092 | 0,002983505 |
| 374 | Sult1d1       | ENSMUSG00000029273 | 2690,74 | -1,57 | 2,84E-10    | 2,09E-08    |
| 375 | Grpr          | ENSMUSG00000031364 | 3,29    | -1,57 | 0,00149546  | 0,01222746  |
| 376 | Pcp4l1        | ENSMUSG00000038370 | 186,69  | -1,57 | 1,46E-05    | 0,00027597  |
| 377 | 2210011C24Rik | ENSMUSG00000074217 | 112,80  | -1,57 | 8,74E-09    | 4,44E-07    |
| 378 | Tmem184a      | ENSMUSG00000036687 | 496,42  | -1,57 | 1,10E-20    | 5,82E-18    |
| 379 | Ldhb          | ENSMUSG00000030246 | 411,07  | -1,57 | 0,000519074 | 0,005249392 |
| 380 | Rfx2          | ENSMUSG00000024206 | 24,64   | -1,57 | 5,29E-07    | 1,60E-05    |
| 381 | Cma1          | ENSMUSG00000022225 | 34,76   | -1,57 | 1,95E-06    | 4,95E-05    |
| 382 | Gm24105       | ENSMUSG00000092674 | 11,92   | -1,56 | 0,000238448 | 0,002744156 |
| 383 | Pnmal2        | ENSMUSG00000070802 | 34,50   | -1,56 | 6,39E-11    | 5,55E-09    |
| 384 | Slc25a23      | ENSMUSG00000046329 | 82,55   | -1,56 | 1,68E-06    | 4,32E-05    |
| 385 | Ceacam10      | ENSMUSG00000054169 | 22,35   | -1,56 | 0,000618439 | 0,006059399 |
| 386 | Dbpht2        | ENSMUSG00000029878 | 22,90   | -1,55 | 1,50E-05    | 0,000282255 |
| 387 | Gm22806       | ENSMUSG00000064672 | 7,87    | -1,55 | 0,000585714 | 0,005792424 |
| 388 | Ifi27l2a      | ENSMUSG00000079017 | 223,95  | -1,54 | 6,37E-06    | 0,000136771 |
| 389 | Gm13274       | ENSMUSG00000086074 | 17,00   | -1,54 | 2,75E-06    | 6,60E-05    |
| 390 | Astn2         | ENSMUSG00000028373 | 153,92  | -1,54 | 5,36E-08    | 2,12E-06    |
| 391 | Rap1gap2      | ENSMUSG00000038807 | 675,85  | -1,54 | 1,13E-10    | 9,24E-09    |
| 392 | Prdm9         | ENSMUSG00000051977 | 309,82  | -1,53 | 4,39E-07    | 1,36E-05    |
| 393 | Mitf          | ENSMUSG00000035158 | 93,30   | -1,53 | 3,19E-06    | 7,54E-05    |
| 394 | A4gnt         | ENSMUSG00000037953 | 1137,40 | -1,53 | 1,04E-07    | 3,75E-06    |
| 395 | Mrln          | ENSMUSG00000019933 | 16,30   | -1,53 | 0,000261652 | 0,002970066 |
| 396 | 4930539E08Rik | ENSMUSG00000048905 | 434,21  | -1,53 | 3,23E-06    | 7,63E-05    |
| 397 | 5330413P13Rik | ENSMUSG00000086822 | 1,65    | -1,53 | 0,002405877 | 0,017949588 |
| 398 | Gm16159       | ENSMUSG00000086134 | 4757,51 | -1,52 | 5,38E-08    | 2,12E-06    |
| 399 | Chpt1         | ENSMUSG00000060002 | 1562,31 | -1,52 | 1,14E-10    | 9,29E-09    |
| 400 | Gm15935       | ENSMUSG00000084940 | 3,91    | -1,52 | 0,001074267 | 0,009433874 |
| 401 | Krt78         | ENSMUSG00000050463 | 200,90  | -1,52 | 1,98E-06    | 5,00E-05    |
| 402 | Lgr5          | ENSMUSG00000020140 | 131,67  | -1,52 | 2,17E-08    | 9,79E-07    |
| 403 | Odf3b         | ENSMUSG00000047394 | 9,50    | -1,51 | 0,000701615 | 0,006713228 |
| 404 | Cd59a         | ENSMUSG00000032679 | 386,72  | -1,51 | 1,41E-08    | 6,84E-07    |

|     |               |                    |          |       |             |             |
|-----|---------------|--------------------|----------|-------|-------------|-------------|
| 405 | Gm11899       | ENSMUSG00000087399 | 19,42    | -1,51 | 1,18E-05    | 0,00023101  |
| 406 | Kcng1         | ENSMUSG00000074575 | 2,63     | -1,51 | 0,002399198 | 0,017911243 |
| 407 | Gm5049        | ENSMUSG00000102399 | 13,25    | -1,51 | 8,50E-06    | 0,000175347 |
| 408 | Rhod          | ENSMUSG00000041845 | 130,52   | -1,51 | 3,52E-10    | 2,51E-08    |
| 409 | Nol4          | ENSMUSG00000041923 | 4,09     | -1,50 | 0,00201968  | 0,015608749 |
| 410 | Gm16099       | ENSMUSG00000087114 | 9,76     | -1,50 | 0,001729695 | 0,013727828 |
| 411 | Gga2          | ENSMUSG00000030872 | 279,13   | -1,50 | 0,001285884 | 0,010853293 |
| 412 | 2500002B13Rik | ENSMUSG00000096917 | 66,60    | -1,49 | 3,88E-06    | 8,83E-05    |
| 413 | A230077H06Rik | ENSMUSG00000100600 | 28,13    | -1,49 | 3,70E-05    | 0,000588772 |
| 414 | Plin4         | ENSMUSG00000002831 | 36,67    | -1,49 | 2,94E-05    | 0,000489636 |
| 415 | Unc80         | ENSMUSG00000055567 | 33,38    | -1,49 | 4,22E-07    | 1,32E-05    |
| 416 | Oxct1         | ENSMUSG00000022186 | 1352,80  | -1,49 | 0,000739707 | 0,007002845 |
| 417 | Sgms2         | ENSMUSG00000050931 | 1103,16  | -1,49 | 2,89E-12    | 3,40E-10    |
| 418 | Fabp2         | ENSMUSG00000023057 | 781,24   | -1,49 | 0,000933488 | 0,008431255 |
| 419 | Isl1          | ENSMUSG00000042258 | 76,97    | -1,49 | 3,20E-05    | 0,000522808 |
| 420 | Vsig1         | ENSMUSG00000031430 | 7070,69  | -1,49 | 3,21E-15    | 7,18E-13    |
| 421 | RP23-187D22.6 | ENSMUSG00000104655 | 3,50     | -1,48 | 0,002529117 | 0,018594805 |
| 422 | 4921507L20Rik | ENSMUSG00000027196 | 24,21    | -1,48 | 2,27E-07    | 7,61E-06    |
| 423 | P3h4          | ENSMUSG00000006931 | 97,65    | -1,48 | 3,87E-08    | 1,60E-06    |
| 424 | Tnxb          | ENSMUSG00000033327 | 210,95   | -1,48 | 3,21E-08    | 1,37E-06    |
| 425 | Ppfia3        | ENSMUSG00000003863 | 35,68    | -1,48 | 7,50E-07    | 2,17E-05    |
| 426 | Mllt3         | ENSMUSG00000028496 | 1681,31  | -1,48 | 4,59E-18    | 1,70E-15    |
| 427 | 4930593A02Rik | ENSMUSG00000097725 | 787,48   | -1,48 | 1,22E-07    | 4,38E-06    |
| 428 | Gng7          | ENSMUSG00000048240 | 151,80   | -1,47 | 6,78E-05    | 0,0009905   |
| 429 | Ptgr1         | ENSMUSG00000028378 | 13798,25 | -1,47 | 2,38E-10    | 1,77E-08    |
| 430 | B3galt5       | ENSMUSG00000074892 | 1101,44  | -1,47 | 2,18E-05    | 0,000385269 |
| 431 | Slc22a17      | ENSMUSG00000022199 | 20,83    | -1,47 | 2,45E-05    | 0,000419705 |
| 432 | Nqo1          | ENSMUSG00000003849 | 13477,01 | -1,47 | 2,76E-06    | 6,63E-05    |
| 433 | Il31ra        | ENSMUSG00000050377 | 4,04     | -1,47 | 0,002987236 | 0,021251297 |
| 434 | Acox2         | ENSMUSG00000021751 | 135,62   | -1,47 | 0,002305982 | 0,017360143 |
| 435 | Creb5         | ENSMUSG00000053007 | 50,55    | -1,47 | 2,04E-06    | 5,11E-05    |
| 436 | Gpt2          | ENSMUSG00000031700 | 897,93   | -1,47 | 1,57E-11    | 1,57E-09    |
| 437 | Gm26714       | ENSMUSG00000097654 | 15,23    | -1,46 | 2,87E-06    | 6,86E-05    |
| 438 | Gm37386       | ENSMUSG00000103127 | 6,92     | -1,46 | 0,003227116 | 0,022680453 |
| 439 | Bex2          | ENSMUSG00000042750 | 48,99    | -1,46 | 2,26E-05    | 0,000395933 |
| 440 | Sema3e        | ENSMUSG00000063531 | 331,83   | -1,46 | 2,23E-10    | 1,68E-08    |
| 441 | Fmo5          | ENSMUSG00000028088 | 527,87   | -1,46 | 6,57E-06    | 0,000140325 |
| 442 | Gprasp2       | ENSMUSG00000072966 | 9,88     | -1,45 | 0,000337068 | 0,003656675 |
| 443 | 1700003N22Rik | ENSMUSG00000102463 | 28,39    | -1,45 | 2,10E-05    | 0,000374347 |
| 444 | Ces2b         | ENSMUSG00000050097 | 1011,66  | -1,45 | 2,01E-05    | 0,000361637 |
| 445 | Scgn          | ENSMUSG00000021337 | 16,97    | -1,45 | 8,87E-05    | 0,001229023 |
| 446 | Gm38393       | ENSMUSG00000000948 | 38,75    | -1,45 | 4,75E-08    | 1,92E-06    |
| 447 | Dio1          | ENSMUSG00000034785 | 24,68    | -1,45 | 0,000133613 | 0,001726362 |
| 448 | Pi16          | ENSMUSG00000024011 | 29,52    | -1,45 | 0,001670045 | 0,013323805 |
| 449 | Proc          | ENSMUSG00000024386 | 9,41     | -1,44 | 0,000833208 | 0,007709245 |

|     |              |                    |          |       |             |             |
|-----|--------------|--------------------|----------|-------|-------------|-------------|
| 450 | Gm16418      | ENSMUSG00000084093 | 47,55    | -1,44 | 4,77E-06    | 0,000105786 |
| 451 | Sfta2        | ENSMUSG00000090509 | 24,83    | -1,44 | 0,000102523 | 0,001384631 |
| 452 | Phyh         | ENSMUSG00000026664 | 2617,41  | -1,44 | 3,10E-08    | 1,33E-06    |
| 453 | Mettl7b      | ENSMUSG00000025347 | 460,84   | -1,43 | 1,55E-05    | 0,000290143 |
| 454 | Pak3         | ENSMUSG00000031284 | 18,49    | -1,43 | 0,000211056 | 0,002498105 |
| 455 | BC067074     | ENSMUSG00000021763 | 9,83     | -1,43 | 0,000468251 | 0,004810686 |
| 456 | Cfap69       | ENSMUSG00000040473 | 191,50   | -1,43 | 0,001261071 | 0,010705995 |
| 457 | Lrrc10b      | ENSMUSG00000090291 | 47,38    | -1,43 | 2,85E-05    | 0,000476579 |
| 458 | Hsbp11l      | ENSMUSG00000078963 | 13,39    | -1,43 | 0,001626907 | 0,013050024 |
| 459 | Hdc          | ENSMUSG00000027360 | 147,96   | -1,43 | 0,000127417 | 0,001652725 |
| 460 | Tcp11        | ENSMUSG00000062859 | 8,81     | -1,43 | 0,00036282  | 0,003896584 |
| 461 | Aqp3         | ENSMUSG00000028435 | 1706,91  | -1,42 | 7,60E-06    | 0,000158639 |
| 462 | Foxp2        | ENSMUSG00000029563 | 74,61    | -1,42 | 1,45E-05    | 0,000275469 |
| 463 | Ttc30b       | ENSMUSG00000075273 | 146,87   | -1,42 | 2,31E-14    | 4,22E-12    |
| 464 | Runx1t1      | ENSMUSG00000006586 | 58,52    | -1,42 | 7,28E-05    | 0,001053476 |
| 465 | Cyp2c55      | ENSMUSG00000025002 | 4,73     | -1,42 | 0,001672893 | 0,01333615  |
| 466 | Il5ra        | ENSMUSG00000005364 | 146,98   | -1,42 | 2,16E-06    | 5,39E-05    |
| 467 | Fcor         | ENSMUSG00000089665 | 9,63     | -1,42 | 0,002556871 | 0,018739653 |
| 468 | Fkbp11       | ENSMUSG00000003355 | 63,88    | -1,41 | 3,03E-05    | 0,000501112 |
| 469 | Arid4a       | ENSMUSG00000048118 | 604,50   | -1,41 | 2,28E-06    | 5,62E-05    |
| 470 | Mettl1       | ENSMUSG00000006732 | 342,92   | -1,41 | 4,54E-06    | 0,000101283 |
| 471 | Wipf3        | ENSMUSG00000086040 | 18,14    | -1,41 | 0,000752186 | 0,007086381 |
| 472 | Apoa1        | ENSMUSG00000032083 | 1722,85  | -1,41 | 0,002883432 | 0,020664449 |
| 473 | Tmem35       | ENSMUSG00000033578 | 12,34    | -1,41 | 0,001348169 | 0,011248439 |
| 474 | Gsta1        | ENSMUSG00000074183 | 977,36   | -1,41 | 2,70E-06    | 6,51E-05    |
| 475 | Gm15614      | ENSMUSG00000085234 | 8,65     | -1,41 | 0,000139233 | 0,00178687  |
| 476 | Masp2        | ENSMUSG00000028979 | 23,84    | -1,41 | 0,000140533 | 0,001797807 |
| 477 | Cbr3         | ENSMUSG00000022947 | 723,41   | -1,41 | 3,12E-09    | 1,79E-07    |
| 478 | Tespa1       | ENSMUSG00000034833 | 40,75    | -1,41 | 1,28E-05    | 0,000248504 |
| 479 | Acadsb       | ENSMUSG00000030861 | 710,96   | -1,40 | 0,000213337 | 0,002518702 |
| 480 | Lrrc3b       | ENSMUSG00000045201 | 4,48     | -1,40 | 0,002794972 | 0,020104788 |
| 481 | Cobll1       | ENSMUSG00000034903 | 223,70   | -1,40 | 5,86E-06    | 0,000127114 |
| 482 | Gm9790       | ENSMUSG00000044330 | 353,84   | -1,40 | 4,21E-06    | 9,52E-05    |
| 483 | Gm7331       | ENSMUSG00000059461 | 24,53    | -1,40 | 2,24E-05    | 0,000393205 |
| 484 | Arhgef4      | ENSMUSG00000037509 | 107,82   | -1,40 | 1,79E-06    | 4,58E-05    |
| 485 | Gm12099      | ENSMUSG00000083655 | 2,86     | -1,40 | 0,005057258 | 0,032173164 |
| 486 | Rph3al       | ENSMUSG00000020847 | 95,73    | -1,39 | 2,81E-06    | 6,74E-05    |
| 487 | Magi2        | ENSMUSG00000040003 | 58957,59 | -1,39 | 1,63E-06    | 4,22E-05    |
| 488 | Fzd4         | ENSMUSG00000049791 | 299,95   | -1,39 | 1,77E-07    | 6,10E-06    |
| 489 | RP23-382L1.7 | ENSMUSG00000106441 | 6,91     | -1,39 | 0,003133859 | 0,022118564 |
| 490 | Fam181b      | ENSMUSG00000051515 | 2,30     | -1,39 | 0,005388494 | 0,033716124 |
| 491 | Fabp5l2      | ENSMUSG00000094334 | 39,41    | -1,39 | 8,26E-05    | 0,001160177 |
| 492 | Bmp2         | ENSMUSG00000027358 | 409,53   | -1,39 | 3,51E-06    | 8,11E-05    |
| 493 | Ptpru        | ENSMUSG00000028909 | 64,84    | -1,39 | 1,76E-10    | 1,36E-08    |
| 494 | Car4         | ENSMUSG00000000805 | 11,99    | -1,38 | 0,000138641 | 0,001782413 |

|     |               |                    |          |       |             |             |
|-----|---------------|--------------------|----------|-------|-------------|-------------|
| 495 | 4933402N03Rik | ENSMUSG00000013668 | 2,95     | -1,38 | 0,005981719 | 0,036474672 |
| 496 | Mgp           | ENSMUSG00000030218 | 150,57   | -1,38 | 0,000237843 | 0,002739908 |
| 497 | Retnla        | ENSMUSG00000061100 | 45,13    | -1,38 | 0,005960851 | 0,036368377 |
| 498 | Lmo4          | ENSMUSG00000028266 | 1085,29  | -1,38 | 8,81E-08    | 3,28E-06    |
| 499 | Apol6         | ENSMUSG00000033576 | 25,80    | -1,38 | 0,000197858 | 0,002368395 |
| 500 | Diras2        | ENSMUSG00000047842 | 28,51    | -1,38 | 9,43E-05    | 0,001291616 |
| 501 | Herc3         | ENSMUSG00000029804 | 227,98   | -1,37 | 4,26E-07    | 1,33E-05    |
| 502 | Etnppl        | ENSMUSG00000019232 | 15,27    | -1,37 | 0,002566857 | 0,018795082 |
| 503 | Rdh16         | ENSMUSG00000069456 | 59,08    | -1,37 | 4,29E-05    | 0,000670262 |
| 504 | Pcdh9         | ENSMUSG00000055421 | 16,45    | -1,37 | 0,006310372 | 0,038054209 |
| 505 | Gsto2         | ENSMUSG00000025069 | 35,81    | -1,37 | 3,11E-05    | 0,000511403 |
| 506 | Smim24        | ENSMUSG00000078439 | 2404,38  | -1,37 | 6,45E-06    | 0,000138055 |
| 507 | Tsnaxip1      | ENSMUSG00000031893 | 64,89    | -1,37 | 4,00E-12    | 4,41E-10    |
| 508 | Klhdc8a       | ENSMUSG00000042115 | 5,21     | -1,36 | 0,00234944  | 0,017635767 |
| 509 | 2210407C18Rik | ENSMUSG00000037145 | 15851,30 | -1,36 | 1,91E-07    | 6,51E-06    |
| 510 | Foxa3         | ENSMUSG00000040891 | 1058,25  | -1,36 | 3,32E-17    | 1,10E-14    |
| 511 | Slc7a14       | ENSMUSG00000069072 | 22,56    | -1,36 | 1,48E-05    | 0,000280184 |
| 512 | Hpx           | ENSMUSG00000030895 | 17,23    | -1,36 | 0,002204157 | 0,016712525 |
| 513 | Pla2g10os     | ENSMUSG00000086550 | 51,41    | -1,36 | 2,13E-05    | 0,000379035 |
| 514 | Jph4          | ENSMUSG00000022208 | 3,86     | -1,36 | 0,002676339 | 0,019419523 |
| 515 | Gm13557       | ENSMUSG00000082989 | 49,99    | -1,36 | 2,80E-06    | 6,73E-05    |
| 516 | Slc9a3r2      | ENSMUSG00000002504 | 218,07   | -1,36 | 4,16E-09    | 2,28E-07    |
| 517 | Lppr4         | ENSMUSG00000044667 | 7,83     | -1,36 | 0,00266063  | 0,019312437 |
| 518 | Klf15         | ENSMUSG00000030087 | 38,13    | -1,35 | 0,000236352 | 0,002732201 |
| 519 | Sytl2         | ENSMUSG00000030616 | 2805,35  | -1,35 | 4,35E-08    | 1,77E-06    |
| 520 | Camsap3       | ENSMUSG00000044433 | 334,59   | -1,35 | 7,38E-06    | 0,000155054 |
| 521 | Sectm1b       | ENSMUSG00000039364 | 881,83   | -1,35 | 5,26E-06    | 0,000115674 |
| 522 | Magix         | ENSMUSG00000031147 | 13,80    | -1,35 | 0,001619422 | 0,013003433 |
| 523 | Cdh22         | ENSMUSG00000053166 | 2,63     | -1,35 | 0,005465237 | 0,034040702 |
| 524 | Epb4.1l4a     | ENSMUSG00000024376 | 59,90    | -1,35 | 8,63E-06    | 0,000177292 |
| 525 | Trak1         | ENSMUSG00000032536 | 996,12   | -1,34 | 2,29E-13    | 3,33E-11    |
| 526 | Bckdhb        | ENSMUSG00000032263 | 176,59   | -1,34 | 4,02E-05    | 0,000634641 |
| 527 | RP24-253A20.1 | ENSMUSG00000105771 | 11,00    | -1,34 | 0,004751751 | 0,030629706 |
| 528 | Sult1b1       | ENSMUSG00000029269 | 1753,58  | -1,34 | 1,82E-07    | 6,23E-06    |
| 529 | RP23-140B23.1 | ENSMUSG00000105983 | 5,12     | -1,34 | 0,006978627 | 0,041153739 |
| 530 | Gm10039       | ENSMUSG00000091478 | 595,55   | -1,34 | 7,41E-10    | 4,90E-08    |
| 531 | Gm10083       | ENSMUSG00000060559 | 1,55     | -1,34 | 0,007128023 | 0,041801689 |
| 532 | Fam117a       | ENSMUSG00000038893 | 57,70    | -1,34 | 8,94E-06    | 0,000182819 |
| 533 | Sgpp1         | ENSMUSG00000021054 | 615,05   | -1,34 | 1,45E-08    | 7,01E-07    |
| 534 | Fbxo16        | ENSMUSG00000034532 | 7,06     | -1,34 | 0,002171317 | 0,016528145 |
| 535 | 1700030A11Rik | ENSMUSG00000085333 | 5,14     | -1,34 | 0,005920743 | 0,036228157 |
| 536 | Ermp1         | ENSMUSG00000046324 | 2071,60  | -1,34 | 3,12E-10    | 2,26E-08    |
| 537 | A330033J07Rik | ENSMUSG00000097622 | 2,10     | -1,33 | 0,007262387 | 0,042407967 |
| 538 | Ptgfr         | ENSMUSG00000028036 | 12,89    | -1,33 | 0,004504393 | 0,029385262 |
| 539 | 2410141K09Rik | ENSMUSG00000074832 | 5,11     | -1,33 | 0,004830419 | 0,031014138 |



|     |              |                    |         |       |             |             |
|-----|--------------|--------------------|---------|-------|-------------|-------------|
| 540 | Kcnn3        | ENSMUSG00000000794 | 92,99   | -1,33 | 2,43E-07    | 8,07E-06    |
| 541 | Asxl3        | ENSMUSG00000045215 | 1,64    | -1,33 | 0,008229342 | 0,046648405 |
| 542 | Gm13053      | ENSMUSG00000085574 | 19,51   | -1,33 | 0,000395203 | 0,004180168 |
| 543 | Edn3         | ENSMUSG00000027524 | 71,89   | -1,33 | 8,21E-05    | 0,00115405  |
| 544 | Slc26a9      | ENSMUSG00000042268 | 1201,25 | -1,32 | 0,000296363 | 0,003294251 |
| 545 | Psm3         | ENSMUSG00000060073 | 254,47  | -1,32 | 5,78E-06    | 0,000125549 |
| 546 | Arhgef37     | ENSMUSG00000045094 | 49,66   | -1,32 | 0,000106393 | 0,001429429 |
| 547 | Fam46c       | ENSMUSG00000044468 | 222,54  | -1,32 | 0,000109581 | 0,001467173 |
| 548 | Slc35g1      | ENSMUSG00000044026 | 1180,86 | -1,32 | 1,57E-07    | 5,47E-06    |
| 549 | Gm14767      | ENSMUSG00000081933 | 2,52    | -1,32 | 0,008245937 | 0,046675491 |
| 550 | Perm1        | ENSMUSG00000078486 | 28,86   | -1,32 | 0,002982537 | 0,021224355 |
| 551 | Gm24727      | ENSMUSG00000088856 | 472,36  | -1,32 | 1,83E-05    | 0,00033181  |
| 552 | RP23-477N9.2 | ENSMUSG00000104917 | 6,71    | -1,32 | 0,001887123 | 0,0147956   |
| 553 | Slc2a5       | ENSMUSG00000028976 | 27,16   | -1,32 | 0,000113456 | 0,001510364 |
| 554 | Dlx1         | ENSMUSG00000041911 | 2,98    | -1,32 | 0,008744995 | 0,048811713 |
| 555 | Sstr3        | ENSMUSG00000044933 | 4,43    | -1,31 | 0,007516499 | 0,043498861 |
| 556 | Gldc         | ENSMUSG00000024827 | 395,54  | -1,31 | 7,52E-06    | 0,000157253 |
| 557 | Vstm5        | ENSMUSG00000031937 | 495,55  | -1,31 | 4,02E-06    | 9,12E-05    |
| 558 | Asb13        | ENSMUSG00000033781 | 431,35  | -1,31 | 2,89E-16    | 7,72E-14    |
| 559 | Efhd1        | ENSMUSG00000026255 | 4,26    | -1,31 | 0,003750104 | 0,025538464 |
| 560 | Igfals       | ENSMUSG00000046070 | 4,51    | -1,31 | 0,006871719 | 0,040625461 |
| 561 | Kcne1        | ENSMUSG00000039639 | 93,34   | -1,31 | 0,002871714 | 0,02058897  |
| 562 | Dpt          | ENSMUSG00000026574 | 1298,37 | -1,31 | 5,79E-08    | 2,28E-06    |
| 563 | Ddit4l       | ENSMUSG00000046818 | 19,15   | -1,31 | 2,23E-05    | 0,000390805 |
| 564 | Osbp1a       | ENSMUSG00000044252 | 150,05  | -1,31 | 0,00022338  | 0,002609477 |
| 565 | Smad9        | ENSMUSG00000027796 | 76,78   | -1,31 | 4,98E-05    | 0,000761656 |
| 566 | Ugdh         | ENSMUSG00000029201 | 3480,96 | -1,31 | 2,21E-10    | 1,67E-08    |
| 567 | Slco2a1      | ENSMUSG00000032548 | 1483,06 | -1,31 | 9,13E-05    | 0,001256951 |
| 568 | Gm10221      | ENSMUSG00000067719 | 52,26   | -1,31 | 3,61E-05    | 0,000579102 |
| 569 | Tgm4         | ENSMUSG00000025787 | 30,06   | -1,31 | 0,000494614 | 0,005045185 |
| 570 | Fam19a2      | ENSMUSG00000044071 | 17,42   | -1,31 | 6,84E-05    | 0,0009989   |
| 571 | Gm15318      | ENSMUSG00000086010 | 434,51  | -1,30 | 2,12E-05    | 0,000377987 |
| 572 | Pla2g12a     | ENSMUSG00000027999 | 352,07  | -1,30 | 1,79E-14    | 3,42E-12    |
| 573 | Mrps36-ps2   | ENSMUSG00000081911 | 2,47    | -1,30 | 0,006860395 | 0,04057887  |
| 574 | Gm2962       | ENSMUSG00000089838 | 350,35  | -1,30 | 2,34E-09    | 1,38E-07    |
| 575 | RP23-3L20.5  | ENSMUSG00000105960 | 6,54    | -1,30 | 0,002014902 | 0,01558736  |
| 576 | Gm24514      | ENSMUSG00000092702 | 3,18    | -1,30 | 0,006270852 | 0,037852849 |
| 577 | Tsc22d3      | ENSMUSG00000031431 | 427,41  | -1,30 | 4,11E-08    | 1,69E-06    |
| 578 | Spp2         | ENSMUSG00000026295 | 68,57   | -1,30 | 0,000315234 | 0,003456    |
| 579 | Ezr          | ENSMUSG00000052397 | 4734,63 | -1,30 | 2,11E-14    | 3,93E-12    |
| 580 | Mesp2        | ENSMUSG00000030543 | 2,75    | -1,29 | 0,008502101 | 0,047753778 |
| 581 | Ccrn4l       | ENSMUSG00000023087 | 157,96  | -1,29 | 6,01E-08    | 2,34E-06    |
| 582 | Gm7901       | ENSMUSG00000101431 | 5,75    | -1,29 | 0,003972344 | 0,02672346  |
| 583 | Gm13594      | ENSMUSG00000086881 | 2,50    | -1,29 | 0,008840656 | 0,049239362 |
| 584 | Lysmd1       | ENSMUSG00000053769 | 69,36   | -1,29 | 1,95E-06    | 4,95E-05    |

|     |               |                    |         |       |             |             |
|-----|---------------|--------------------|---------|-------|-------------|-------------|
| 585 | Gm10767       | ENSMUSG00000074826 | 32,94   | -1,29 | 1,29E-06    | 3,43E-05    |
| 586 | Ndufa4        | ENSMUSG00000029632 | 2548,99 | -1,29 | 2,63E-06    | 6,37E-05    |
| 587 | Pla2g4c       | ENSMUSG00000033847 | 220,95  | -1,29 | 0,005822808 | 0,035741687 |
| 588 | Gm37618       | ENSMUSG00000102714 | 12,75   | -1,29 | 0,000662379 | 0,006400976 |
| 589 | 2200002J24Rik | ENSMUSG00000013083 | 22,44   | -1,29 | 0,008529057 | 0,047870514 |
| 590 | Cobl          | ENSMUSG00000020173 | 167,28  | -1,29 | 0,005486223 | 0,034113406 |
| 591 | Scg3          | ENSMUSG00000032181 | 34,81   | -1,29 | 4,69E-05    | 0,000722608 |
| 592 | Gm17546       | ENSMUSG00000078648 | 10,75   | -1,29 | 0,000434703 | 0,004511403 |
| 593 | Aldh1l2       | ENSMUSG00000020256 | 102,68  | -1,29 | 0,000134774 | 0,001738461 |
| 594 | Gm572         | ENSMUSG00000070577 | 25,35   | -1,28 | 0,000682664 | 0,006562279 |
| 595 | Galk1         | ENSMUSG00000020766 | 94,61   | -1,28 | 8,57E-11    | 7,26E-09    |
| 596 | E130012A19Rik | ENSMUSG00000043439 | 110,77  | -1,28 | 9,38E-05    | 0,001285559 |
| 597 | Rbm20         | ENSMUSG00000043639 | 118,71  | -1,28 | 5,88E-06    | 0,000127437 |
| 598 | Gsta2         | ENSMUSG00000057933 | 173,82  | -1,28 | 7,84E-07    | 2,25E-05    |
| 599 | Celrr         | ENSMUSG00000097881 | 33,54   | -1,28 | 5,23E-08    | 2,08E-06    |
| 600 | 4933406K04Rik | ENSMUSG00000085820 | 10,13   | -1,28 | 0,004303411 | 0,028428787 |
| 601 | Gmpr          | ENSMUSG00000000253 | 34,48   | -1,28 | 0,001214213 | 0,010380137 |
| 602 | Snta1         | ENSMUSG00000027488 | 42,66   | -1,28 | 2,78E-05    | 0,000468103 |
| 603 | Kcnk5         | ENSMUSG00000023243 | 344,22  | -1,28 | 1,59E-08    | 7,52E-07    |
| 604 | Rhou          | ENSMUSG00000039960 | 702,75  | -1,28 | 2,07E-12    | 2,53E-10    |
| 605 | Fam57b        | ENSMUSG00000058966 | 3,11    | -1,28 | 0,007136951 | 0,041832958 |
| 606 | Nr2f2         | ENSMUSG00000030551 | 325,45  | -1,28 | 2,92E-05    | 0,000487403 |
| 607 | 4932431P20Rik | ENSMUSG00000074224 | 14,73   | -1,27 | 0,000200778 | 0,002395947 |
| 608 | Kcnma1        | ENSMUSG00000063142 | 17,91   | -1,27 | 0,003609689 | 0,024807284 |
| 609 | Gm15417       | ENSMUSG00000074466 | 74,48   | -1,27 | 5,65E-07    | 1,70E-05    |
| 610 | Slit1         | ENSMUSG00000025020 | 7,55    | -1,27 | 0,004989678 | 0,031793483 |
| 611 | Wnt9a         | ENSMUSG00000000126 | 11,18   | -1,27 | 0,002465376 | 0,01828795  |
| 612 | Nipal1        | ENSMUSG00000067219 | 581,19  | -1,27 | 2,24E-06    | 5,55E-05    |
| 613 | 2010103J01Rik | ENSMUSG00000104368 | 13,55   | -1,27 | 0,00153351  | 0,012438052 |
| 614 | Rnf128        | ENSMUSG00000031438 | 5048,73 | -1,27 | 8,81E-10    | 5,76E-08    |
| 615 | Ccbl2         | ENSMUSG00000040213 | 148,63  | -1,27 | 1,60E-05    | 0,000297257 |
| 616 | B230323A14Rik | ENSMUSG00000097623 | 16,88   | -1,27 | 0,002736475 | 0,019763427 |
| 617 | 1700110K17Rik | ENSMUSG00000087047 | 67,80   | -1,27 | 0,000278335 | 0,003130431 |
| 618 | Nfkbid        | ENSMUSG00000036931 | 59,19   | -1,27 | 8,13E-07    | 2,33E-05    |
| 619 | Rpl36-ps2     | ENSMUSG00000024205 | 2,84    | -1,27 | 0,007862104 | 0,045128556 |
| 620 | S100a2        | ENSMUSG00000094018 | 15,05   | -1,27 | 0,001525289 | 0,012410149 |
| 621 | Me3           | ENSMUSG00000030621 | 97,55   | -1,26 | 6,21E-05    | 0,000920174 |
| 622 | Cfap126       | ENSMUSG00000026649 | 27,99   | -1,26 | 2,55E-05    | 0,000434491 |
| 623 | Synpr         | ENSMUSG00000056296 | 3,60    | -1,26 | 0,00798722  | 0,045700174 |
| 624 | Tppp          | ENSMUSG00000021573 | 366,21  | -1,26 | 4,62E-07    | 1,42E-05    |
| 625 | St18          | ENSMUSG00000033740 | 73,34   | -1,26 | 2,84E-05    | 0,000474851 |
| 626 | RP24-76K4.1   | ENSMUSG00000105163 | 8,98    | -1,26 | 0,00065976  | 0,006378321 |
| 627 | Scarna13      | ENSMUSG00000088789 | 2392,18 | -1,26 | 0,000373809 | 0,003990156 |
| 628 | Plgrkt        | ENSMUSG00000016495 | 529,26  | -1,26 | 4,18E-09    | 2,29E-07    |
| 629 | Capn6         | ENSMUSG00000067276 | 154,22  | -1,26 | 0,000309407 | 0,003405824 |

|     |          |                    |          |       |             |             |
|-----|----------|--------------------|----------|-------|-------------|-------------|
| 630 | Gm37339  | ENSMUSG00000103415 | 3,76     | -1,26 | 0,007846472 | 0,045071615 |
| 631 | Gm13904  | ENSMUSG00000082066 | 23,15    | -1,25 | 0,000945903 | 0,00851496  |
| 632 | Mgll     | ENSMUSG00000033174 | 945,42   | -1,25 | 8,43E-08    | 3,16E-06    |
| 633 | Dpcr1    | ENSMUSG00000073408 | 36638,94 | -1,25 | 3,22E-05    | 0,000525247 |
| 634 | Gsto1    | ENSMUSG00000025068 | 15147,35 | -1,25 | 2,97E-06    | 7,07E-05    |
| 635 | Slc29a4  | ENSMUSG00000050822 | 4,52     | -1,25 | 0,008225476 | 0,046648405 |
| 636 | Cyp2j12  | ENSMUSG00000081225 | 6,18     | -1,25 | 0,001995209 | 0,015471013 |
| 637 | Aplp1    | ENSMUSG00000006651 | 534,03   | -1,25 | 2,97E-12    | 3,48E-10    |
| 638 | Tmem161b | ENSMUSG00000035762 | 337,22   | -1,25 | 1,98E-06    | 5,00E-05    |
| 639 | Tmem45a2 | ENSMUSG00000046748 | 10,95    | -1,25 | 0,003924669 | 0,026471606 |
| 640 | Mt1      | ENSMUSG00000031765 | 1498,75  | -1,24 | 0,000157558 | 0,00195436  |
| 641 | Itgb2l   | ENSMUSG00000000157 | 106,84   | -1,24 | 7,64E-05    | 0,00109435  |
| 642 | Fndc5    | ENSMUSG00000001334 | 13,32    | -1,24 | 0,004217838 | 0,027989273 |
| 643 | Slc18a2  | ENSMUSG00000025094 | 88,90    | -1,24 | 0,000423934 | 0,004427708 |
| 644 | Rnf225   | ENSMUSG00000033967 | 39,37    | -1,24 | 0,000121779 | 0,00159381  |
| 645 | Gm12580  | ENSMUSG00000086470 | 8,82     | -1,24 | 0,002504072 | 0,018499078 |
| 646 | Tstd1    | ENSMUSG00000103711 | 211,70   | -1,24 | 1,13E-05    | 0,00022195  |
| 647 | Ndufb6   | ENSMUSG00000071014 | 247,67   | -1,24 | 2,73E-06    | 6,57E-05    |
| 648 | Dtna     | ENSMUSG00000024302 | 140,62   | -1,24 | 0,000823652 | 0,007632967 |
| 649 | Dhrs9    | ENSMUSG00000027068 | 883,22   | -1,24 | 0,000467071 | 0,004807047 |
| 650 | Sep.06   | ENSMUSG00000050379 | 63,35    | -1,23 | 0,003160799 | 0,022247972 |
| 651 | Gm26674  | ENSMUSG00000097597 | 9,31     | -1,23 | 0,001255533 | 0,010662866 |
| 652 | Rsg1     | ENSMUSG00000073733 | 28,80    | -1,23 | 3,67E-05    | 0,000586339 |
| 653 | Grhpr    | ENSMUSG00000035637 | 82,73    | -1,23 | 0,000122395 | 0,001600074 |
| 654 | Cmss1    | ENSMUSG00000022748 | 22,90    | -1,23 | 0,000634915 | 0,006172123 |
| 655 | Ptgis    | ENSMUSG00000017969 | 20,29    | -1,22 | 0,000129565 | 0,00167685  |
| 656 | Rimbp2   | ENSMUSG00000029420 | 30,02    | -1,22 | 0,00159788  | 0,012883806 |
| 657 | Myzap    | ENSMUSG00000041361 | 80,90    | -1,22 | 1,51E-08    | 7,24E-07    |
| 658 | Sowaha   | ENSMUSG00000044352 | 38,84    | -1,22 | 9,02E-09    | 4,56E-07    |
| 659 | Ttc30a2  | ENSMUSG00000075272 | 5,09     | -1,22 | 0,008736828 | 0,048789532 |
| 660 | Sohlh1   | ENSMUSG00000059625 | 6,04     | -1,22 | 0,004623523 | 0,030006415 |
| 661 | Tpsb2    | ENSMUSG00000033825 | 40,76    | -1,22 | 0,001275158 | 0,010778397 |
| 662 | Cd59b    | ENSMUSG00000068686 | 70,20    | -1,22 | 6,78E-08    | 2,60E-06    |
| 663 | Gm37985  | ENSMUSG00000104211 | 12,81    | -1,22 | 0,004714789 | 0,030442051 |
| 664 | Il18     | ENSMUSG00000039217 | 1663,42  | -1,22 | 2,47E-05    | 0,000422949 |
| 665 | Dbn1     | ENSMUSG00000034675 | 46,29    | -1,22 | 0,000463308 | 0,004776769 |
| 666 | Gm24530  | ENSMUSG00000088573 | 4,70     | -1,21 | 0,006093672 | 0,037023433 |
| 667 | Sntg2    | ENSMUSG00000020672 | 61,22    | -1,21 | 8,23E-07    | 2,35E-05    |
| 668 | Mirg     | ENSMUSG00000097391 | 16,57    | -1,21 | 3,10E-05    | 0,000510336 |
| 669 | Gm14095  | ENSMUSG00000086250 | 94,99    | -1,21 | 0,000871638 | 0,007998035 |
| 670 | Gm38315  | ENSMUSG00000103732 | 5,57     | -1,21 | 0,004811011 | 0,030926906 |
| 671 | Bglap3   | ENSMUSG00000074489 | 859,72   | -1,21 | 0,0011523   | 0,010001384 |
| 672 | Kcnj13   | ENSMUSG00000079436 | 11,93    | -1,21 | 0,000893246 | 0,008138544 |
| 673 | Hsd17b2  | ENSMUSG00000031844 | 422,60   | -1,21 | 2,23E-06    | 5,53E-05    |
| 674 | Tmem97   | ENSMUSG00000037278 | 151,66   | -1,21 | 1,13E-05    | 0,00022195  |

|     |               |                    |         |       |             |             |
|-----|---------------|--------------------|---------|-------|-------------|-------------|
| 675 | Syt1          | ENSMUSG00000028860 | 302,14  | -1,21 | 2,22E-09    | 1,31E-07    |
| 676 | Ugt2a3        | ENSMUSG00000035780 | 35,79   | -1,21 | 0,000120049 | 0,001573829 |
| 677 | Tpmt          | ENSMUSG00000021376 | 340,11  | -1,20 | 3,44E-06    | 8,02E-05    |
| 678 | Dusp5         | ENSMUSG00000034765 | 195,14  | -1,20 | 0,002026693 | 0,015647358 |
| 679 | Rap1gapos     | ENSMUSG00000087476 | 46,38   | -1,20 | 5,76E-05    | 0,000862111 |
| 680 | Gm38305       | ENSMUSG00000103396 | 154,56  | -1,20 | 1,16E-05    | 0,000228172 |
| 681 | Atg7          | ENSMUSG00000030314 | 1236,39 | -1,20 | 3,19E-08    | 1,37E-06    |
| 682 | Galr1         | ENSMUSG00000024553 | 14,01   | -1,20 | 0,003523469 | 0,024329707 |
| 683 | Gm29538       | ENSMUSG00000099553 | 17,78   | -1,20 | 0,004312697 | 0,028469178 |
| 684 | Vars2         | ENSMUSG00000038838 | 222,40  | -1,20 | 1,06E-05    | 0,000210644 |
| 685 | G6b           | ENSMUSG00000073414 | 8,78    | -1,19 | 0,000653462 | 0,006330584 |
| 686 | Oit1          | ENSMUSG00000021749 | 1468,63 | -1,19 | 9,68E-09    | 4,84E-07    |
| 687 | Gde1          | ENSMUSG00000033917 | 753,02  | -1,19 | 5,65E-08    | 2,22E-06    |
| 688 | Msrb2         | ENSMUSG00000023094 | 37,47   | -1,19 | 6,12E-05    | 0,000908943 |
| 689 | Lypd6b        | ENSMUSG00000026765 | 749,52  | -1,19 | 8,93E-09    | 4,53E-07    |
| 690 | Mtmr7         | ENSMUSG00000039431 | 84,42   | -1,19 | 5,44E-05    | 0,000817276 |
| 691 | D630033O11Rik | ENSMUSG00000095385 | 10,56   | -1,19 | 0,005258499 | 0,033188304 |
| 692 | Krt23         | ENSMUSG00000006777 | 703,19  | -1,19 | 1,41E-16    | 4,17E-14    |
| 693 | Hsd17b3       | ENSMUSG00000033122 | 6,79    | -1,19 | 0,003510012 | 0,02425118  |
| 694 | RP23-461P7.1  | ENSMUSG00000104969 | 21,62   | -1,19 | 0,000633295 | 0,006166018 |
| 695 | Fign          | ENSMUSG00000075324 | 13,58   | -1,18 | 0,004358285 | 0,028702381 |
| 696 | D930020B18Rik | ENSMUSG00000047642 | 16,60   | -1,18 | 0,000741186 | 0,007008293 |
| 697 | Iqsec3        | ENSMUSG00000040797 | 1129,51 | -1,18 | 1,09E-06    | 2,98E-05    |
| 698 | Dcaf12l1      | ENSMUSG00000045284 | 9,41    | -1,18 | 0,001197281 | 0,010273133 |
| 699 | Clec3b        | ENSMUSG00000025784 | 49,64   | -1,18 | 0,000157093 | 0,001950675 |
| 700 | Cbr1          | ENSMUSG00000051483 | 1510,10 | -1,18 | 9,93E-13    | 1,32E-10    |
| 701 | Mt2           | ENSMUSG00000031762 | 1679,61 | -1,18 | 0,000758213 | 0,007131617 |
| 702 | Neurod4       | ENSMUSG00000048015 | 12,42   | -1,18 | 0,00432746  | 0,028551175 |
| 703 | Id4           | ENSMUSG00000021379 | 68,16   | -1,18 | 2,55E-07    | 8,37E-06    |
| 704 | Cth           | ENSMUSG00000028179 | 88,29   | -1,17 | 4,73E-05    | 0,000727761 |
| 705 | Map3k15       | ENSMUSG00000031303 | 22,89   | -1,17 | 0,001837479 | 0,014459968 |
| 706 | Fam109a       | ENSMUSG00000044134 | 312,41  | -1,17 | 3,04E-12    | 3,52E-10    |
| 707 | Kank1         | ENSMUSG00000032702 | 191,69  | -1,17 | 0,002591447 | 0,018951283 |
| 708 | Gsn           | ENSMUSG00000026879 | 5119,94 | -1,17 | 2,05E-08    | 9,36E-07    |
| 709 | Gadd45b       | ENSMUSG00000015312 | 172,20  | -1,17 | 1,24E-05    | 0,000241378 |
| 710 | Clip1         | ENSMUSG00000049550 | 1187,90 | -1,16 | 1,88E-12    | 2,31E-10    |
| 711 | Cpvl          | ENSMUSG00000052955 | 31,72   | -1,16 | 0,000289029 | 0,00323041  |
| 712 | Ifi27         | ENSMUSG00000064215 | 285,50  | -1,16 | 0,002455087 | 0,018234971 |
| 713 | Casq2         | ENSMUSG00000027861 | 44,36   | -1,16 | 0,000147121 | 0,001858575 |
| 714 | Cat           | ENSMUSG00000027187 | 900,29  | -1,16 | 5,85E-07    | 1,75E-05    |
| 715 | Atp5h         | ENSMUSG00000034566 | 1325,97 | -1,16 | 1,27E-09    | 7,92E-08    |
| 716 | Mal           | ENSMUSG00000027375 | 8773,95 | -1,16 | 1,29E-05    | 0,000249117 |
| 717 | Ntn4          | ENSMUSG00000020019 | 266,25  | -1,16 | 3,05E-08    | 1,32E-06    |
| 718 | RP23-304A10.2 | ENSMUSG00000106139 | 11,70   | -1,16 | 0,000578368 | 0,005729509 |
| 719 | Gm12389       | ENSMUSG00000081352 | 184,83  | -1,16 | 1,60E-06    | 4,15E-05    |

|     |               |                    |         |       |             |             |
|-----|---------------|--------------------|---------|-------|-------------|-------------|
| 720 | Tinag         | ENSMUSG00000032357 | 161,72  | -1,16 | 0,00034615  | 0,003746472 |
| 721 | Hmcn2         | ENSMUSG00000055632 | 157,14  | -1,15 | 2,29E-05    | 0,000399145 |
| 722 | Asns          | ENSMUSG00000029752 | 724,53  | -1,15 | 2,34E-08    | 1,04E-06    |
| 723 | Asrgl1        | ENSMUSG00000024654 | 41,54   | -1,15 | 1,84E-05    | 0,000334512 |
| 724 | Sectm1a       | ENSMUSG00000025165 | 59,42   | -1,15 | 8,63E-05    | 0,001202127 |
| 725 | RP24-510G5.6  | ENSMUSG00000106939 | 34,57   | -1,15 | 0,000418636 | 0,004382211 |
| 726 | Flrt2         | ENSMUSG00000047414 | 55,30   | -1,15 | 4,36E-05    | 0,000678927 |
| 727 | Necab1        | ENSMUSG00000040536 | 22,87   | -1,15 | 0,008145398 | 0,046339605 |
| 728 | Gm26532       | ENSMUSG00000097296 | 97,09   | -1,15 | 0,000156382 | 0,001944955 |
| 729 | Prim2         | ENSMUSG00000026134 | 354,56  | -1,15 | 9,70E-08    | 3,54E-06    |
| 730 | Trnt1         | ENSMUSG00000013736 | 983,86  | -1,15 | 9,61E-06    | 0,00019404  |
| 731 | Zfp385b       | ENSMUSG00000027016 | 192,47  | -1,15 | 7,34E-08    | 2,80E-06    |
| 732 | Grhl1         | ENSMUSG00000020656 | 206,67  | -1,15 | 2,32E-08    | 1,03E-06    |
| 733 | Cbln3         | ENSMUSG00000040380 | 11,24   | -1,15 | 0,001954768 | 0,015215125 |
| 734 | Dopey2        | ENSMUSG00000022946 | 691,06  | -1,15 | 4,68E-05    | 0,000720787 |
| 735 | Crip1         | ENSMUSG00000006360 | 7425,41 | -1,14 | 0,000307798 | 0,003391311 |
| 736 | Acox1         | ENSMUSG00000020777 | 7619,53 | -1,14 | 2,30E-12    | 2,81E-10    |
| 737 | Slc47a1       | ENSMUSG00000010122 | 30,68   | -1,14 | 1,54E-06    | 4,03E-05    |
| 738 | Ttn           | ENSMUSG00000051747 | 1075,75 | -1,14 | 0,000718517 | 0,006862479 |
| 739 | Itpka         | ENSMUSG00000027296 | 119,98  | -1,14 | 8,77E-07    | 2,48E-05    |
| 740 | Pqlc1         | ENSMUSG00000034006 | 500,28  | -1,14 | 1,09E-12    | 1,41E-10    |
| 741 | Kndc1         | ENSMUSG00000066129 | 125,36  | -1,14 | 2,33E-08    | 1,03E-06    |
| 742 | Retsat        | ENSMUSG00000056666 | 857,28  | -1,14 | 9,75E-11    | 8,16E-09    |
| 743 | Pipox         | ENSMUSG00000017453 | 7,03    | -1,14 | 0,006447317 | 0,038723092 |
| 744 | Arnt2         | ENSMUSG00000015709 | 37,07   | -1,14 | 0,002363039 | 0,017692378 |
| 745 | 9130204K15Rik | ENSMUSG00000086474 | 114,99  | -1,14 | 0,00216605  | 0,016503849 |
| 746 | Ethe1         | ENSMUSG00000064254 | 816,73  | -1,13 | 8,96E-07    | 2,52E-05    |
| 747 | Ric3          | ENSMUSG00000048330 | 37,37   | -1,13 | 0,001273981 | 0,010776078 |
| 748 | Gm24019       | ENSMUSG00000095023 | 9,84    | -1,13 | 0,001685476 | 0,013422665 |
| 749 | Slc6a1        | ENSMUSG00000030310 | 36,60   | -1,13 | 1,02E-05    | 0,000204869 |
| 750 | Ephx2         | ENSMUSG00000022040 | 607,90  | -1,13 | 2,62E-07    | 8,54E-06    |
| 751 | RP23-121M13.3 | ENSMUSG00000104877 | 6,30    | -1,13 | 0,007886093 | 0,045237231 |
| 752 | Adk           | ENSMUSG00000039197 | 204,95  | -1,13 | 5,12E-05    | 0,000779963 |
| 753 | 6330403K07Rik | ENSMUSG00000018451 | 9,33    | -1,13 | 0,004601106 | 0,029907188 |
| 754 | Mup13         | ENSMUSG00000089873 | 8,05    | -1,13 | 0,003821192 | 0,025939071 |
| 755 | Alad          | ENSMUSG00000028393 | 540,71  | -1,13 | 3,37E-09    | 1,92E-07    |
| 756 | Gm15967       | ENSMUSG00000083160 | 6,89    | -1,13 | 0,004115477 | 0,027480841 |
| 757 | Ssx2ip        | ENSMUSG00000036825 | 183,61  | -1,13 | 2,08E-05    | 0,00037173  |
| 758 | Hipk2         | ENSMUSG00000061436 | 620,41  | -1,13 | 8,03E-05    | 0,001132947 |
| 759 | Vegfb         | ENSMUSG00000024962 | 69,77   | -1,13 | 0,000530844 | 0,00534288  |
| 760 | BB365896      | ENSMUSG00000092323 | 8,84    | -1,13 | 0,0068566   | 0,040578096 |
| 761 | 9130230N09Rik | ENSMUSG00000092626 | 6,75    | -1,13 | 0,006378738 | 0,038378866 |
| 762 | Atn1          | ENSMUSG00000004263 | 193,72  | -1,13 | 1,70E-05    | 0,000312528 |
| 763 | Lrrn4cl       | ENSMUSG00000071656 | 8,35    | -1,13 | 0,003535736 | 0,024399935 |
| 764 | Prom2         | ENSMUSG00000027376 | 941,93  | -1,13 | 5,69E-05    | 0,000852874 |

|     |               |                    |         |       |             |             |
|-----|---------------|--------------------|---------|-------|-------------|-------------|
| 765 | Erlin1        | ENSMUSG00000025198 | 664,80  | -1,13 | 1,08E-12    | 1,41E-10    |
| 766 | Fkbp5         | ENSMUSG00000024222 | 87,60   | -1,12 | 0,005729089 | 0,035306116 |
| 767 | Lsamp         | ENSMUSG00000061080 | 6,82    | -1,12 | 0,005639123 | 0,034848776 |
| 768 | Gm14630       | ENSMUSG00000081100 | 10,06   | -1,12 | 0,008487785 | 0,047707911 |
| 769 | Tmem51        | ENSMUSG00000040616 | 591,52  | -1,12 | 6,84E-14    | 1,13E-11    |
| 770 | Tmx4          | ENSMUSG00000034723 | 461,14  | -1,12 | 6,31E-08    | 2,45E-06    |
| 771 | Mrgprb1       | ENSMUSG00000070547 | 10,16   | -1,12 | 0,007308419 | 0,042580599 |
| 772 | Arl14         | ENSMUSG00000098207 | 1054,06 | -1,11 | 1,59E-05    | 0,000295216 |
| 773 | Slco4a1       | ENSMUSG00000038963 | 161,26  | -1,11 | 1,15E-10    | 9,29E-09    |
| 774 | Nceh1         | ENSMUSG00000027698 | 1053,92 | -1,11 | 1,18E-08    | 5,78E-07    |
| 775 | Ifi30         | ENSMUSG00000031838 | 2047,91 | -1,11 | 7,56E-13    | 1,02E-10    |
| 776 | Nkx2-9        | ENSMUSG00000058669 | 5,13    | -1,11 | 0,008109197 | 0,046216263 |
| 777 | Dchs2         | ENSMUSG00000102692 | 22,73   | -1,11 | 5,22E-05    | 0,000792825 |
| 778 | Fbxl16        | ENSMUSG00000025738 | 11,36   | -1,11 | 0,001170512 | 0,010110085 |
| 779 | Slc5a2        | ENSMUSG00000030781 | 62,73   | -1,10 | 6,25E-05    | 0,000924549 |
| 780 | Mxd1          | ENSMUSG00000001156 | 2529,13 | -1,10 | 5,01E-06    | 0,000110419 |
| 781 | Gc            | ENSMUSG00000035540 | 45,35   | -1,10 | 0,002486333 | 0,018396491 |
| 782 | Cish          | ENSMUSG00000032578 | 88,28   | -1,10 | 5,40E-05    | 0,000812149 |
| 783 | Scnn1a        | ENSMUSG00000030340 | 580,14  | -1,10 | 1,08E-05    | 0,000214077 |
| 784 | Sorbs3        | ENSMUSG00000022091 | 131,86  | -1,10 | 5,62E-09    | 2,99E-07    |
| 785 | MacroD1       | ENSMUSG00000036278 | 37,62   | -1,10 | 9,26E-06    | 0,000188408 |
| 786 | Higd1a        | ENSMUSG00000038412 | 245,87  | -1,10 | 3,52E-06    | 8,12E-05    |
| 787 | Gm14406       | ENSMUSG00000078865 | 7,30    | -1,10 | 0,004174674 | 0,027795329 |
| 788 | Gm5570        | ENSMUSG00000073045 | 3532,85 | -1,10 | 0,000146836 | 0,001856994 |
| 789 | Fbxo44        | ENSMUSG00000029001 | 47,00   | -1,10 | 0,000236516 | 0,002732733 |
| 790 | Spry3         | ENSMUSG00000061654 | 14,15   | -1,10 | 0,001393777 | 0,011537957 |
| 791 | Cep350        | ENSMUSG00000033671 | 1623,79 | -1,10 | 3,69E-09    | 2,05E-07    |
| 792 | Fos           | ENSMUSG00000021250 | 909,42  | -1,10 | 0,002180808 | 0,016573407 |
| 793 | Smim10l2a     | ENSMUSG00000054850 | 8,26    | -1,10 | 0,003966791 | 0,026716994 |
| 794 | Gm12480       | ENSMUSG00000087077 | 13,93   | -1,09 | 0,001571108 | 0,012689925 |
| 795 | Gm8566        | ENSMUSG00000047905 | 259,97  | -1,09 | 5,63E-05    | 0,000844131 |
| 796 | Phgdh         | ENSMUSG00000053398 | 13,90   | -1,09 | 0,002496543 | 0,018454433 |
| 797 | Igsf5         | ENSMUSG00000000159 | 892,53  | -1,09 | 2,63E-06    | 6,37E-05    |
| 798 | Gm11225       | ENSMUSG00000082368 | 19,33   | -1,09 | 0,003660491 | 0,025104519 |
| 799 | Ces2d-ps      | ENSMUSG00000031884 | 8,89    | -1,09 | 0,005186341 | 0,032814706 |
| 800 | Emb           | ENSMUSG00000021728 | 73,81   | -1,09 | 0,000275022 | 0,003096155 |
| 801 | Soat2         | ENSMUSG00000023045 | 79,87   | -1,09 | 2,37E-05    | 0,000410765 |
| 802 | Slc9a1        | ENSMUSG00000028854 | 656,86  | -1,09 | 0,000800692 | 0,007473767 |
| 803 | RP23-21O1.1   | ENSMUSG00000105423 | 11,10   | -1,09 | 0,000612828 | 0,006019629 |
| 804 | Scp2-ps2      | ENSMUSG00000058492 | 505,26  | -1,09 | 5,80E-06    | 0,000125826 |
| 805 | 5033403F01Rik | ENSMUSG00000096932 | 15,03   | -1,09 | 0,001518921 | 0,012370339 |
| 806 | Dcaf17        | ENSMUSG00000041966 | 676,92  | -1,09 | 0,000203165 | 0,002419472 |
| 807 | Pde1c         | ENSMUSG00000004347 | 374,33  | -1,09 | 2,97E-05    | 0,000493755 |
| 808 | Hsd17b11      | ENSMUSG00000029311 | 1773,13 | -1,09 | 1,24E-06    | 3,33E-05    |
| 809 | BC022687      | ENSMUSG00000037594 | 39,67   | -1,08 | 0,00082915  | 0,00767475  |

|     |               |                    |         |       |             |             |
|-----|---------------|--------------------|---------|-------|-------------|-------------|
| 810 | Atp5k-ps2     | ENSMUSG00000081700 | 302,05  | -1,08 | 0,000618975 | 0,006062101 |
| 811 | Nmnat2        | ENSMUSG00000042751 | 20,96   | -1,08 | 0,001502935 | 0,012275638 |
| 812 | RP23-338P12.3 | ENSMUSG00000106664 | 27,93   | -1,08 | 0,003901347 | 0,026329569 |
| 813 | Enpp4         | ENSMUSG00000023961 | 306,67  | -1,08 | 0,001015669 | 0,009031184 |
| 814 | Uqcrb         | ENSMUSG00000021520 | 2242,32 | -1,08 | 1,26E-05    | 0,000244666 |
| 815 | Rbm24         | ENSMUSG00000038132 | 8,29    | -1,08 | 0,006092721 | 0,037023433 |
| 816 | Trim16        | ENSMUSG00000047821 | 581,78  | -1,08 | 9,57E-14    | 1,51E-11    |
| 817 | Gm16089       | ENSMUSG00000081228 | 71,13   | -1,08 | 5,04E-08    | 2,02E-06    |
| 818 | Agpat4        | ENSMUSG00000023827 | 703,63  | -1,08 | 3,34E-05    | 0,000542473 |
| 819 | Slc3a2        | ENSMUSG00000010095 | 419,35  | -1,08 | 4,35E-07    | 1,35E-05    |
| 820 | lapp          | ENSMUSG00000041681 | 38,28   | -1,08 | 0,000126069 | 0,001636149 |
| 821 | Bckdha        | ENSMUSG00000060376 | 529,22  | -1,08 | 4,13E-05    | 0,00064929  |
| 822 | Ccnyl1        | ENSMUSG00000070871 | 163,42  | -1,08 | 5,68E-06    | 0,000123662 |
| 823 | Cox7b         | ENSMUSG00000031231 | 2539,89 | -1,08 | 3,62E-06    | 8,32E-05    |
| 824 | Pla2g10       | ENSMUSG00000022683 | 1710,50 | -1,08 | 4,67E-05    | 0,000720355 |
| 825 | Adtrp         | ENSMUSG00000058022 | 186,17  | -1,08 | 2,76E-07    | 8,95E-06    |
| 826 | Elp6          | ENSMUSG00000054836 | 164,60  | -1,07 | 9,65E-08    | 3,53E-06    |
| 827 | Dcx           | ENSMUSG00000031285 | 9,62    | -1,07 | 0,007920881 | 0,045397633 |
| 828 | Ndufb9        | ENSMUSG00000022354 | 1930,24 | -1,07 | 1,46E-08    | 7,02E-07    |
| 829 | lyd           | ENSMUSG00000019762 | 1572,81 | -1,07 | 0,000652985 | 0,006328597 |
| 830 | Gm25291       | ENSMUSG00000084744 | 605,68  | -1,07 | 2,17E-05    | 0,000383924 |
| 831 | Etnk2         | ENSMUSG00000070644 | 1805,61 | -1,07 | 0,000801471 | 0,007475043 |
| 832 | Gm13186       | ENSMUSG00000081278 | 9,25    | -1,07 | 0,002659214 | 0,019312437 |
| 833 | Gyk           | ENSMUSG00000025059 | 740,18  | -1,07 | 3,62E-05    | 0,000579362 |
| 834 | Irs2          | ENSMUSG00000038894 | 86,11   | -1,07 | 3,29E-05    | 0,000534427 |
| 835 | Il11ra1       | ENSMUSG00000073889 | 166,90  | -1,07 | 2,45E-05    | 0,000420447 |
| 836 | Ept1          | ENSMUSG00000075703 | 2095,73 | -1,07 | 1,70E-08    | 7,91E-07    |
| 837 | Cybrd1        | ENSMUSG00000027015 | 9118,43 | -1,06 | 0,002443554 | 0,018176611 |
| 838 | Cxxc4         | ENSMUSG00000044365 | 120,19  | -1,06 | 1,36E-05    | 0,000260673 |
| 839 | Klf4          | ENSMUSG00000003032 | 2302,68 | -1,06 | 0,001184725 | 0,01019924  |
| 840 | Ofcc1         | ENSMUSG00000047094 | 115,47  | -1,06 | 1,37E-05    | 0,000262435 |
| 841 | Apoo-ps       | ENSMUSG00000049233 | 56,52   | -1,06 | 0,000115211 | 0,001524697 |
| 842 | Glul          | ENSMUSG00000026473 | 5837,58 | -1,06 | 3,44E-08    | 1,46E-06    |
| 843 | Hacd3         | ENSMUSG00000033629 | 1536,46 | -1,06 | 1,47E-07    | 5,15E-06    |
| 844 | Pclo          | ENSMUSG00000061601 | 49,11   | -1,06 | 0,000634983 | 0,006172123 |
| 845 | Tmem107       | ENSMUSG00000020895 | 316,73  | -1,06 | 1,04E-06    | 2,86E-05    |
| 846 | Ston2         | ENSMUSG00000020961 | 493,36  | -1,05 | 1,80E-08    | 8,29E-07    |
| 847 | Gm2830        | ENSMUSG00000086567 | 34,07   | -1,05 | 0,001734974 | 0,013755655 |
| 848 | Zmynd12       | ENSMUSG00000070806 | 136,23  | -1,05 | 1,53E-06    | 4,00E-05    |
| 849 | 0610005C13Rik | ENSMUSG00000085214 | 46,72   | -1,05 | 7,59E-05    | 0,001089012 |
| 850 | Fads3         | ENSMUSG00000024664 | 586,73  | -1,05 | 1,20E-09    | 7,56E-08    |
| 851 | Ndufb10       | ENSMUSG00000040048 | 811,45  | -1,05 | 6,99E-09    | 3,61E-07    |
| 852 | Cidec         | ENSMUSG00000030278 | 268,49  | -1,05 | 2,14E-06    | 5,34E-05    |
| 853 | Mturn         | ENSMUSG00000038065 | 120,33  | -1,05 | 0,001041826 | 0,009210978 |
| 854 | Col4a6        | ENSMUSG00000031273 | 144,19  | -1,05 | 3,42E-05    | 0,00055208  |

|     |               |                    |         |       |             |             |
|-----|---------------|--------------------|---------|-------|-------------|-------------|
| 855 | Gata6         | ENSMUSG00000005836 | 351,38  | -1,05 | 0,000111299 | 0,001484201 |
| 856 | 4930452B06Rik | ENSMUSG00000021747 | 29,51   | -1,05 | 0,000658019 | 0,006364131 |
| 857 | Rom1          | ENSMUSG00000071648 | 49,86   | -1,05 | 1,15E-06    | 3,09E-05    |
| 858 | Gm13420       | ENSMUSG00000079497 | 9,78    | -1,05 | 0,00701048  | 0,041310171 |
| 859 | Ctnnbip1      | ENSMUSG00000028988 | 223,64  | -1,05 | 2,34E-06    | 5,76E-05    |
| 860 | Gm20631       | ENSMUSG00000093650 | 10,57   | -1,05 | 0,004429554 | 0,029040826 |
| 861 | Prop1         | ENSMUSG00000044542 | 15,28   | -1,05 | 0,001000831 | 0,008931664 |
| 862 | Abcg5         | ENSMUSG00000040505 | 44,93   | -1,05 | 0,007817379 | 0,044927246 |
| 863 | Ndufa6        | ENSMUSG00000022450 | 943,68  | -1,05 | 5,87E-08    | 2,29E-06    |
| 864 | Zfp280d       | ENSMUSG00000038535 | 1672,85 | -1,05 | 3,69E-07    | 1,17E-05    |
| 865 | Psmb6-ps2     | ENSMUSG00000100222 | 12,66   | -1,05 | 0,003027755 | 0,021493548 |
| 866 | Gm20442       | ENSMUSG00000092600 | 8,94    | -1,04 | 0,005515659 | 0,034263048 |
| 867 | Gm13150       | ENSMUSG00000086147 | 15,27   | -1,04 | 0,000642068 | 0,006230578 |
| 868 | Mgst2         | ENSMUSG00000074604 | 2818,09 | -1,04 | 4,92E-06    | 0,000108892 |
| 869 | Cgref1        | ENSMUSG00000029161 | 609,19  | -1,04 | 0,000251292 | 0,002870676 |
| 870 | Ctf1          | ENSMUSG00000042340 | 42,93   | -1,04 | 8,00E-06    | 0,000166443 |
| 871 | Arhgef9       | ENSMUSG00000025656 | 66,14   | -1,04 | 2,39E-05    | 0,000411904 |
| 872 | Tmem50b       | ENSMUSG00000022964 | 297,25  | -1,04 | 0,001553399 | 0,012581829 |
| 873 | Abhd5         | ENSMUSG00000032540 | 416,01  | -1,04 | 5,36E-11    | 4,74E-09    |
| 874 | Gstt1         | ENSMUSG00000001663 | 353,84  | -1,04 | 5,81E-08    | 2,28E-06    |
| 875 | Fam3b         | ENSMUSG00000022938 | 1926,36 | -1,04 | 1,34E-05    | 0,000257911 |
| 876 | Col8a2        | ENSMUSG00000056174 | 29,65   | -1,04 | 0,000332186 | 0,00360876  |
| 877 | Entpd5        | ENSMUSG00000021236 | 1097,30 | -1,04 | 1,93E-07    | 6,55E-06    |
| 878 | Tmed4         | ENSMUSG00000004394 | 803,72  | -1,04 | 1,22E-07    | 4,38E-06    |
| 879 | Gm4604        | ENSMUSG00000091845 | 63,65   | -1,03 | 0,003378682 | 0,023483255 |
| 880 | 2310046K23Rik | ENSMUSG00000102308 | 495,06  | -1,03 | 4,45E-06    | 9,97E-05    |
| 881 | Clybl         | ENSMUSG00000025545 | 163,23  | -1,03 | 1,25E-05    | 0,000243408 |
| 882 | Inpp5a        | ENSMUSG00000025477 | 226,94  | -1,03 | 1,44E-05    | 0,000273844 |
| 883 | Fbxl13        | ENSMUSG00000048520 | 29,86   | -1,03 | 0,000178631 | 0,002175033 |
| 884 | Cnn3          | ENSMUSG00000053931 | 464,84  | -1,03 | 0,00240525  | 0,017949588 |
| 885 | Tbc1d9        | ENSMUSG00000031709 | 313,77  | -1,03 | 0,000276591 | 0,003112321 |
| 886 | Megf9         | ENSMUSG00000039270 | 149,74  | -1,03 | 0,000905113 | 0,008227335 |
| 887 | Fbxo32        | ENSMUSG00000022358 | 643,33  | -1,03 | 2,57E-05    | 0,000437723 |
| 888 | Car5b         | ENSMUSG00000031373 | 357,06  | -1,03 | 0,00016277  | 0,002011505 |
| 889 | Gng4          | ENSMUSG00000021303 | 27,94   | -1,03 | 0,008282121 | 0,046811988 |
| 890 | Plekhb1       | ENSMUSG00000030701 | 59,02   | -1,03 | 0,000152777 | 0,001911355 |
| 891 | Insig1        | ENSMUSG00000045294 | 1373,00 | -1,03 | 4,85E-05    | 0,000744507 |
| 892 | Coro2b        | ENSMUSG00000041729 | 96,02   | -1,02 | 0,000243044 | 0,002788778 |
| 893 | Acat1         | ENSMUSG00000032047 | 1151,45 | -1,02 | 0,00013184  | 0,001705352 |
| 894 | Klhl22        | ENSMUSG00000022750 | 389,76  | -1,02 | 7,49E-23    | 5,28E-20    |
| 895 | Fam96b        | ENSMUSG00000031879 | 235,44  | -1,02 | 3,05E-06    | 7,26E-05    |
| 896 | Scgb1b18      | ENSMUSG00000101401 | 32,59   | -1,02 | 0,000327019 | 0,003559271 |
| 897 | Btnl4         | ENSMUSG00000058435 | 125,87  | -1,02 | 0,002482863 | 0,018382506 |
| 898 | Hspb11        | ENSMUSG00000063172 | 114,01  | -1,02 | 0,000361258 | 0,003882898 |
| 899 | Cox6a1        | ENSMUSG00000041697 | 2956,80 | -1,02 | 1,30E-06    | 3,47E-05    |



|     |          |                    |         |       |             |             |
|-----|----------|--------------------|---------|-------|-------------|-------------|
| 900 | Dpy19l2  | ENSMUSG00000085576 | 41,50   | -1,02 | 0,000974546 | 0,008735624 |
| 901 | Abhd2    | ENSMUSG00000039202 | 6672,21 | -1,02 | 6,54E-06    | 0,000139788 |
| 902 | Spata32  | ENSMUSG00000044787 | 48,63   | -1,02 | 0,002393559 | 0,017886359 |
| 903 | Abcb6    | ENSMUSG00000026198 | 26,76   | -1,02 | 0,000788398 | 0,007373805 |
| 904 | Rasgef1b | ENSMUSG00000029333 | 1006,50 | -1,02 | 2,48E-05    | 0,000424318 |
| 905 | Rny3     | ENSMUSG00000064945 | 2971,58 | -1,02 | 0,000812562 | 0,00755728  |
| 906 | Got1     | ENSMUSG00000025190 | 675,15  | -1,02 | 2,49E-06    | 6,08E-05    |
| 907 | Adipor2  | ENSMUSG00000030168 | 2967,57 | -1,02 | 2,28E-13    | 3,33E-11    |
| 908 | Gm26461  | ENSMUSG00000092805 | 12,35   | -1,01 | 0,004446626 | 0,029106326 |
| 909 | Casp14   | ENSMUSG00000005355 | 49,59   | -1,01 | 0,000264049 | 0,002988528 |
| 910 | Aldh1l1  | ENSMUSG00000030088 | 333,61  | -1,01 | 1,66E-05    | 0,000307178 |
| 911 | Hcar1    | ENSMUSG00000049241 | 21,83   | -1,01 | 0,000804572 | 0,007497955 |
| 912 | Bpnt1    | ENSMUSG00000026617 | 1726,24 | -1,01 | 2,46E-08    | 1,09E-06    |
| 913 | Enpp5    | ENSMUSG00000023960 | 615,10  | -1,01 | 0,00135734  | 0,01130469  |
| 914 | Idh2     | ENSMUSG00000030541 | 594,62  | -1,01 | 0,000765628 | 0,007186835 |
| 915 | Hpgd     | ENSMUSG00000031613 | 2480,88 | -1,01 | 4,70E-08    | 1,90E-06    |
| 916 | Btnl9    | ENSMUSG00000040283 | 40,40   | -1,01 | 0,001162187 | 0,010061047 |
| 917 | Car9     | ENSMUSG00000028463 | 621,98  | -1,01 | 0,001527936 | 0,012410149 |
| 918 | Cd300c   | ENSMUSG00000058728 | 253,42  | -1,01 | 0,001610365 | 0,012954012 |
| 919 | Abhd17a  | ENSMUSG00000003346 | 324,44  | -1,01 | 4,52E-11    | 4,07E-09    |
| 920 | Aldh1a1  | ENSMUSG00000053279 | 1803,07 | -1,00 | 9,75E-06    | 0,000196017 |
| 921 | Uqcr11   | ENSMUSG00000020163 | 2396,83 | -1,00 | 8,30E-07    | 2,37E-05    |
| 922 | Gm23455  | ENSMUSG00000065265 | 559,99  | -1,00 | 0,006463228 | 0,038772704 |
| 923 | Lrrn3    | ENSMUSG00000036295 | 43,72   | -1,00 | 0,003741579 | 0,025502798 |
| 924 | Arl10    | ENSMUSG00000025870 | 757,40  | -1,00 | 1,09E-06    | 2,98E-05    |
| 925 | Snx6     | ENSMUSG00000005656 | 1015,80 | -1,00 | 0,000157089 | 0,001950675 |
| 926 | Fam134b  | ENSMUSG00000022270 | 370,28  | -1,00 | 0,008119133 | 0,046241994 |

| ENSEMBL_ID         | SYMBOL   | log2FC_RNASEQ | Lai_mo_padj<0.05 UP | Udd_padj<0.05 UP | Lai_PJS_padj<0.05 UP | count |
|--------------------|----------|---------------|---------------------|------------------|----------------------|-------|
| ENSMUSG00000026249 | Serpine2 | 2,685639962   | yes                 | yes              | no                   | 2     |
| ENSMUSG00000031089 | Slc6a14  | 2,598336259   | yes                 | no               | yes                  | 2     |
| ENSMUSG00000015134 | Aldh1a3  | 2,503823324   | yes                 | yes              | no                   | 2     |
| ENSMUSG00000004371 | Il11     | 2,459406182   | yes                 | yes              | no                   | 2     |
| ENSMUSG00000074272 | Ceacam1  | 2,281343615   | yes                 | yes              | no                   | 2     |
| ENSMUSG00000047517 | Dmbt1    | 2,145363499   | yes                 | yes              | no                   | 2     |
| ENSMUSG00000021994 | Wnt5a    | 2,098895204   | yes                 | no               | yes                  | 2     |
| ENSMUSG00000026069 | Il1rl1   | 2,022292391   | yes                 | yes              | no                   | 2     |
| ENSMUSG00000001435 | Col18a1  | 1,959744266   | yes                 | yes              | no                   | 2     |
| ENSMUSG00000021508 | Cxcl14   | 1,912444781   | yes                 | yes              | no                   | 2     |
| ENSMUSG00000046402 | Rbp1     | 1,910416627   | yes                 | yes              | no                   | 2     |
| ENSMUSG00000029377 | Ereg     | 1,903854808   | yes                 | yes              | no                   | 2     |
| ENSMUSG00000001131 | Timp1    | 1,759261539   | yes                 | no               | yes                  | 2     |
| ENSMUSG00000073418 | C4b      | 1,657631377   | yes                 | yes              | no                   | 2     |
| ENSMUSG00000027978 | Prss12   | 1,510662375   | yes                 | yes              | no                   | 2     |
| ENSMUSG00000022146 | Osmr     | 1,450192931   | no                  | yes              | yes                  | 2     |
| ENSMUSG00000042808 | Gpx2     | 1,431485324   | yes                 | yes              | no                   | 2     |
| ENSMUSG00000067377 | Tspan6   | 1,394343636   | yes                 | yes              | no                   | 2     |
| ENSMUSG00000048992 | Prss32   | 1,322534933   | yes                 | yes              | no                   | 2     |
| ENSMUSG00000032369 | Plscr1   | 1,184575686   | yes                 | yes              | no                   | 2     |
| ENSMUSG00000034634 | Ly6d     | 1,16470004    | yes                 | yes              | no                   | 2     |
| ENSMUSG00000027907 | S100a11  | 0,91324816    | no                  | yes              | yes                  | 2     |
| ENSMUSG00000051022 | Hs3st1   | 0,865142745   | no                  | yes              | yes                  | 2     |
| ENSMUSG00000067006 | Serpib5  | 0,820453194   | yes                 | no               | yes                  | 2     |
| ENSMUSG00000039942 | Ptger4   | 0,812180942   | yes                 | yes              | no                   | 2     |
| ENSMUSG00000020592 | Sdc1     | 0,643618444   | no                  | yes              | yes                  | 2     |
| ENSMUSG00000037440 | Vnn1     | 3,338267001   | no                  | yes              | no                   | 1     |
| ENSMUSG00000022037 | Clu      | 2,941451793   | no                  | yes              | no                   | 1     |
| ENSMUSG00000019775 | Rgs17    | 2,66800112    | yes                 | no               | no                   | 1     |
| ENSMUSG00000030366 | Ceacam12 | 2,563332653   | yes                 | no               | no                   | 1     |
| ENSMUSG00000051076 | Vtcn1    | 2,485703816   | yes                 | no               | no                   | 1     |
| ENSMUSG00000059654 | Reg1     | 2,41603811    | no                  | yes              | no                   | 1     |
| ENSMUSG00000021950 | Anxa8    | 2,314806917   | no                  | yes              | no                   | 1     |
| ENSMUSG00000021795 | Sftpd    | 2,302657068   | yes                 | no               | no                   | 1     |
| ENSMUSG00000026822 | Lcn2     | 2,147179104   | no                  | no               | yes                  | 1     |
| ENSMUSG00000072941 | Sod3     | 2,137861805   | yes                 | no               | no                   | 1     |
| ENSMUSG00000041301 | Cftr     | 2,067663467   | no                  | yes              | no                   | 1     |
| ENSMUSG00000045136 | Tubb2b   | 2,047550643   | yes                 | no               | no                   | 1     |
| ENSMUSG00000026185 | Igfbp5   | 1,979311038   | no                  | no               | yes                  | 1     |
| ENSMUSG00000005087 | Cd44     | 1,931984454   | yes                 | no               | no                   | 1     |
| ENSMUSG00000026417 | Pigr     | 1,887042797   | no                  | yes              | no                   | 1     |
| ENSMUSG00000047230 | Cldn2    | 1,838112859   | yes                 | no               | no                   | 1     |
| ENSMUSG00000026981 | Il1rn    | 1,828954959   | yes                 | no               | no                   | 1     |
| ENSMUSG00000040990 | Sh3kbp1  | 1,822492338   | yes                 | no               | no                   | 1     |
| ENSMUSG00000031963 | Bmper    | 1,820551378   | yes                 | no               | no                   | 1     |
| ENSMUSG00000017390 | Aldoc    | 1,809587      | yes                 | no               | no                   | 1     |
| ENSMUSG00000070942 | Il1rl2   | 1,801800245   | yes                 | no               | no                   | 1     |
| ENSMUSG00000051439 | Cd14     | 1,792430781   | yes                 | no               | no                   | 1     |
| ENSMUSG00000042734 | Ttc9     | 1,708159587   | yes                 | no               | no                   | 1     |
| ENSMUSG00000024665 | Fads2    | 1,693810778   | yes                 | no               | no                   | 1     |
| ENSMUSG00000031502 | Col4a1   | 1,687863713   | no                  | no               | yes                  | 1     |
| ENSMUSG00000045382 | Cxcr4    | 1,665770926   | yes                 | no               | no                   | 1     |
| ENSMUSG00000015787 | Abo      | 1,665097642   | yes                 | no               | no                   | 1     |
| ENSMUSG00000028238 | Atp6v0d2 | 1,641209129   | yes                 | no               | no                   | 1     |
| ENSMUSG00000030017 | Reg3g    | 1,621368472   | no                  | yes              | no                   | 1     |
| ENSMUSG00000017723 | Wfdc2    | 1,572199251   | no                  | yes              | no                   | 1     |
| ENSMUSG00000071356 | Reg3b    | 1,558457106   | no                  | yes              | no                   | 1     |
| ENSMUSG00000026579 | F5       | 1,553840917   | yes                 | no               | no                   | 1     |

|                    |               |             |     |     |     |   |
|--------------------|---------------|-------------|-----|-----|-----|---|
| ENSMUSG00000017607 | Tns4          | 1,540909879 | yes | no  | no  | 1 |
| ENSMUSG00000000204 | Slfn4         | 1,507048555 | yes | no  | no  | 1 |
| ENSMUSG00000032769 | Trpa1         | 1,50292501  | no  | no  | yes | 1 |
| ENSMUSG00000035165 | Kcne3         | 1,494339619 | yes | no  | no  | 1 |
| ENSMUSG00000048376 | F2r           | 1,481998919 | yes | no  | no  | 1 |
| ENSMUSG00000022122 | Ednrb         | 1,401115795 | yes | no  | no  | 1 |
| ENSMUSG00000023336 | Wfdc1         | 1,374375661 | no  | no  | yes | 1 |
| ENSMUSG00000026072 | Il1r1         | 1,317495639 | no  | yes | no  | 1 |
| ENSMUSG00000020717 | Pecam1        | 1,315403495 | no  | no  | yes | 1 |
| ENSMUSG00000031616 | Ednra         | 1,312422703 | no  | no  | yes | 1 |
| ENSMUSG00000075012 | Fjx1          | 1,309902959 | no  | no  | yes | 1 |
| ENSMUSG00000061132 | Blnk          | 1,309350091 | no  | yes | no  | 1 |
| ENSMUSG00000062991 | Nrg1          | 1,302861946 | no  | no  | yes | 1 |
| ENSMUSG00000035357 | Pdzrn3        | 1,294541298 | yes | no  | no  | 1 |
| ENSMUSG00000010663 | Fads1         | 1,291668244 | yes | no  | no  | 1 |
| ENSMUSG00000000544 | Gpa33         | 1,247704016 | yes | no  | no  | 1 |
| ENSMUSG00000031093 | Dock11        | 1,22353435  | yes | no  | no  | 1 |
| ENSMUSG00000035504 | Reep6         | 1,194621126 | no  | yes | no  | 1 |
| ENSMUSG00000050505 | Pcdh20        | 1,177874918 | yes | no  | no  | 1 |
| ENSMUSG00000035566 | Pcdh17        | 1,165836616 | no  | no  | yes | 1 |
| ENSMUSG00000058656 | Samd12        | 1,162310153 | yes | no  | no  | 1 |
| ENSMUSG00000027377 | Mall          | 1,157613521 | yes | no  | no  | 1 |
| ENSMUSG00000028634 | Hivep3        | 1,155916271 | yes | no  | no  | 1 |
| ENSMUSG00000058063 | Trim31        | 1,138346098 | no  | no  | yes | 1 |
| ENSMUSG00000032854 | Ugt8a         | 1,125294987 | yes | no  | no  | 1 |
| ENSMUSG00000024427 | Spry4         | 1,111909222 | no  | no  | yes | 1 |
| ENSMUSG00000027695 | Pld1          | 1,109581748 | no  | yes | no  | 1 |
| ENSMUSG00000004665 | Cnn2          | 1,09367173  | no  | no  | yes | 1 |
| ENSMUSG00000020774 | Aspa          | 1,083441532 | yes | no  | no  | 1 |
| ENSMUSG00000024421 | Lama3         | 1,041060226 | no  | yes | no  | 1 |
| ENSMUSG00000026175 | Vil1          | 1,034665226 | no  | yes | no  | 1 |
| ENSMUSG00000041633 | Kctd12b       | 1,031423027 | yes | no  | no  | 1 |
| ENSMUSG00000033350 | Chst2         | 1,021866657 | no  | no  | yes | 1 |
| ENSMUSG00000027995 | Tlr2          | 0,995495936 | yes | no  | no  | 1 |
| ENSMUSG00000035020 | Epgn          | 0,961592121 | yes | no  | no  | 1 |
| ENSMUSG00000030935 | Acsn3         | 0,956945565 | yes | no  | no  | 1 |
| ENSMUSG00000074637 | Sox2          | 0,956538608 | yes | no  | no  | 1 |
| ENSMUSG00000000628 | Hk2           | 0,949838448 | no  | no  | yes | 1 |
| ENSMUSG00000039676 | Capsl         | 0,941169455 | yes | no  | no  | 1 |
| ENSMUSG00000037580 | Gch1          | 0,937271656 | no  | yes | no  | 1 |
| ENSMUSG00000026701 | Prdx6         | 0,895506469 | no  | yes | no  | 1 |
| ENSMUSG00000005148 | Klf5          | 0,874165806 | no  | yes | no  | 1 |
| ENSMUSG00000054871 | Tmem158       | 0,873207344 | no  | no  | yes | 1 |
| ENSMUSG00000031278 | Acsl4         | 0,871942565 | no  | yes | no  | 1 |
| ENSMUSG00000024989 | Cep55         | 0,859252199 | no  | no  | yes | 1 |
| ENSMUSG00000019326 | Aoc3          | 0,852051865 | no  | yes | no  | 1 |
| ENSMUSG00000032231 | Anxa2         | 0,842683622 | no  | yes | no  | 1 |
| ENSMUSG00000029102 | Hgfac         | 0,839874966 | yes | no  | no  | 1 |
| ENSMUSG00000024659 | Anxa1         | 0,830794914 | no  | yes | no  | 1 |
| ENSMUSG00000078238 | Gm12854       | 0,828689288 | no  | yes | no  | 1 |
| ENSMUSG00000039706 | Ldb2          | 0,828269412 | no  | no  | yes | 1 |
| ENSMUSG00000031938 | 4931406C07Rik | 0,81262883  | no  | yes | no  | 1 |
| ENSMUSG00000022676 | Snai2         | 0,802302871 | no  | no  | yes | 1 |
| ENSMUSG00000008999 | Bmp7          | 0,787350098 | no  | no  | yes | 1 |
| ENSMUSG00000006519 | Cyba          | 0,777331923 | no  | yes | no  | 1 |
| ENSMUSG00000031673 | Cdh11         | 0,757924992 | no  | no  | yes | 1 |
| ENSMUSG00000028698 | Pik3r3        | 0,75705549  | no  | no  | yes | 1 |
| ENSMUSG00000021701 | Plk2          | 0,744468572 | no  | no  | yes | 1 |
| ENSMUSG00000026070 | Il18r1        | 0,717278514 | yes | no  | no  | 1 |

|                    |         |             |    |     |     |   |
|--------------------|---------|-------------|----|-----|-----|---|
| ENSMUSG00000028583 | Pdpn    | 0,705349815 | no | no  | yes | 1 |
| ENSMUSG00000000420 | Galnt1  | 0,700228084 | no | yes | no  | 1 |
| ENSMUSG00000027351 | Spred1  | 0,696557337 | no | no  | yes | 1 |
| ENSMUSG00000026042 | Col5a2  | 0,68751202  | no | yes | no  | 1 |
| ENSMUSG00000030560 | Ctsc    | 0,686815425 | no | yes | no  | 1 |
| ENSMUSG00000022500 | Litaf   | 0,666943258 | no | yes | no  | 1 |
| ENSMUSG00000001946 | Esam    | 0,664162812 | no | no  | yes | 1 |
| ENSMUSG00000026074 | Map4k4  | 0,659094493 | no | no  | yes | 1 |
| ENSMUSG00000015766 | Eps8    | 0,582855093 | no | yes | no  | 1 |
| ENSMUSG00000025357 | Dgka    | 0,581664304 | no | yes | no  | 1 |
| ENSMUSG00000021266 | Wars    | 0,563366165 | no | no  | yes | 1 |
| ENSMUSG00000021959 | Lats2   | 0,558031705 | no | no  | yes | 1 |
| ENSMUSG00000031939 | Taf1d   | 0,555237687 | no | yes | no  | 1 |
| ENSMUSG00000039286 | Fndc3b  | 0,546397936 | no | no  | yes | 1 |
| ENSMUSG00000053004 | Hrh1    | 0,538945023 | no | no  | yes | 1 |
| ENSMUSG00000016946 | Kctd5   | 0,489029516 | no | no  | yes | 1 |
| ENSMUSG00000043067 | Dpy19l1 | 0,437116341 | no | no  | yes | 1 |
| ENSMUSG00000037824 | Tspan14 | 0,426778565 | no | no  | yes | 1 |
| ENSMUSG00000029994 | Anxa4   | 0,391392401 | no | yes | no  | 1 |

| <b>Gene</b> | <b>Forward primer 3' - 5'</b> | <b>Reverse primer 3' - 5'</b> |
|-------------|-------------------------------|-------------------------------|
| B-actin     | CTAAGGCCAACCGTGAAAAG          | ACCAGAGGCATACAGGGACA          |
| Cxcl14      | AGGCTCCTGGCGGCCGCGCTG         | CACCCTATTCTTCGTAGACC          |
| Ereg        | ACCGTGATCCCCATCATGC           | GGGGATCGTCTTCCATCTG           |
| Grem2       | GAGGAGAGGGACAGGGAGAC          | AGCGAGAGCTTCCAGAACAT          |
| IL11        | CTGTGGGGACATGAACTGTG          | ATCTGCTCGAGGGTCTGAAG          |
| IL6         | ACAAAGCCAGAGTCCTTCAGA         | TGGTCCTTAGCCACTCCTTC          |
| Lgr5        | TAAAGACGACGGCAACAGTG          | GCCTTCAGGTCTTCCTCAA           |
| Lif         | ATTGGCGCGAGATGAGAT            | GGCACAGGTGGCATTTACA           |
| Lkb1        | GGCAACCTGCTACTCACCCAC         | CAATCTCAGGAGGCTGGAAGG         |
| Lrg1        | CTTCCTGGGGTCTTGAGGA           | GGCAAGGCAGGTCTTGAG            |
| Mark1       | GAAGAACTGTTAGTGCTGA           | AGAAGGATGTAAGTAGCCAT          |
| Mark2       | CTACCCACGCTGAACGAAAGG         | GTAGTTGCCAATATGGGGCTG         |
| Mark3       | CCCTTTGCCAACGGTGAATG          | CCCTTGCCGATTGTTTTCAAC         |
| Mark4       | GGACACGCATGGCACATTG           | GCAGGAAGCGATAGAGTTCCG         |
| Nuak1       | ATGGAATATGCCAGCAAAGG          | GTTGGAGAGCCCAAAGTCAG          |
| Nuak2       | GCACCATCACAAACACAACC          | ATCTCCCTCCGTATGTGCAG          |
| Reg3b       | AACAGCCTGCTCCGTCAT            | GAGGGTATATTCTTCAGGGAGTCTT     |
| Reg3g       | GCTTCCCCGTATAACCATCA          | GCATCTTTCTTGGCAACTTCA         |
| Sdf1        | CCAAACTGTGCCCTTCAGAT          | ATTTCCGGGTCAATGCACACT         |
| Serpine2    | TTGGGTCAAAAATGAGACCAG         | CCTTGAAATACACTGCATTAACGA      |
| Sik1        | CAGATTCTGTGAGCCGTGGA          | GCTGGGGACCCTCGTACTCC          |
| Sik2        | GGCCGGAAGGTAGTGACACAG         | GAATCTTCCTTCTAAAACCC          |
| Sik3        | GAATCTTCCTTCTAAAACCC          | AATACACCGCTGTGACGATC          |
| TgfB1       | TGGAGCAACATGTGGAATC           | GTCAGCAGCCGGTTACCA            |
| Wnt5a       | ATGAAGCAGGCCGTAGGAC           | CTTCTCCTTGAGGGCATCG           |
